# Supplementary material
Source: PubMed Central journal article supplement (PMC4144355)
Supplement: NIHMS492770-supplement-1.pdf [file NIHMS492770-supplement-1.pdf]

## Supplementary Materials

### **Conferring Virulence: Structure and Function of the chimeric A<sub>2</sub>B<sub>5</sub> Typhoid Toxin**

Jeongmin Song, Xiang Gao, and Jorge E. Galán  
Department of Microbial Pathogenesis, Yale University School of Medicine, New Haven, CT  
06536

This file contains:

- \*15 Supplementary figures
- \*4 Supplementary Tables

#### Supplementary Figures:

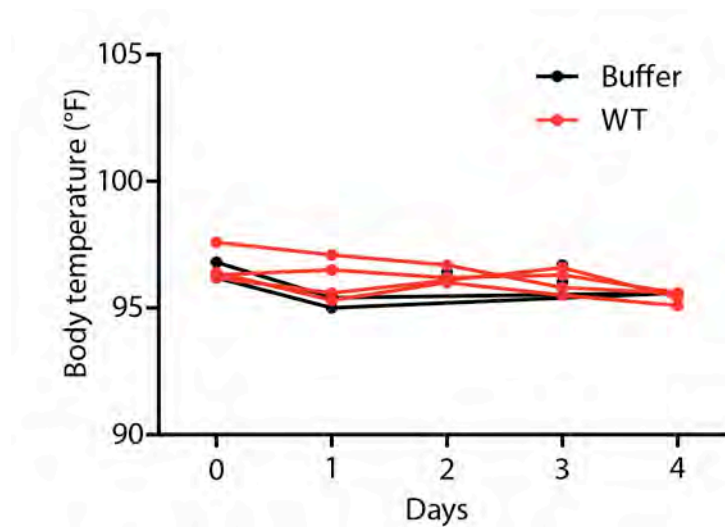

**Supplementary Figure S1.** Body temperature of typhoid toxin or buffer treated animals. Each dot represents a measurement of a single animal.

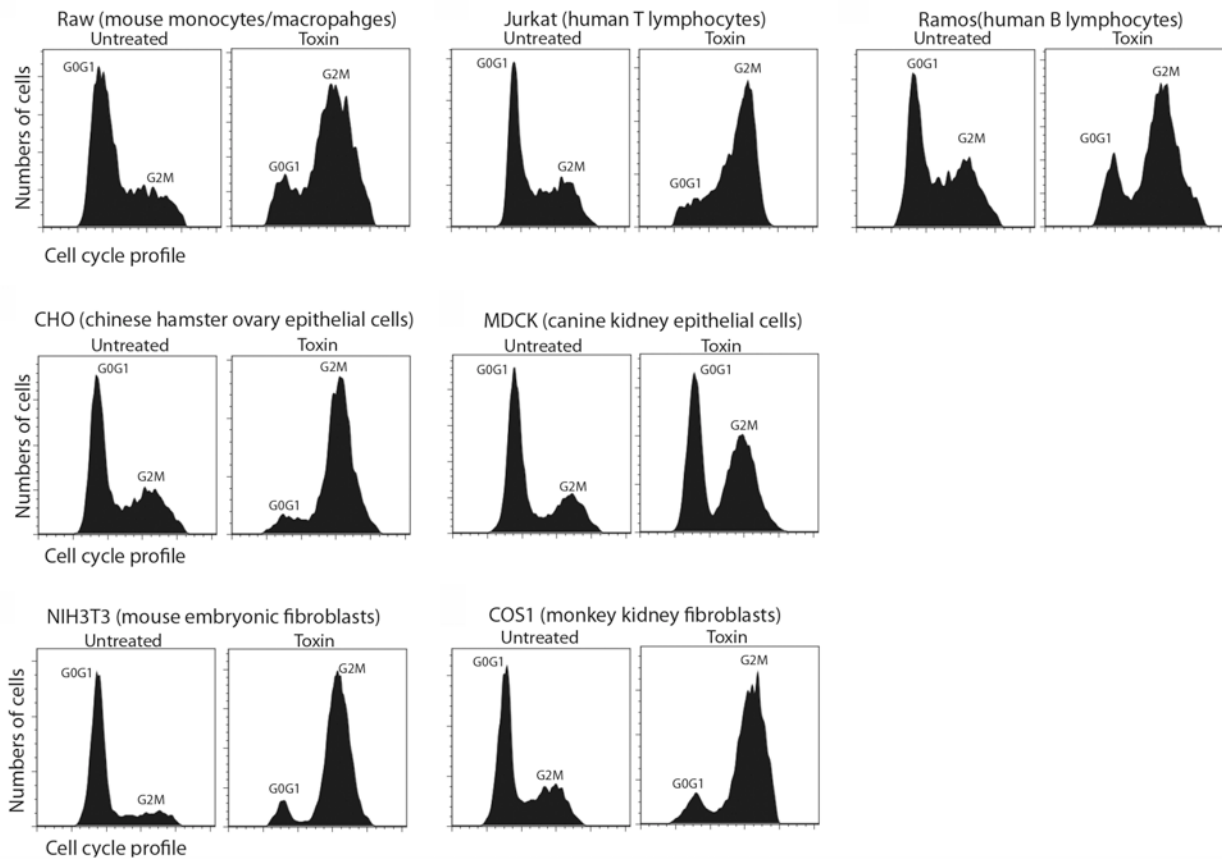

**Supplementary Figure S2.** Typhoid toxin is able to intoxicate a broad range of host cells. Various host cells were mock treated or treated with 0.02 nM of purified typhoid holotoxin for 24 (Raw, Jurkat, and Ramos cells) or for 48 (COS1, CHO, MDCK, and NIH3T3) hrs and the cell cycle profiles of the treated cells determined by flow cytometric analysis. Equivalent results were obtained in several repetitions of this experiment.

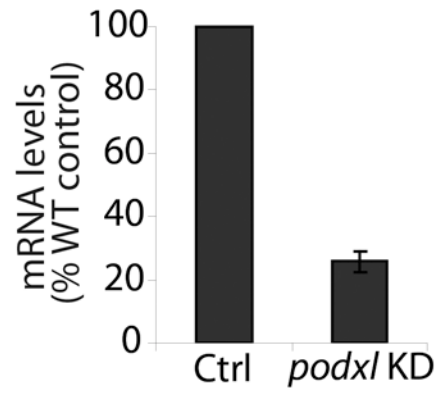

**Supplementary Figure S3.** *podxl* mRNA levels in control cells or cell expressing an siRNA targeted to *podxl* as measured by real-time PCR. Bar represents the average of the expression level  $\pm$  standard deviation of three independent determinations.

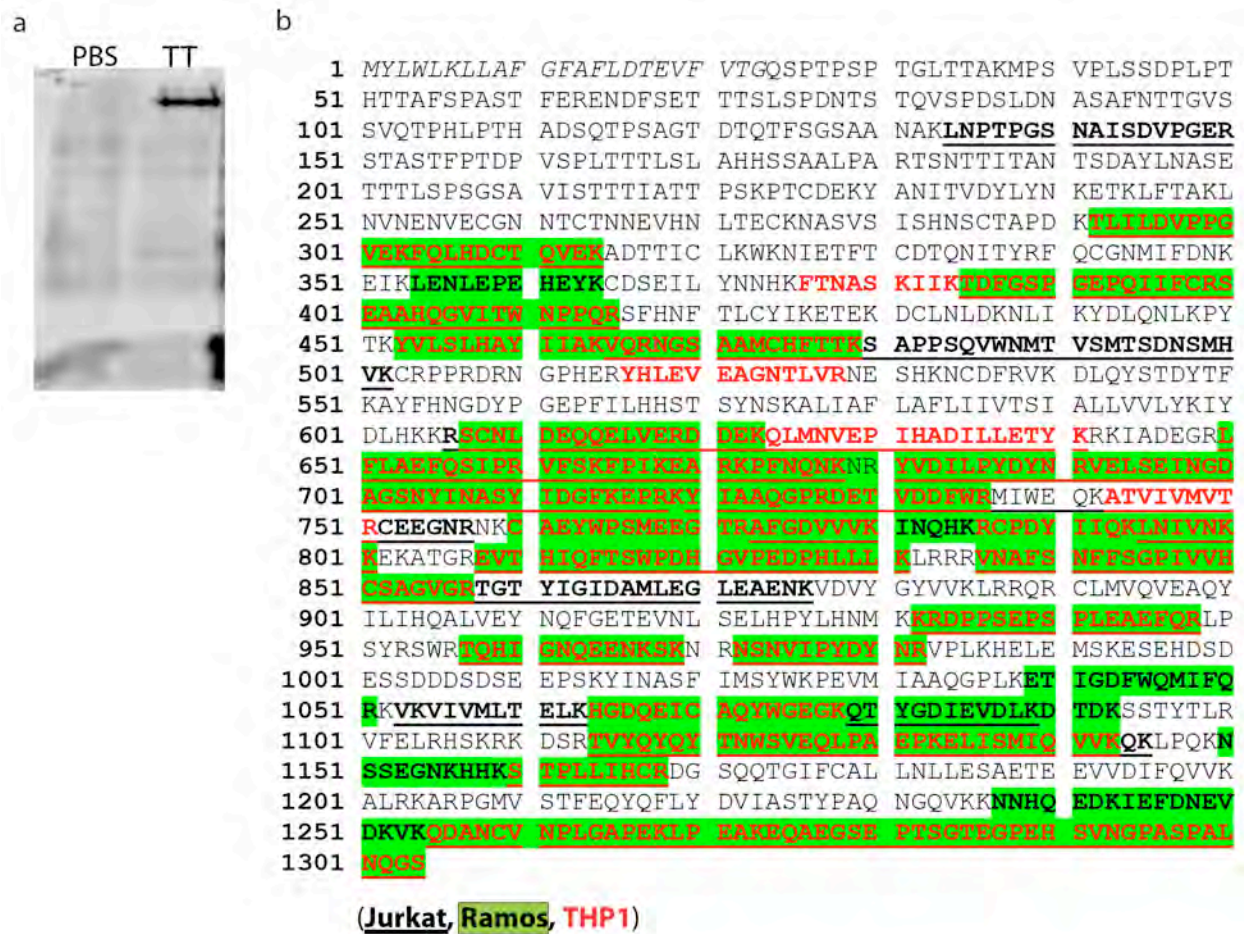

**Supplementary Figure S4.** Typhoid toxin recognizes terminally sialylated glycans on CD45 in T, B, and macrophage cell lines. Cell surface proteins from Jurkat, Ramos, and THP1 cells were biotinylated, co-immunoprecipitated with purified typhoid toxin (TT), and analyzed by SDS-PAGE [Jurkat cells are shown in (a)] and LC-MS/MS. The CD45 peptides identified by LC-MS/MS are indicated as underlined for Jurkat, green shaded boxes for Ramos, and red font for THP1 cells. The location of the signal peptide is indicated in italics.

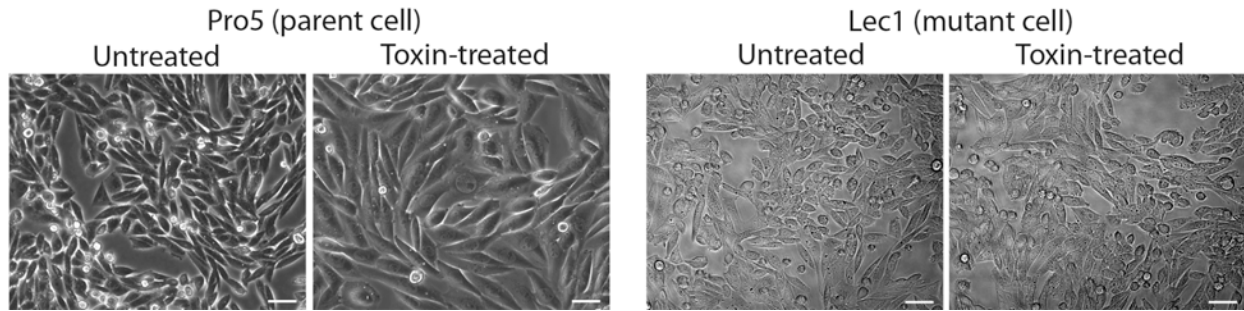

**Supplementary Figure S5.** A mutant cell line that lacks surface N-glycans is more resistant to typhoid toxin. The N-acetylglucosaminyltransferase I-deficient (Lec1) and its parent (Pro5) cell lines were treated with typhoid toxin and examined by light microscopy. Cell distention is observed in Pro5 but not in Lec1 toxin treated cells. Equivalent results were obtained in at least three repetition of this experiment. Scale bar: 50  $\mu\text{m}$ .

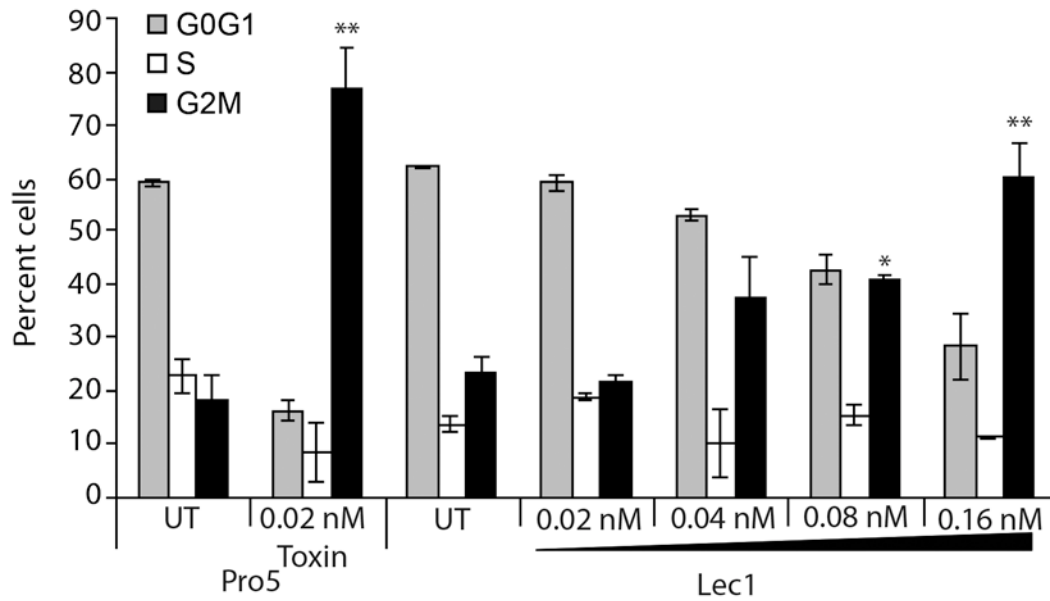

**Supplementary Figure S6.** A mutant cell line that lacks surface N-glycans can be intoxicated by typhoid toxin when administered at high concentrations. The N-acetylglucosaminyltransferase I-deficient (Lec1) and its parent (Pro5) cell lines were treated with increasing concentrations of typhoid toxin (as indicated) and toxicity was evaluated by flow cytometric cell cycle analysis 36 hs after treatment. Bar represents average  $\pm$  standard deviation of at least three independent determinations. \*,  $P < 0.05$ , \*\* $P < 0.01$  compared to the number of cells in G2M of untreated (UT) group.

a

| Subunit                               | Mw (kDa) | Stoichiometry (yielding observed 116 kDa complex) |           |           |           |
|---------------------------------------|----------|---------------------------------------------------|-----------|-----------|-----------|
|                                       |          | Complex 1                                         | Complex 2 | Complex 3 | Complex 4 |
| CdtB <sup>3F</sup>                    | 29.835   | 1                                                 | 2         | 2         | 1         |
| PltA                                  | 25.094   | 1                                                 | 2         | 1         | 2         |
| PltB                                  | 12.553   | 5                                                 | 1         | 3         | 3         |
| Predicted Mw                          |          | 117.694                                           | 122.411   | 122.423   | 117.682   |
| Predicted 0.1% extinction coefficient |          | 1.65                                              | 1.26      | 1.47      | 1.43      |

c

| Amino acid composition analysis |                  |               |
|---------------------------------|------------------|---------------|
| Subunit                         | nmole (analyzed) | Stoichiometry |
| CdtB <sup>3F</sup>              | 0.0444           | 1             |
| PltA                            | 0.0505           | 1             |
| PltB                            | 0.2402           | 5             |

b

| Complex   | Observed UV/RI ratio | Predicted UV/RI ratio | Difference (%) ((Predicted-Observed)/Predicted) | Observed Mw | Predicted Mw | Difference (%) ((Predicted-Observed)/Predicted) |
|-----------|----------------------|-----------------------|-------------------------------------------------|-------------|--------------|-------------------------------------------------|
| Complex 1 | 8388.94              | 8604.094              | 3%                                              | 116         | 117.694      | 1%                                              |
| Complex 2 | 8388.94              | 6585.783              | -21%                                            | 116         | 122.411      | 6%                                              |
| Complex 3 | 8388.94              | 7701.642              | -8%                                             | 116         | 122.423      | 6%                                              |
| Complex 4 | 8388.94              | 7443.486              | -11%                                            | 116         | 117.682      | 1%                                              |

**Supplementary Figure S7.** Typhoid toxin exhibits an A<sub>2</sub>B<sub>5</sub> composition. Of all the possible complexes compatible with the observed molecular weight of typhoid toxin (116 kDa as measured by SEC-LS analysis) (a), complex 1 is the most likely for the observed extinction coefficient (b). c, Amino acid composition analysis of typhoid toxin. The purified typhoid holotoxin complex was resolved on a 15% SDS-PAGE gel, stained with coomassie brilliant blue, and the three individual bands were excised for quantitative amino acid analysis.



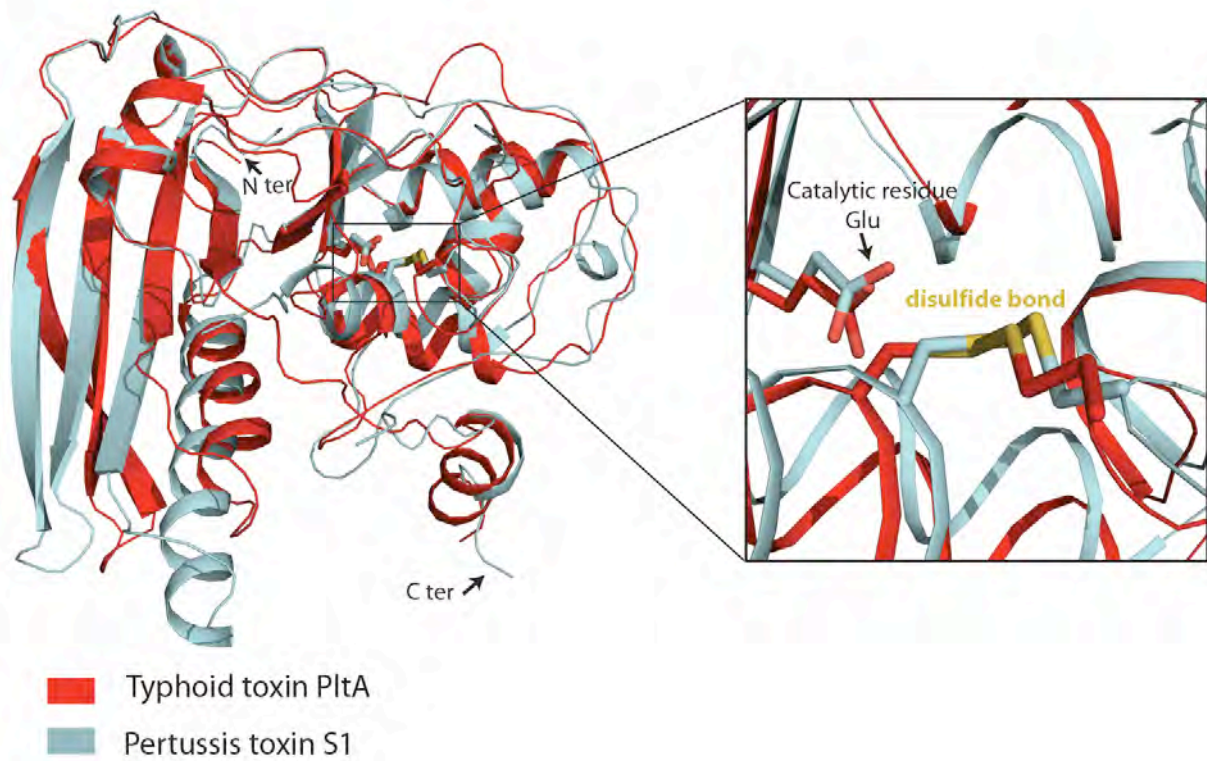

**Supplementary Figure S8.** Structure alignment between typhoid toxin PltA and pertussis toxin S1. The conserved catalytic residue glutamic acid and disulfide bond are shown in inset.



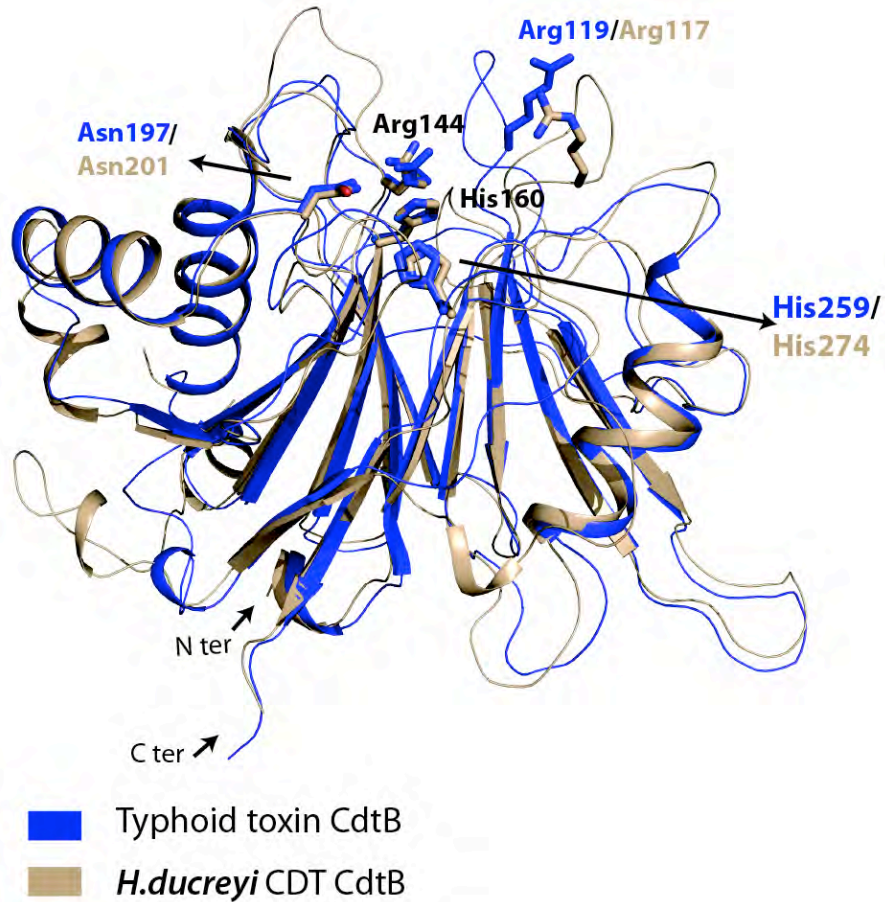

**Supplementary Figure S9.** Structure alignment between CdtB from typhoid toxin and from *H. ducreyi* CDT. The conserved catalytic (His160 and His 274) and DNA-contact (Arg117, Arg144, and Asn201) are shown.

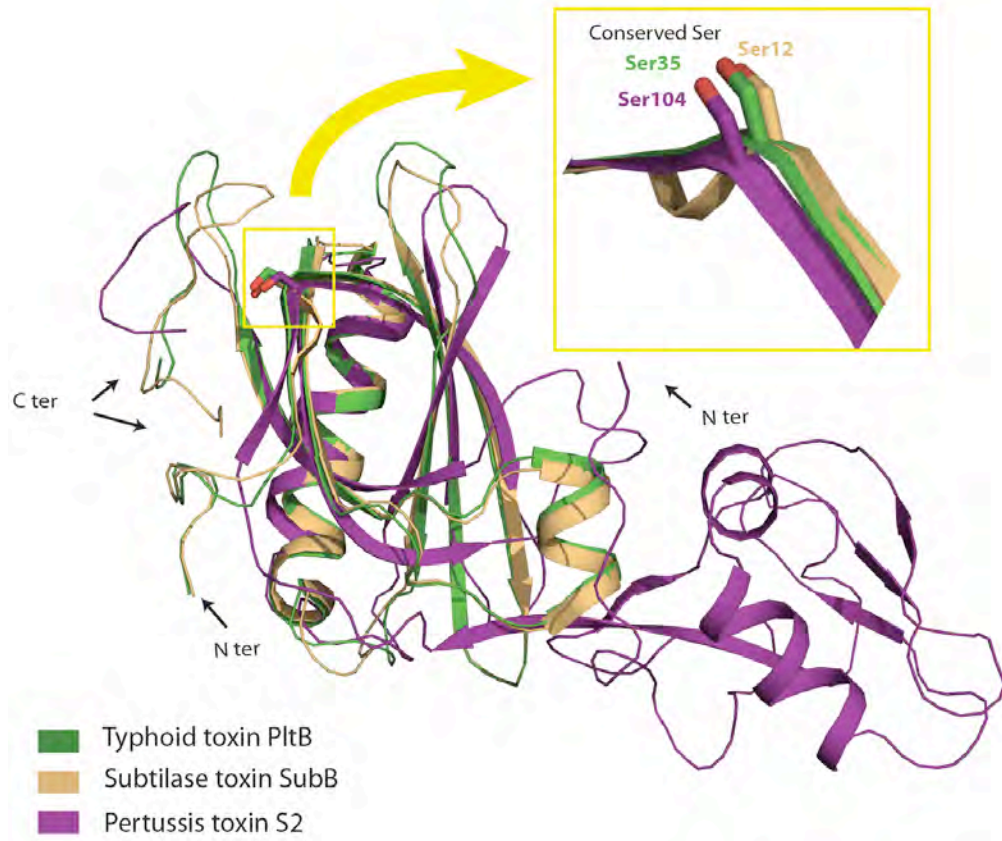

**Supplementary Figure S10.** Structure alignment of PltB homologs from the B subunits of Subtilase (SubB) and Pertussis (S2) toxins. A conserved serine essential for sugar binding is depicted in the inset.

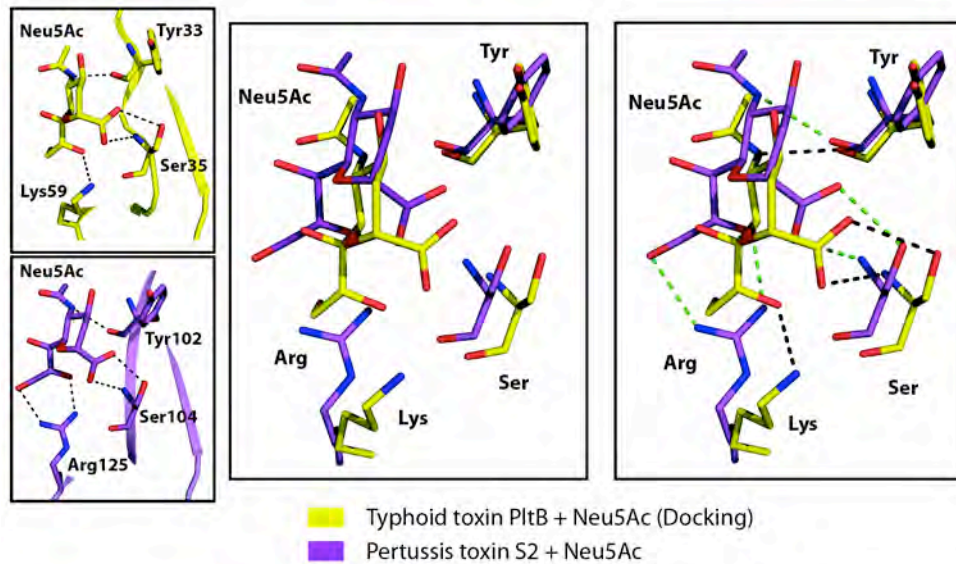

**Supplementary Figure S11.** Conserved sugar-binding residues in typhoid toxin PltB and pertussis toxin S2. The position of the sugar ligand N-acetylneuraminic acid (Neu5Ac) relative to key residues of pertussis toxin S2 (from the crystal structure) and PltB (from molecular docking) is depicted.

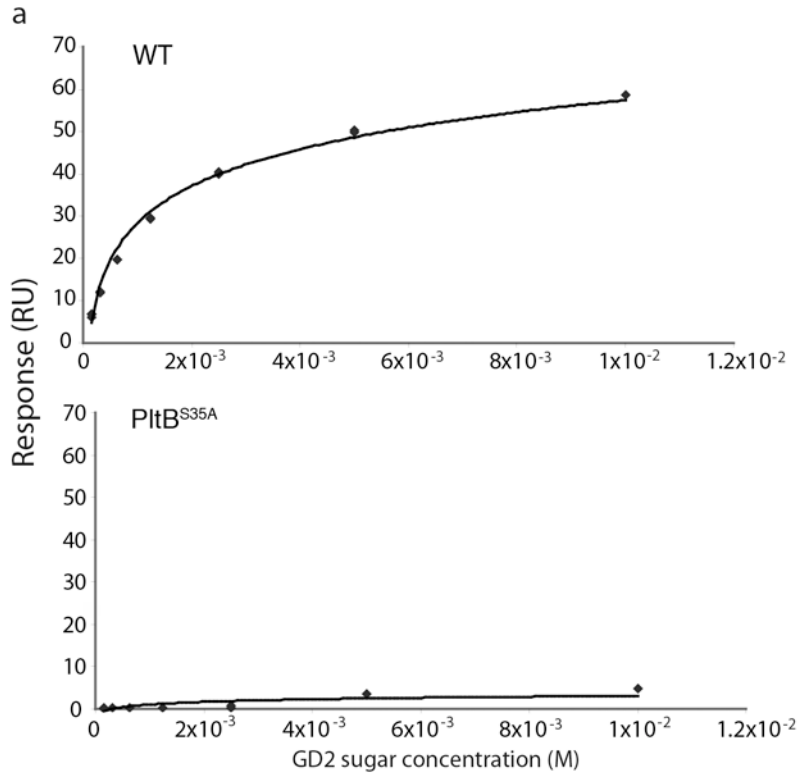

**Supplementary Figure S12.** Ser35 is critical for typhoid toxin glycan binding. Surface plasmon resonance assay of the binding of wild type (WT) and PltB<sup>S35A</sup> typhoid toxin preparations to the GD2 glycan. Numbers on the y axis depict the relative response units (RU). Binding curves were generated by averaging the values several independent determinations. The observed R<sub>max</sub> suggests that ~ 50% of protein remains active when captured by an anti-flag antibody. Such R<sub>max</sub> values strongly suggest that, for wild type, on average there are 2.5 sugar molecules per PltB pentamer assuming that each monomer is 100% active for binding.

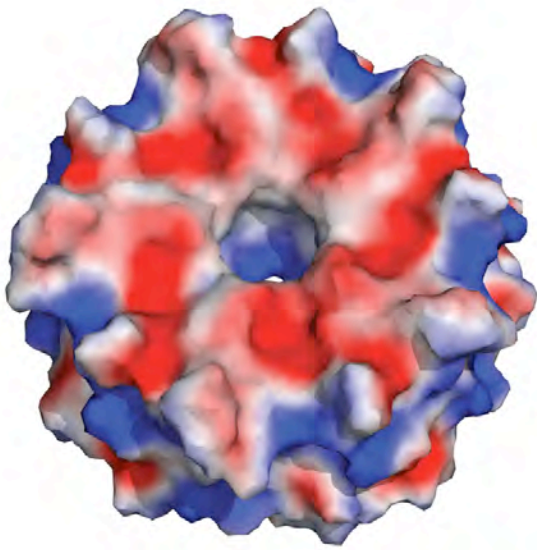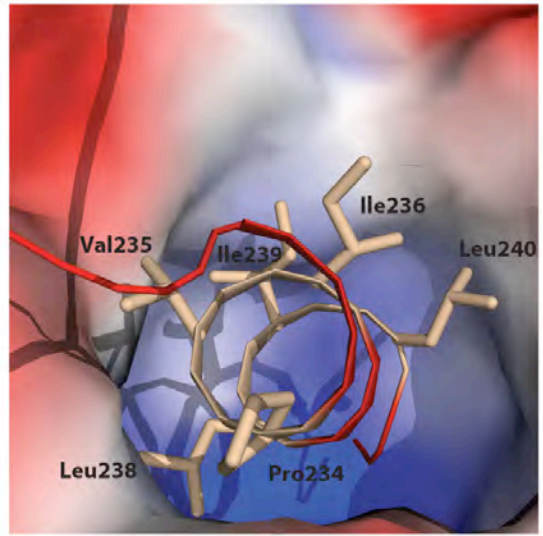

Negative  Positive  
Electrostatic potential

**Supplementary Figure S13.** Surface charge distribution of the PltB pentamer depicting its hydrophobic channel (left panel). The interaction of key PltA residue with the lumen of the PltB channel is shown in detail (right panel).

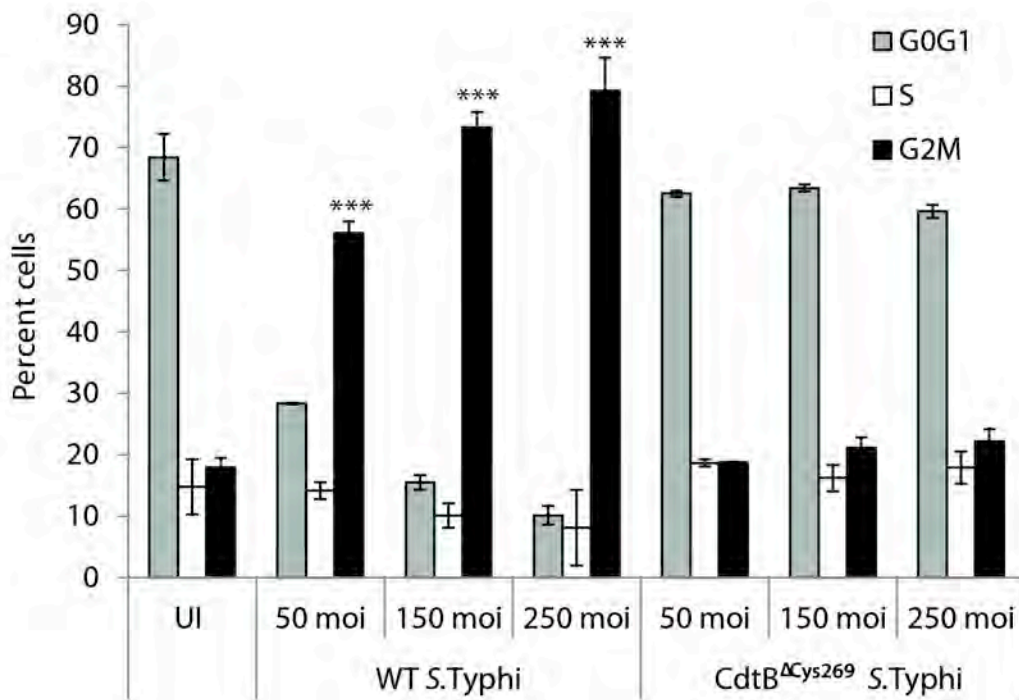

**Supplementary Figure S14.** An *S. Typhi* *cdtB<sup>ΔCys269</sup>* mutant does not intoxicate culture cells. Henle-407 cells were left uninfected or infected for 4 days with wild type *S. Typhi* or a *cdtB<sup>ΔCys269</sup>* mutant at various multiplicity of infections (moi) as indicated. Typhoid toxin mediated toxicity was evaluated by flow cytometric cell cycle analysis. Bar represents the average  $\pm$  standard deviation. \*\*\*, P < 0.001 compared to the number of cells in G2M in the uninfected (UI) group.

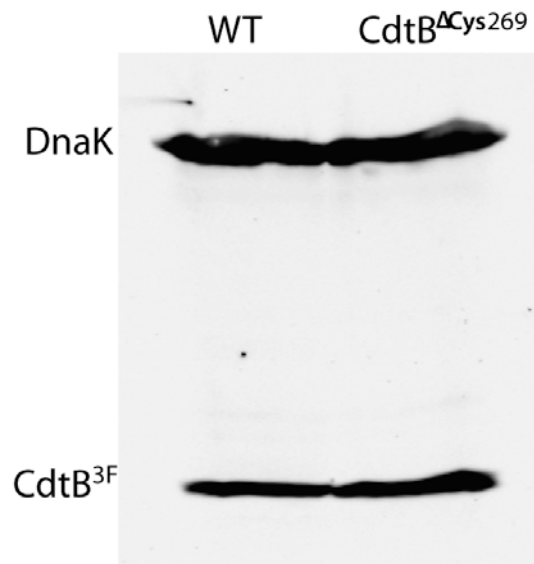

**Supplementary Figure S15.** Expression of CdtB<sup>ΔCys269</sup> in *S. Typhi* infected culture epithelial cells. Henle-407 cells were infected with *S. Typhi* strains expressing FLAG-epitope tag wild type CdtB or CdtB<sup>ΔCys269</sup> and 24 hs after infection, the levels of CdtB in cell lysates was investigated by western blot analysis. The bacterial protein DnaK was used as a loading control. Equivalent results were obtained in at least three repetition of this experiment.



Table S1: Glycans showing typhoid toxin binding activity classified by their structural features

**Group 1: Sialo-N-glycans**

| Glycan Number                    | Glycan structure                                                                                                                              | Average RFU | StDev | % CV |
|----------------------------------|-----------------------------------------------------------------------------------------------------------------------------------------------|-------------|-------|------|
| 461                              | Neu5Aca2-3Galb1-4GlcNAcb1-6(Neu5Aca2-3Galb1-4GlcNAcb1-2)Mana1-6(GlcNAcb1-4)(Neu5Aca2-3Galb1-4GlcNAcb1-2)Mana1-3)Manb1-4GlcNAcb1-4GlcNAcb-Sp21 | 12301       | 2330  | 19   |
| 483                              | Neu5Aca2-3Galb1-4GlcNAcb1-2Mana1-6(Neu5Aca2-3Galb1-4GlcNAcb1-2)Mana1-3)Manb1-4GlcNAcb1-4(Fuca1-6)GlcNAcb-Sp24                                 | 3626        | 162   | 4    |
| 459                              | Neu5Aca2-3Galb1-4GlcNAcb1-2Mana1-6(GlcNAcb1-4)(Neu5Aca2-3Galb1-4GlcNAcb1-2)Mana1-3)Manb1-4GlcNAcb1-4GlcNAcb-Sp21                              | 1940        | 286   | 15   |
| 474                              | Neu5Aca2-3Galb1-3GlcNAcb1-6(Neu5Aca2-3Galb1-3GlcNAcb1-2)Mana1-6(Neu5Aca2-3Galb1-3GlcNAcb1-2)Mana1-3)Manb1-4GlcNAcb1-4GlcNAcb-Sp19             | 1079        | 48    | 4    |
| 57                               | Neu5Aca2-6Galb1-4GlcNAcb1-2Mana1-6(Neu5Aca2-6Galb1-4GlcNAcb1-2)Mana1-3)Manb1-4GlcNAcb1-4GlcNAcb-Sp24                                          | 492         | 134   | 27   |
| 318                              | Neu5Aca2-6Galb1-4GlcNAcb1-2Mana1-6(Neu5Aca2-3Galb1-4GlcNAcb1-2)Mana1-3)Manb1-4GlcNAcb1-4GlcNAcb-Sp12                                          | 467         | 92    | 20   |
| 301                              | Neu5Aca2-6Galb1-4GlcNAcb1-2Mana1-8(Galb1-4GlcNAcb1-2)Mana1-3)Manb1-4GlcNAcb1-4GlcNAcb-Sp12                                                    | 254         | 49    | 19   |
| 482                              | Neu5Aca2-6Galb1-4GlcNAcb1-2Mana1-6(Neu5Aca2-6Galb1-4GlcNAcb1-2)Mana1-3)Manb1-4GlcNAcb1-4(Fuca1-6)GlcNAcb-Sp24                                 | 228         | 13    | 6    |
| 463                              | Neu5Aca2-6Galb1-4GlcNAcb1-2Mana1-6(GlcNAcb1-4)(Neu5Aca2-6Galb1-4GlcNAcb1-2)Mana1-3)Manb1-4GlcNAcb1-4GlcNAcb-Sp21                              | 209         | 17    | 8    |
| 543                              | Neu5Gca2-3Galb1-4GlcNAcb1-3Galb1-4GlcNAcb1-2Mana1-6(Neu5Gca2-3Galb1-4GlcNAcb1-3Galb1-4GlcNAcb1-2)Mana1-3)Manb1-4GlcNAcb1-4GlcNAcb-Sp24        | 146         | 18    | 12   |
| <b>Average RFU for the group</b> |                                                                                                                                               | <b>2074</b> |       |      |

**Group 2: Asialo-N-glycans**

| Glycan Number                    | Glycan structure                                                                                                                                                                                                                                                      | Average RFU | StDev | % CV |
|----------------------------------|-----------------------------------------------------------------------------------------------------------------------------------------------------------------------------------------------------------------------------------------------------------------------|-------------|-------|------|
| 544                              | Fuca1-2Galb1-4GlcNAcb1-3Galb1-4GlcNAcb1-2Mana1-6(Fuca1-2Galb1-4GlcNAcb1-3Galb1-4GlcNAcb1-2)Mana1-3)Manb1-4GlcNAcb1-4GlcNAcb-Sp24                                                                                                                                      | 4738        | 1381  | 29   |
| 588                              | Galb1-4GlcNAcb1-3Galb1-4GlcNAcb1-3Galb1-4GlcNAcb1-3Galb1-4GlcNAcb1-3Galb1-4GlcNAcb1-6(Galb1-4GlcNAcb1-3Galb1-4GlcNAcb1-3Galb1-4GlcNAcb1-2)Mana1-6(Galb1-4GlcNAcb1-3Galb1-4GlcNAcb1-3Galb1-4GlcNAcb1-3Galb1-4GlcNAcb1-2)Mana1-3)Manb1-4GlcNAcb1-4(Fuca1-6)GlcNAcb-Sp24 | 2248        | 390   | 17   |
| 584                              | Galb1-4GlcNAcb1-3Galb1-4GlcNAcb1-3Galb1-4GlcNAcb1-6(Galb1-4GlcNAcb1-3Galb1-4GlcNAcb1-3Galb1-4GlcNAcb1-2)Mana1-6(Galb1-4GlcNAcb1-3Galb1-4GlcNAcb1-3Galb1-4GlcNAcb1-2)Mana1-3)Manb1-4GlcNAcb1-4(Fuca1-6)GlcNAcb-Sp24                                                    | 1902        | 82    | 4    |
| 550                              | Galb1-4GlcNAcb1-3Galb1-4GlcNAcb1-3Galb1-4GlcNAcb1-3Galb1-4GlcNAcb1-2Mana1-6(Galb1-4GlcNAcb1-3Galb1-4GlcNAcb1-3Galb1-4GlcNAcb1-3Galb1-4GlcNAcb1-2)Mana1-3)Manb1-4GlcNAcb1-4GlcNAcb-Sp25                                                                                | 1258        | 303   | 24   |
| 542                              | Galb1-4GlcNAcb1-3Galb1-4GlcNAcb1-2Mana1-6(Galb1-4GlcNAcb1-3Galb1-4GlcNAcb1-2)Mana1-3)Manb1-4GlcNAcb1-4GlcNAcb-Sp24                                                                                                                                                    | 606         | 156   | 26   |
| 548                              | Galb1-4GlcNAcb1-3Galb1-4GlcNAcb1-3Galb1-4GlcNAcb1-2Mana1-6(Galb1-4GlcNAcb1-3Galb1-4GlcNAcb1-3Galb1-4GlcNAcb1-2)Mana1-3)Manb1-4GlcNAcb1-4GlcNAcb-Sp24                                                                                                                  | 281         | 23    | 8    |
| 579                              | Galb1-4GlcNAcb1-3Galb1-4GlcNAcb1-3Galb1-4GlcNAcb1-3Galb1-4GlcNAcb1-2Mana1-6(Galb1-4GlcNAcb1-3Galb1-4GlcNAcb1-3Galb1-4GlcNAcb1-3Galb1-4GlcNAcb1-2)Mana1-3)Manb1-4GlcNAcb1-4(Fuca1-6)GlcNAcb-Sp24                                                                       | 250         | 26    | 10   |
| 445                              | Fuca1-2Galb1-4GlcNAcb1-2Mana1-6(Fuca1-2Galb1-4GlcNAcb1-2)(Fuca1-2Galb1-4GlcNAcb1-4)Mana1-3)Manb1-4GlcNAcb1-4GlcNAcb-Sp12                                                                                                                                              | 188         | 36    | 19   |
| <b>Average RFU for the group</b> |                                                                                                                                                                                                                                                                       | <b>1434</b> |       |      |

**Group 3: Sialo-glycolipids**

| Glycan Number                    | Glycan structure                                                     | Average RFU | StDev | % CV |
|----------------------------------|----------------------------------------------------------------------|-------------|-------|------|
| 228                              | GalNAcb1-4(Neu5Aca2-8Neu5Aca2-3)Galb1-4Glc-Sp0                       | 9582        | 1645  | 17   |
| 276                              | Neu5Aca2-8Neu5Aca2-3Galb1-4Glc-Sp0                                   | 3702        | 464   | 13   |
| 573                              | Neu5Aca2-8Neu5Aca2-3Galb1-3GalNAcb1-4(Neu5Aca2-3)Galb1-4Glc-Sp21     | 3255        | 503   | 15   |
| 226                              | GalNAcb1-4(Neu5Aca2-8Neu5Aca2-3)Galb1-4Glc-Sp0                       | 1726        | 136   | 8    |
| 411                              | Galb1-3GalNAcb1-4(Neu5Aca2-8Neu5Aca2-3)Galb1-4Glc-Sp0                | 827         | 107   | 13   |
| 456                              | Neu5Aca2-6Galb1-4GlcNAcb1-6(Fuca1-2Galb1-3GlcNAcb1-3)Galb1-4Glc-Sp21 | 467         | 79    | 17   |
| <b>Average RFU for the group</b> |                                                                      | <b>3260</b> |       |      |

**Group 4: Sialo-O-glycans**

| Glycan Number                    | Glycan structure                                               | Average RFU | StDev | % CV |
|----------------------------------|----------------------------------------------------------------|-------------|-------|------|
| 243                              | Neu5Aca2-6(Neu5Aca2-3Galb1-3)GalNAca-Sp8                       | 1656        | 219   | 13   |
| 266                              | Neu5Aca2-6GalNAcb1-4GlcNAcb-Sp0                                | 1100        | 147   | 13   |
| 267                              | Neu5Aca2-6Galb1-4(6S)GlcNAcb-Sp8                               | 419         | 93    | 22   |
| 295                              | Neu5Aca2-3Galb1-4GlcNAcb1-3Galb1-3GlcNAcb-Sp0                  | 358         | 72    | 20   |
| 268                              | Neu5Aca2-6Galb1-4GlcNAcb-Sp0                                   | 311         | 33    | 11   |
| 332                              | Neu5Aca2-6Galb1-4GlcNAcb1-3Galb1-4GlcNAcb1-3Galb1-4GlcNAcb-Sp0 | 228         | 32    | 14   |
| <b>Average RFU for the group</b> |                                                                | <b>679</b>  |       |      |

Table S2: Glycan array analysis for binding to typhoid toxin (highlighted in grey are Glycans present in glycolipids)

| Glycan number | Glycan structure                                                                                                                                                                                                                                                                                        | Average RFU | StDev | % CV |
|---------------|---------------------------------------------------------------------------------------------------------------------------------------------------------------------------------------------------------------------------------------------------------------------------------------------------------|-------------|-------|------|
| 461           | Neu5Aca2-3Galb1-4GlcNAcb1-6(Neu5Aca2-3Galb1-4GlcNAcb1-2)Mana1-6(GlcNAcb1-4)(Neu5Aca2-3Galb1-4GlcNAcb1-2Mana1-3)Manb1-4GlcNAcb1-4GlcNAcb-Sp21                                                                                                                                                            | 12301       | 2330  | 19   |
| 228           | GalNAcb1-4(Neu5Aca2-8Neu5Aca2-3)Galb1-4Glc-Sp0                                                                                                                                                                                                                                                          | 9582        | 1645  | 17   |
| 509           | Galb1-3GlcNAca1-3Galb1-4GlcNAcb-Sp8                                                                                                                                                                                                                                                                     | 8373        | 585   | 7    |
| 460           | Neu5Aca2-3Galb1-4GlcNAcb1-4Mana1-6(GlcNAcb1-4)(Neu5Aca2-3Galb1-4GlcNAcb1-4)(Neu5Aca2-3Galb1-4GlcNAcb1-2)Mana1-3)Manb1-4GlcNAcb1-4GlcNAcb-Sp21                                                                                                                                                           | 7186        | 4337  | 60   |
| 544           | Fuca1-2Galb1-4GlcNAcb1-3Galb1-4GlcNAcb1-2Mana1-6(Fuca1-2Galb1-4GlcNAcb1-3Galb1-4GlcNAcb1-2Mana1-3)Manb1-4GlcNAcb1-4GlcNAcb-Sp24                                                                                                                                                                         | 4738        | 1381  | 29   |
| 276           | Neu5Aca2-8Neu5Aca2-3Galb1-4Glc-Sp0                                                                                                                                                                                                                                                                      | 3702        | 464   | 13   |
| 483           | Neu5Aca2-3Galb1-4GlcNAcb1-2Mana1-6(Neu5Aca2-3Galb1-4GlcNAcb1-2Mana1-3)Manb1-4GlcNAcb1-4(Fuca1-6)GlcNAcb-Sp24                                                                                                                                                                                            | 3626        | 162   | 4    |
| 573           | Neu5Aca2-8Neu5Aca2-3Galb1-3GalNAcb1-4(Neu5Aca2-3)Galb1-4Glc-Sp21                                                                                                                                                                                                                                        | 3255        | 503   | 15   |
| 74            | Fuca1-2Galb1-4GlcNAcb1-3Galb1-4GlcNAcb1-3Galb1-4GlcNAcb-Sp0                                                                                                                                                                                                                                             | 2999        | 963   | 32   |
| 335           | GalNAca1-3(Fuca1-2)Galb1-4GlcNAcb1-3Galb1-4GlcNAcb-Sp0                                                                                                                                                                                                                                                  | 2690        | 186   | 7    |
| 462           | Neu5Aca2-3Galb1-4GlcNAcb1-6(Neu5Aca2-3Galb1-4GlcNAcb1-2)Mana1-6(GlcNAcb1-4)(Neu5Aca2-3Galb1-4GlcNAcb1-4)(Neu5Aca2-3Galb1-4GlcNAcb1-2)Mana1-3)Manb1-4GlcNAcb1-4GlcNAcb-Sp21                                                                                                                              | 2574        | 2879  | 112  |
| 588           | Galb1-4GlcNAcb1-3Galb1-4GlcNAcb1-3Galb1-4GlcNAcb1-3Galb1-4GlcNAcb1-3Galb1-4GlcNAcb1-6(Galb1-4GlcNAcb1-3Galb1-4GlcNAcb1-3Galb1-4GlcNAcb1-3Galb1-4GlcNAcb1-2)Mana1-6(Galb1-4GlcNAcb1-3Galb1-4GlcNAcb1-3Galb1-4GlcNAcb1-3Galb1-4GlcNAcb1-3Galb1-4GlcNAcb1-2)Mana1-3)Manb1-4GlcNAcb1-4(Fuca1-6)GlcNAcb-Sp24 | 2248        | 390   | 17   |
| 73            | Fuca1-2Galb1-4GlcNAcb1-3Galb1-4GlcNAcb-Sp0                                                                                                                                                                                                                                                              | 2217        | 746   | 34   |
| 586           | Galb1-4GlcNAcb1-3Galb1-4GlcNAcb1-3Galb1-4GlcNAcb1-3Galb1-4GlcNAcb1-6(Galb1-4GlcNAcb1-3Galb1-4GlcNAcb1-3Galb1-4GlcNAcb1-3Galb1-4GlcNAcb1-2)Mana1-3)Manb1-4GlcNAcb1-4(Fuca1-6)GlcNAcb-Sp24                                                                                                                | 2115        | 801   | 38   |
| 459           | Neu5Aca2-3Galb1-4GlcNAcb1-2Mana1-6(GlcNAcb1-4)(Neu5Aca2-3Galb1-4GlcNAcb1-2Mana1-3)Manb1-4GlcNAcb1-4GlcNAcb-Sp21                                                                                                                                                                                         | 1940        | 286   | 15   |
| 584           | Galb1-4GlcNAcb1-3Galb1-4GlcNAcb1-3Galb1-4GlcNAcb1-6(Galb1-4GlcNAcb1-3Galb1-4GlcNAcb1-3Galb1-4GlcNAcb1-2)Mana1-6(Galb1-4GlcNAcb1-3Galb1-4GlcNAcb1-2)Mana1-3)Manb1-4GlcNAcb1-4(Fuca1-6)GlcNAcb-Sp24                                                                                                       | 1902        | 82    | 4    |
| 226           | GalNAcb1-4(Neu5Aca2-8Neu5Aca2-3)Galb1-4Glc-Sp0                                                                                                                                                                                                                                                          | 1726        | 136   | 8    |
| 243           | Neu5Aca2-6(Neu5Aca2-3Galb1-3)GalNAca-Sp8                                                                                                                                                                                                                                                                | 1656        | 219   | 13   |
| 326           | Neu5Aca2-3Galb1-4GlcNAcb1-2Mana1-6(Neu5Aca2-6Galb1-4GlcNAcb1-2Mana1-3)Manb1-4GlcNAcb1-4GlcNAcb-Sp12                                                                                                                                                                                                     | 1636        | 1545  | 94   |
| 336           | GalNAca1-3(Fuca1-2)Galb1-4GlcNAcb1-3Galb1-4GlcNAcb1-3Galb1-4GlcNAcb-Sp0                                                                                                                                                                                                                                 | 1326        | 355   | 27   |
| 550           | Galb1-4GlcNAcb1-3Galb1-4GlcNAcb1-3Galb1-4GlcNAcb1-3Galb1-4GlcNAcb1-2)Mana1-6(Galb1-4GlcNAcb1-3Galb1-4GlcNAcb1-3Galb1-4GlcNAcb1-3Galb1-4GlcNAcb1-2)Mana1-3)Manb1-4GlcNAcb1-4GlcNAcb-Sp25                                                                                                                 | 1258        | 303   | 24   |
| 266           | Neu5Aca2-6GalNAcb1-4GlcNAcb-Sp0                                                                                                                                                                                                                                                                         | 1100        | 147   | 13   |
| 474           | Neu5Aca2-3Galb1-3GlcNAcb1-6(Neu5Aca2-3Galb1-3GlcNAcb1-2)Mana1-6(Neu5Aca2-3Galb1-3GlcNAcb1-2)Mana1-3)Manb1-4GlcNAcb1-4GlcNAcb-Sp19                                                                                                                                                                       | 1079        | 48    | 4    |
| 411           | Galb1-3GalNAcb1-4(Neu5Aca2-8Neu5Aca2-3)Galb1-4Glc-Sp0                                                                                                                                                                                                                                                   | 827         | 107   | 13   |
| 542           | Galb1-4GlcNAcb1-3Galb1-4GlcNAcb1-2Mana1-6(Galb1-4GlcNAcb1-3Galb1-4GlcNAcb1-2)Mana1-3)Manb1-4GlcNAcb1-4GlcNAcb-Sp24                                                                                                                                                                                      | 606         | 156   | 26   |
| 57            | Neu5Aca2-6Galb1-4GlcNAcb1-2Mana1-6(Neu5Aca2-6Galb1-4GlcNAcb1-2)Mana1-3)Manb1-4GlcNAcb1-4GlcNAcb-Sp24                                                                                                                                                                                                    | 492         | 134   | 27   |
| 318           | Neu5Aca2-6Galb1-4GlcNAcb1-2Mana1-6(Neu5Aca2-3Galb1-4GlcNAcb1-2)Mana1-3)Manb1-4GlcNAcb1-4GlcNAcb-Sp12                                                                                                                                                                                                    | 467         | 92    | 20   |
| 456           | Neu5Aca2-6Galb1-4GlcNAcb1-6(Fuca1-2Galb1-3GlcNAcb1-3)Galb1-4Glc-Sp21                                                                                                                                                                                                                                    | 467         | 79    | 17   |
| 267           | Neu5Aca2-6Galb1-4(6S)GlcNAcb-Sp8                                                                                                                                                                                                                                                                        | 419         | 93    | 22   |
| 135           | Neu5Aca2-6(Galb1-3)GalNAca-Sp8                                                                                                                                                                                                                                                                          | 365         | 215   | 59   |
| 295           | Neu5Aca2-3Galb1-4GlcNAcb1-3Galb1-3GlcNAcb-Sp0                                                                                                                                                                                                                                                           | 358         | 72    | 20   |
| 268           | Neu5Aca2-6Galb1-4GlcNAcb-Sp0                                                                                                                                                                                                                                                                            | 311         | 33    | 11   |
| 548           | Galb1-4GlcNAcb1-3Galb1-4GlcNAcb1-3Galb1-4GlcNAcb1-2)Mana1-6(Galb1-4GlcNAcb1-3Galb1-4GlcNAcb1-3Galb1-4GlcNAcb1-2)Mana1-3)Manb1-4GlcNAcb1-4GlcNAcb-Sp24                                                                                                                                                   | 281         | 23    | 8    |
| 301           | Neu5Aca2-6Galb1-4GlcNAcb1-2)Mana1-6(Galb1-4GlcNAcb1-2)Mana1-3)Manb1-4GlcNAcb1-4GlcNAcb-Sp12                                                                                                                                                                                                             | 254         | 49    | 19   |
| 579           | Galb1-4GlcNAcb1-3Galb1-4GlcNAcb1-3Galb1-4GlcNAcb1-3Galb1-4GlcNAcb1-2)Mana1-6(Galb1-4GlcNAcb1-3Galb1-4GlcNAcb1-3Galb1-4GlcNAcb1-3Galb1-4GlcNAcb1-2)Mana1-3)Manb1-4GlcNAcb1-4(Fuca1-6)GlcNAcb-Sp24                                                                                                        | 250         | 26    | 10   |
| 523           | GalNAca1-3(Fuca1-2)Galb1-4GlcNAcb1-2)Mana-Sp0                                                                                                                                                                                                                                                           | 239         | 20    | 8    |
| 441           | Neu5Aca2-3Galb1-4GlcNAcb1-3Galb-Sp8                                                                                                                                                                                                                                                                     | 234         | 93    | 40   |
| 332           | Neu5Aca2-6Galb1-4GlcNAcb1-3Galb1-4GlcNAcb1-3Galb1-4GlcNAcb-Sp0                                                                                                                                                                                                                                          | 228         | 32    | 14   |
| 482           | Neu5Aca2-6Galb1-4GlcNAcb1-2)Mana1-6(Neu5Aca2-6Galb1-4GlcNAcb1-2)Mana1-3)Manb1-4GlcNAcb1-4(Fuca1-6)GlcNAcb-Sp24                                                                                                                                                                                          | 228         | 13    | 6    |
| 463           | Neu5Aca2-6Galb1-4GlcNAcb1-2)Mana1-6(GlcNAcb1-4)(Neu5Aca2-6Galb1-4GlcNAcb1-2)Mana1-3)Manb1-4GlcNAcb1-4GlcNAcb-Sp21                                                                                                                                                                                       | 209         | 17    | 8    |
| 325           | Neu5Aca2-3Galb1-4GlcNAcb1-2)Mana1-6(Neu5Aca2-3Galb1-4GlcNAcb1-2)Mana1-3)Manb1-4GlcNAcb1-4GlcNAcb-Sp12                                                                                                                                                                                                   | 195         | 188   | 97   |
| 445           | Fuca1-2Galb1-4GlcNAcb1-2)Mana1-6(Fuca1-2Galb1-4GlcNAcb1-2)(Fuca1-2Galb1-4GlcNAcb1-4)Mana1-3)Manb1-4GlcNAcb1-4GlcNAcb-Sp12                                                                                                                                                                               | 188         | 36    | 19   |
| 258           | Neu5Aca2-3Galb1-4GlcNAcb1-3Galb1-4GlcNAcb1-3Galb1-4GlcNAcb-Sp0                                                                                                                                                                                                                                          | 161         | 84    | 52   |
| 322           | Neu5Aca2-8Neu5Aca2-8Neu5Acb-Sp8                                                                                                                                                                                                                                                                         | 147         | 62    | 42   |
| 543           | Neu5Gca2-3Galb1-4GlcNAcb1-3Galb1-4GlcNAcb1-2)Mana1-6(Neu5Gca2-3Galb1-4GlcNAcb1-3Galb1-4GlcNAcb1-2)Mana1-3)Manb1-4GlcNAcb1-4GlcNAcb-Sp24                                                                                                                                                                 | 146         | 18    | 12   |
| 519           | GalNAca1-3(Fuca1-2)Galb1-4GlcNAcb1-6GalNAc-Sp14                                                                                                                                                                                                                                                         | 126         | 117   | 92   |
| 222           | Fuca1-2(6S)Galb1-4(6S)Glc-Sp0                                                                                                                                                                                                                                                                           | 118         | 211   | 179  |
| 465           | Neu5Aca2-6Galb1-4GlcNAcb1-6(Neu5Aca2-6Galb1-4GlcNAcb1-2)Mana1-6(GlcNAcb1-4)(Neu5Aca2-6Galb1-4GlcNAcb1-2)Mana1-3)Manb1-4GlcNAcb1-4GlcNAcb-Sp21                                                                                                                                                           | 117         | 20    | 18   |
| 261           | Neu5Aca2-3Galb1-4GlcNAcb1-3Galb1-4GlcNAcb-Sp0                                                                                                                                                                                                                                                           | 114         | 46    | 41   |
| 253           | Neu5Aca2-3Galb1-4(Fuca1-3)GlcNAcb1-3Galb1-4(Fuca1-3)GlcNAcb1-3Galb1-4(Fuca1-3)GlcNAcb-Sp0                                                                                                                                                                                                               | 105         | 21    | 20   |
| 256           | Neu5Aca2-3Galb1-4(Fuca1-3)GlcNAcb1-3Galb-Sp8                                                                                                                                                                                                                                                            | 102         | 30    | 30   |
| 265           | Neu5Aca2-6GalNAca-Sp8                                                                                                                                                                                                                                                                                   | 94          | 50    | 54   |
| 373           | GalNAca1-3(Fuca1-2)Galb1-3GlcNAcb1-2)Mana1-6(GalNAca1-3(Fuca1-2)Galb1-3GlcNAcb1-2)Mana1-3)Manb1-4GlcNAcb1-4GlcNAcb-Sp20                                                                                                                                                                                 | 92          | 113   | 123  |
| 565           | Galb1-4GlcNAcb1-3Galb1-4GlcNAcb1-3Galb1-4GlcNAcb1-3Galb1-4GlcNAcb1-3Galb1-4GlcNAcb1-2)Mana1-6(Galb1-4GlcNAcb1-3Galb1-4GlcNAcb1-3Galb1-4GlcNAcb1-3Galb1-4GlcNAcb1-2)Mana1-3)Manb1-4GlcNAcb1-4GlcNAcb-Sp25                                                                                                | 91          | 25    | 27   |
| 229           | Neu5Aca2-8Neu5Aca2-8Neu5Aca-Sp8                                                                                                                                                                                                                                                                         | 90          | 38    | 42   |
| 485           | Galb1-4GlcNAcb1-6(Galb1-4GlcNAcb1-2)Mana1-6(Galb1-4GlcNAcb1-2)Mana1-3)Manb1-4GlcNAcb1-4(Fuca1-6)GlcNAcb-Sp24                                                                                                                                                                                            | 86          | 116   | 136  |

|     |                                                                                                                                                                         |    |     |     |
|-----|-------------------------------------------------------------------------------------------------------------------------------------------------------------------------|----|-----|-----|
| 67  | Fuca1-2Galb1-3GlcNAcb-Sp0                                                                                                                                               | 78 | 42  | 54  |
| 439 | Galb1-4Galb-Sp10                                                                                                                                                        | 78 | 27  | 34  |
| 541 | Galb1-4GlcNAcb1-3Galb1-4GlcNAcb1-2Mana1-6(Galb1-4GlcNAcb1-3Galb1-4GlcNAcb1-2Mana1-3)Manb1-4GlcNAcb1-4GlcNAcb-Sp12                                                       | 77 | 98  | 127 |
| 225 | GalNAcb1-4(Neu5Aca2-8Neu5Aca2-8Neu5Aca2-3)Galb1-4Glc-Sp0                                                                                                                | 77 | 62  | 81  |
| 241 | Neu5Aca2-3Galb1-4(Neu5Aca2-3Galb1-3)GlcNAcb-Sp8                                                                                                                         | 76 | 33  | 44  |
| 606 | Neu5Aca2-6Galb1-4GlcNAcb1-3Galb1-4GlcNAcb1-3Galb1-4GlcNAcb1-2Mana1-6(Neu5Aca2-6Galb1-4GlcNAcb1-3Galb1-4GlcNAcb1-3Galb1-4GlcNAcb1-2Mana1-3)Manb1-4GlcNAcb1-4GlcNAcb-Sp12 | 76 | 35  | 46  |
| 361 | Fuca1-2Galb1-4GlcNAcb1-2Mana1-6(Fuca1-2Galb1-4GlcNAcb1-2Mana1-3)Manb1-4GlcNAcb1-4GlcNAcb-Sp20                                                                           | 76 | 34  | 45  |
| 557 | Neu5Aca2-8Neu5Aca2-3Galb1-4GlcNAcb-Sp0                                                                                                                                  | 75 | 23  | 30  |
| 577 | Galb1-4GlcNAcb1-3Galb1-4GlcNAcb1-3Galb1-4GlcNAcb1-2Mana1-6(Galb1-4GlcNAcb1-3Galb1-4GlcNAcb1-3Galb1-4GlcNAcb1-2Mana1-3)Manb1-4GlcNAcb1-4(Fuca1-6)GlcNAcb-Sp24            | 71 | 18  | 25  |
| 91  | GalNAca1-3GalNAcb-Sp8                                                                                                                                                   | 66 | 50  | 76  |
| 558 | GlcNAcb1-3Galb1-4GlcNAcb1-6(GlcNAcb1-3Galb1-4GlcNAcb1-2)Mana1-6(GlcNAcb1-3Galb1-4GlcNAcb1-2Man a1-3)Manb1-4GlcNAcb1-4GlcNAcb-Sp24                                       | 61 | 24  | 39  |
| 244 | Neu5Aca2-6(Neu5Aca2-3Galb1-3)GalNAca-Sp14                                                                                                                               | 60 | 39  | 65  |
| 49  | Neu5,9Ac2a2-6Galb1-4GlcNAcb-Sp8                                                                                                                                         | 59 | 33  | 55  |
| 252 | Neu5Aca2-3Galb1-4(Fuca1-3)(6S)GlcNAcb-Sp8                                                                                                                               | 59 | 25  | 42  |
| 263 | Neu5Aca2-3Galb1-4Glc-Sp0                                                                                                                                                | 58 | 11  | 19  |
| 227 | Neu5Aca2-8Neu5Aca2-8Neu5Aca2-3Galb1-4Glc-Sp0                                                                                                                            | 57 | 41  | 72  |
| 44  | (6S)Galb1-4GlcNAcb-Sp8                                                                                                                                                  | 56 | 29  | 52  |
| 530 | GlcNAcb1-2 Mana1-6(GlcNAcb1-4)(GlcNAcb1-2Mana1-3)Manb1-4GlcNAcb1-4(Fuca1-6)GlcNAcb-Sp21                                                                                 | 54 | 104 | 192 |
| 362 | Fuca1-2Galb1-4(Fuca1-3)GlcNAcb1-2Mana1-6(Fuca1-2Galb1-4(Fuca1-3)GlcNAcb1-2Mana1-3)Manb1-4GlcNAcb1-4GlcNAcb-Sp20                                                         | 50 | 64  | 126 |
| 553 | Neu5Aca2-8Neu5Gca2-3Galb1-4GlcNAcb-Sp0                                                                                                                                  | 50 | 21  | 42  |
| 487 | Neu5Aca2-6Galb1-4GlcNAcb1-6(Fuca1-2Galb1-4(Fuca1-3)GlcNAcb1-3)Galb1-4Glc-Sp21                                                                                           | 50 | 71  | 144 |
| 448 | Galb1-4GlcNAcb1-2Mana-Sp0                                                                                                                                               | 49 | 22  | 44  |
| 136 | Neu5Aca2-6(Galb1-3)GalNAca-Sp14                                                                                                                                         | 49 | 50  | 101 |
| 552 | Neu5Gca2-8Neu5Gca2-3Galb1-4GlcNAcb-Sp0                                                                                                                                  | 49 | 31  | 64  |
| 69  | Fuca1-2Galb1-4(Fuca1-3)GlcNAcb1-3Galb1-4(Fuca1-3)GlcNAcb-Sp0                                                                                                            | 49 | 21  | 43  |
| 46  | Neu5Aca2-3(6S)Galb1-4GlcNAcb-Sp8                                                                                                                                        | 49 | 11  | 23  |
| 364 | Galb1-4GlcNAcb1-2Mana1-6(Mana1-3)Manb1-4GlcNAcb1-4GlcNAcb-Sp12                                                                                                          | 49 | 23  | 48  |
| 317 | Neu5Aca2-3Galb1-4GlcNAcb1-6(Neu5Aca2-3Galb1-3)GalNAca-Sp14                                                                                                              | 48 | 32  | 66  |
| 546 | GlcNAcb1-3Galb1-4GlcNAcb1-3Galb1-4GlcNAcb1-2Mana1-6(GlcNAcb1-3Galb1-4GlcNAcb1-3Galb1-4GlcNAcb1-2Mana1-3)Manb1-4GlcNAcb1-4GlcNAcb-Sp25                                   | 48 | 53  | 111 |
| 572 | Galb1-3GlcNAcb1-3Galb1-4GlcNAcb1-6(Galb1-3GlcNAcb1-3Galb1-4GlcNAcb1-2)Mana1-6(Galb1-3GlcNAcb1-3Galb1-4GlcNAcb1-2Mana1-3)Manb1-4GlcNAcb1-4(Fuca1-6)GlcNAcb-Sp24          | 47 | 45  | 97  |
| 247 | Neu5Aca2-3Galb1-3GlcNAcb1-3Galb1-4GlcNAcb-Sp0                                                                                                                           | 46 | 48  | 103 |
| 6   | Fuca-Sp8                                                                                                                                                                | 46 | 15  | 33  |
| 531 | Galb1-4GlcNAcb1-2 Mana1-6(GlcNAcb1-4)(Galb1-4GlcNAcb1-2Mana1-3)Manb1-4GlcNAcb1-4(Fuca1-6)GlcNAcb-Sp21                                                                   | 46 | 22  | 47  |
| 187 | GlcNAcb1-6(GlcNAcb1-4)GalNAca-Sp8                                                                                                                                       | 45 | 31  | 68  |
| 270 | Neu5Aca2-6Galb1-4GlcNAcb1-3Galb1-4(Fuca1-3)GlcNAcb1-3Galb1-4(Fuca1-3)GlcNAcb-Sp0                                                                                        | 45 | 11  | 25  |
| 141 | Galb1-3GalNAca-Sp16                                                                                                                                                     | 45 | 62  | 138 |
| 415 | GalNAca1-3GalNAcb1-3Gala1-4Galb1-4Glc-Sp0                                                                                                                               | 44 | 24  | 55  |
| 281 | Neu5Gca2-3Galb1-3GlcNAcb-Sp0                                                                                                                                            | 43 | 33  | 76  |
| 376 | Neu5Aca2-3Galb1-4GlcNAcb1-3GalNAcb-Sp14                                                                                                                                 | 43 | 22  | 52  |
| 559 | Galb1-4GlcNAcb1-3Galb1-4GlcNAcb1-6(Galb1-4GlcNAcb1-3Galb1-4GlcNAcb1-2)Mana1-6(Galb1-4GlcNAcb1-3Galb1-4GlcNAcb1-2Mana1-3)Manb1-4GlcNAcb1-4GlcNAcb-Sp24                   | 43 | 22  | 52  |
| 398 | Galb1-4GlcNAcb1-2Mana1-6(GlcNAcb1-2Mana1-3)Manb1-4GlcNAcb1-4GlcNAcb-Sp12                                                                                                | 42 | 25  | 59  |
| 54  | Galb1-4GlcNAcb1-2Mana1-6(Galb1-4GlcNAcb1-2Mana1-3)Manb1-4GlcNAcb1-4GlcNAcb-Sp12                                                                                         | 42 | 22  | 53  |
| 102 | Gala1-3(Fuca1-2)Galb1-3GlcNAcb-Sp8                                                                                                                                      | 42 | 23  | 54  |
| 324 | Galb1-3GlcNAcb1-2Mana1-6(Galb1-3GlcNAcb1-2Mana1-3)Manb1-4GlcNAcb1-4GlcNAcb-Sp19                                                                                         | 42 | 28  | 68  |
| 424 | GalNAca1-3(Fuca1-2)Galb1-3GlcNAcb1-3GalNAcb-Sp14                                                                                                                        | 41 | 9   | 21  |
| 399 | Neu5Aca2-3Galb1-3GlcNAcb1-3GalNAca-Sp14                                                                                                                                 | 40 | 23  | 57  |
| 242 | Neu5Aca2-3Galb1-3(6S)GalNAca-Sp8                                                                                                                                        | 40 | 13  | 32  |
| 563 | GalNAcb1-4GlcNAcb1-3GalNAcb1-4GlcNAcb-Sp0                                                                                                                               | 40 | 18  | 45  |
| 275 | Neu5Aca2-8Neu5Aca-Sp8                                                                                                                                                   | 40 | 15  | 39  |
| 93  | GalNAca1-4(Fuca1-2)Galb1-4GlcNAcb-Sp8                                                                                                                                   | 39 | 20  | 50  |
| 147 | Galb1-3GlcNAcb1-3Galb1-4GlcNAcb-Sp0                                                                                                                                     | 39 | 24  | 61  |
| 86  | GalNAca1-3(Fuca1-2)Galb1-4GlcNAcb-Sp8                                                                                                                                   | 39 | 15  | 39  |
| 125 | Galb1-2Galb-Sp8                                                                                                                                                         | 39 | 18  | 46  |
| 423 | Gala1-3(Fuca1-2)Galb1-3GlcNAcb1-3GalNAcb-Sp14                                                                                                                           | 38 | 26  | 68  |
| 369 | Galb1-4GlcNAcb1-2Mana1-6(Galb1-4GlcNAcb1-4(Galb1-4GlcNAcb1-2)Mana1-3)Manb1-4GlcNAcb1-4GlcNAcb-Sp21                                                                      | 38 | 16  | 43  |
| 30  | (3S)Galb1-3GlcNAcb-Sp0                                                                                                                                                  | 38 | 15  | 41  |
| 118 | Gala1-3Galb-Sp8                                                                                                                                                         | 37 | 29  | 79  |
| 85  | GalNAca1-3(Fuca1-2)Galb1-4GlcNAcb-Sp0                                                                                                                                   | 37 | 24  | 64  |
| 2   | Gica-Sp8                                                                                                                                                                | 36 | 13  | 35  |
| 320 | GlcNAcb1-2Mana1-6(Neu5Aca2-6Galb1-4GlcNAcb1-2Mana1-3)Manb1-4GlcNAcb1-4GlcNAcb-Sp12                                                                                      | 36 | 32  | 89  |
| 269 | Neu5Aca2-6Galb1-4GlcNAcb-Sp8                                                                                                                                            | 35 | 18  | 51  |
| 299 | Neu5Aca2-3Galb1-4(Fuca1-3)GlcNAcb1-6(Galb1-3)GalNAca-Sp14                                                                                                               | 34 | 26  | 76  |
| 297 | (6S)Galb1-4(6S)GlcNAcb-Sp0                                                                                                                                              | 34 | 30  | 89  |
| 28  | (3S)Galb1-3(Fuca1-4)GlcNAcb-Sp8                                                                                                                                         | 34 | 28  | 83  |
| 231 | GalNAcb1-4(Neu5Aca2-3)Galb1-4GlcNAcb-Sp0                                                                                                                                | 34 | 19  | 57  |
| 395 | Gala1-3Galb1-3(Fuca1-4)GlcNAcb1-2Mana1-6(Gala1-3Galb1-3(Fuca1-4)GlcNAcb1-2Mana1-3)Manb1-4GlcNAcb1-4GlcNAcb-Sp19                                                         | 33 | 17  | 50  |
| 251 | Neu5Aca2-3Galb1-4(6S)GlcNAcb-Sp8                                                                                                                                        | 33 | 5   | 17  |
| 260 | Neu5Aca2-3Galb1-4GlcNAcb-Sp8                                                                                                                                            | 33 | 7   | 22  |



|     |                                                                                                                                                                                                                                                 |    |    |     |
|-----|-------------------------------------------------------------------------------------------------------------------------------------------------------------------------------------------------------------------------------------------------|----|----|-----|
| 346 | Mana1-6(Neu5Aca2-6Galb1-4GlcNAcb1-2Mana1-3)Manb1-4GlcNAcb1-4GlcNAc-Sp12                                                                                                                                                                         | 22 | 6  | 30  |
| 316 | Mana1-2Mana1-6(Mana1-2Mana1-3)Mana1-6(Mana1-2Mana1-2Mana1-3)Mana-Sp9                                                                                                                                                                            | 22 | 9  | 43  |
| 396 | Neu5Aca2-3Galb1-3GlcNAcb1-2Mana1-6(Neu5Aca2-3Galb1-3GlcNAcb1-2Mana1-3)Manb1-4GlcNAcb1-4GlcNAc-Sp19                                                                                                                                              | 21 | 7  | 31  |
| 255 | Neu5Aca2-3Galb1-4(Fuca1-3)GlcNAcb-Sp8                                                                                                                                                                                                           | 21 | 29 | 135 |
| 42  | (6S)Galb1-4Glc-Sp0                                                                                                                                                                                                                              | 21 | 8  | 39  |
| 360 | Fuca1-2Galb1-3GlcNAcb1-2Mana1-6(Fuca1-2Galb1-3GlcNAcb1-2Mana1-3)Manb1-4GlcNAcb1-4GlcNAc-Sp20                                                                                                                                                    | 21 | 18 | 83  |
| 78  | Fuca1-2Galb-Sp8                                                                                                                                                                                                                                 | 21 | 11 | 51  |
| 8   | Rhaa-Sp8                                                                                                                                                                                                                                        | 21 | 22 | 103 |
| 475 | GlcNAcb1-6(GlcNAcb1-2)Mana1-6(GlcNAcb1-2Mana1-3)Manb1-4GlcNAcb1-4(Fuca1-6)GlcNAcb-Sp24                                                                                                                                                          | 21 | 10 | 50  |
| 146 | Galb1-3Galb-Sp8                                                                                                                                                                                                                                 | 21 | 15 | 70  |
| 155 | Galb1-4(6S)Glc-Sp0                                                                                                                                                                                                                              | 21 | 14 | 67  |
| 119 | Gala1-4(Fuca1-2)Galb1-4GlcNAcb-Sp8                                                                                                                                                                                                              | 21 | 4  | 19  |
| 221 | Fuca1-2Galb1-4(6S)GlcNAcb-Sp8                                                                                                                                                                                                                   | 21 | 24 | 115 |
| 413 | Gala1-3(Fuca1-2)Galb1-4GlcNAcb1-3GalNAca-Sp14                                                                                                                                                                                                   | 21 | 9  | 44  |
| 522 | Gala1-3(Fuca1-2)Galb1-4GlcNAcb1-2Mana-Sp0                                                                                                                                                                                                       | 21 | 6  | 29  |
| 198 | Glc-Sp8                                                                                                                                                                                                                                         | 20 | 8  | 38  |
| 484 | Mana1-6(Mana1-3)Manb1-4GlcNAcb1-4(Fuca1-6)GlcNAcb-Sp19                                                                                                                                                                                          | 20 | 5  | 24  |
| 560 | Gala1-3Galb1-4GlcNAcb1-2Mana1-6(Gala1-3Galb1-4GlcNAcb1-2Mana1-3)Manb1-4GlcNAcb1-4GlcNAc-Sp24                                                                                                                                                    | 20 | 8  | 39  |
| 149 | Galb1-3GlcNAcb-Sp0                                                                                                                                                                                                                              | 20 | 6  | 28  |
| 477 | Neu5Aca2-6Galb1-4GlcNAcb1-6(Galb1-3GlcNAcb1-3)Galb1-4Glc-Sp21                                                                                                                                                                                   | 20 | 22 | 110 |
| 496 | Galb1-4(Fuca1-3)GlcNAcb1-2Mana-Sp0                                                                                                                                                                                                              | 20 | 15 | 77  |
| 501 | Fuca1-2(6S)Galb1-3(6S)GlcNAcb-Sp0                                                                                                                                                                                                               | 20 | 7  | 34  |
| 583 | GlcNAcb1-3Galb1-4GlcNAcb1-3Galb1-4GlcNAcb1-6(GlcNAcb1-3Galb1-4GlcNAcb1-3Galb1-4GlcNAcb1-2)Mana1-6(GlcNAcb1-3Galb1-4GlcNAcb1-3Galb1-4GlcNAcb1-2Mana1-3)Manb1-4GlcNAcb1-4(Fuca1-6)GlcNAcb-Sp24                                                    | 19 | 8  | 44  |
| 585 | GlcNAcb1-3Galb1-4GlcNAcb1-3Galb1-4GlcNAcb1-3Galb1-4GlcNAcb1-6(GlcNAcb1-3Galb1-4GlcNAcb1-3Galb1-4GlcNAcb1-3Galb1-4GlcNAcb1-2)Mana1-6(GlcNAcb1-3Galb1-4GlcNAcb1-3Galb1-4GlcNAcb1-3Galb1-4GlcNAcb1-2Mana1-3)Manb1-4GlcNAcb1-4(Fuca1-6)GlcNAcb-Sp24 | 19 | 8  | 40  |
| 109 | Gala1-4(Gala1-3)Galb1-4GlcNAcb-Sp8                                                                                                                                                                                                              | 19 | 12 | 65  |
| 601 | Neu5Aca2-6Galb1-4GlcNAcb1-3Galb1-4GlcNAcb1-6(Galb1-3)GalNAca-Sp14                                                                                                                                                                               | 19 | 13 | 67  |
| 455 | Gala1-3(Fuca1-2)Galb1-3GlcNAcb1-2Mana1-6(Gala1-3(Fuca1-2)Galb1-3GlcNAcb1-2Mana1-3)Manb1-4GlcNAcb1-4(Fuca1-6)GlcNAcb-Sp22                                                                                                                        | 19 | 15 | 81  |
| 164 | Galb1-4GlcNAcb1-3Galb1-4Glc-Sp0                                                                                                                                                                                                                 | 19 | 12 | 64  |
| 429 | Galb1-4GlcNAcb1-6(Fuca1-2Galb1-3GlcNAcb1-3)Galb1-4Glc-Sp21                                                                                                                                                                                      | 19 | 12 | 63  |
| 90  | GalNAca1-3(Fuca1-2)Galb-Sp18                                                                                                                                                                                                                    | 19 | 9  | 46  |
| 481 | Neu5Aca2-6Galb1-4 GlcNAcb1-6(Neu5Aca2-6Galb1-4GlcNAcb1-3)GalNAca-Sp14                                                                                                                                                                           | 19 | 15 | 82  |
| 351 | Mana1-6(Galb1-4GlcNAcb1-2Mana1-3)Manb1-4GlcNAcb1-4GlcNAcb-Sp12                                                                                                                                                                                  | 19 | 14 | 72  |
| 174 | GlcNAca1-6Galb1-4GlcNAcb-Sp8                                                                                                                                                                                                                    | 18 | 9  | 50  |
| 518 | (6P)Galb1-4GlcNAcb-Sp0                                                                                                                                                                                                                          | 18 | 9  | 49  |
| 545 | GlcNAcb1-3Galb1-4GlcNAcb1-3Galb1-4GlcNAcb1-2Mana1-6(GlcNAcb1-3Galb1-4GlcNAcb1-3Galb1-4GlcNAcb1-2Mana1-3)Manb1-4GlcNAcb1-4GlcNAcb-Sp12                                                                                                           | 18 | 12 | 65  |
| 101 | Gala1-3(Fuca1-2)Galb1-3GlcNAcb-Sp0                                                                                                                                                                                                              | 18 | 6  | 34  |
| 549 | GlcNAcb1-3Galb1-4GlcNAcb1-3Galb1-4GlcNAcb1-3Galb1-4GlcNAcb1-2Mana1-6(GlcNAcb1-3Galb1-4GlcNAcb1-3Galb1-4GlcNAcb1-3Galb1-4GlcNAcb1-2Mana1-3)Manb1-4GlcNAcb1-4GlcNAcb-Sp25                                                                         | 18 | 8  | 45  |
| 4   | GalNAca-Sp8                                                                                                                                                                                                                                     | 18 | 15 | 82  |
| 98  | GalNAcb1-4GlcNAcb-Sp0                                                                                                                                                                                                                           | 18 | 12 | 67  |
| 153 | Galb1-4(Fuca1-3)GlcNAcb1-3Galb1-4(Fuca1-3)GlcNAcb-Sp0                                                                                                                                                                                           | 18 | 15 | 84  |
| 282 | Neu5Gca2-3Galb1-4(Fuca1-3)GlcNAcb-Sp0                                                                                                                                                                                                           | 18 | 9  | 53  |
| 602 | Neu5Aca2-6Galb1-4GlcNAcb1-6(Galb1-3)GalNAca-Sp14                                                                                                                                                                                                | 18 | 8  | 45  |
| 27  | (3S)Galb1-4(6S)Glc-Sp8                                                                                                                                                                                                                          | 18 | 5  | 30  |
| 240 | Neu5Aca2-3Galb1-3(Fuca1-4)GlcNAcb1-3Galb1-4(Fuca1-3)GlcNAcb-Sp0                                                                                                                                                                                 | 18 | 11 | 63  |
| 208 | Mana1-2Mana1-6(Mana1-2Mana1-3)Mana-Sp9                                                                                                                                                                                                          | 17 | 11 | 63  |
| 478 | Neu5Aca2-3Galb1-4GlcNAcb1-2Mana-Sp0                                                                                                                                                                                                             | 17 | 3  | 19  |
| 7   | Fuca-Sp9                                                                                                                                                                                                                                        | 17 | 11 | 61  |
| 497 | Fuca1-2(6S)Galb1-3GlcNAcb-Sp0                                                                                                                                                                                                                   | 17 | 22 | 130 |
| 370 | GalNAca1-3(Fuca1-2)Galb1-4GlcNAcb1-2Mana1-6(GalNAca1-3(Fuca1-2)Galb1-4GlcNAcb1-2Mana1-3)Manb1-4GlcNAcb1-4GlcNAcb-Sp20                                                                                                                           | 17 | 4  | 25  |
| 122 | Gala1-4Galb1-4Glc-Sp0                                                                                                                                                                                                                           | 17 | 9  | 53  |
| 165 | Galb1-4GlcNAcb1-3Galb1-4Glc-Sp8                                                                                                                                                                                                                 | 17 | 16 | 91  |
| 89  | GalNAca1-3(Fuca1-2)Galb-Sp8                                                                                                                                                                                                                     | 17 | 3  | 19  |
| 60  | Fuca1-2Galb1-3(Fuca1-4)GlcNAcb-Sp8                                                                                                                                                                                                              | 17 | 8  | 46  |
| 605 | Neu5Aca2-6Galb1-4GlcNAcb1-3Galb1-4GlcNAcb1-6(Neu5Aca2-6Galb1-4GlcNAcb1-3Galb1-4GlcNAcb1-3)GalNAca-Sp14                                                                                                                                          | 17 | 16 | 96  |
| 352 | GlcNAcb1-2Mana1-6(GlcNAcb1-2Mana1-3)Manb1-4GlcNAcb1-4(Fuca1-6)GlcNAcb-Sp22                                                                                                                                                                      | 17 | 6  | 33  |
| 467 | Gala1-3(Fuca1-2)Galb1-3GalNAca-Sp8                                                                                                                                                                                                              | 17 | 4  | 26  |
| 389 | Fuca1-2Galb1-3GalNAca1-3(Fuca1-2)Galb1-4Glc-Sp0                                                                                                                                                                                                 | 17 | 29 | 172 |
| 392 | GalNAcb1-4(Neu5Aca2-3)Galb1-4GlcNAcb1-3GalNAca-Sp14                                                                                                                                                                                             | 17 | 4  | 26  |
| 464 | Neu5Aca2-6Galb1-4GlcNAcb1-4Mana1-6(GlcNAcb1-4)(Neu5Aca2-6Galb1-4GlcNAcb1-4)(Neu5Aca2-6Galb1-4GlcNAcb1-2)Mana1-3)Manb1-4GlcNAcb1-4GlcNAcb-Sp21                                                                                                   | 17 | 14 | 84  |
| 121 | Gala1-4Galb1-4GlcNAcb-Sp8                                                                                                                                                                                                                       | 17 | 10 | 60  |
| 547 | Galb1-4GlcNAcb1-3Galb1-4GlcNAcb1-3Galb1-4GlcNAcb1-2Mana1-6(Galb1-4GlcNAcb1-3Galb1-4GlcNAcb1-3Galb1-4GlcNAcb1-2Mana1-3)Manb1-4GlcNAcb1-4GlcNAcb-Sp12                                                                                             | 17 | 8  | 48  |
| 99  | GalNAcb1-4GlcNAcb-Sp8                                                                                                                                                                                                                           | 16 | 5  | 29  |
| 110 | Gala1-3GalNAca-Sp8                                                                                                                                                                                                                              | 16 | 4  | 22  |
| 494 | Fuca1-2Galb1-4GlcNAcb1-6GalNAca-Sp14                                                                                                                                                                                                            | 16 | 5  | 34  |
| 535 | GlcNAcb1-3Galb1-4GlcNAcb1-6(GlcNAcb1-3)Galb1-4GlcNAc-Sp0                                                                                                                                                                                        | 16 | 12 | 75  |
| 554 | Neu5Gca2-8Neu5Aca2-3Galb1-4GlcNAc-Sp0                                                                                                                                                                                                           | 16 | 9  | 53  |
| 272 | Neu5Aca2-6Galb1-4Glc-Sp0                                                                                                                                                                                                                        | 16 | 10 | 62  |

|     |                                                                                                                                                                                                                                                           |    |    |     |
|-----|-----------------------------------------------------------------------------------------------------------------------------------------------------------------------------------------------------------------------------------------------------------|----|----|-----|
| 391 | Galb1-3GlcNAcb1-3GalNAca-Sp14                                                                                                                                                                                                                             | 16 | 8  | 49  |
| 62  | Fuca1-2Galb1-3GalNAca-Sp14                                                                                                                                                                                                                                | 16 | 7  | 45  |
| 521 | Gala1-3Galb1-4GlcNAcb1-2Mana-Sp0                                                                                                                                                                                                                          | 16 | 4  | 25  |
| 353 | Galb1-4GlcNAcb1-2Mana1-6(Galb1-4GlcNAcb1-2Mana1-3)Manb1-4GlcNAcb1-4(Fuca1-6)GlcNAcb-Sp22                                                                                                                                                                  | 16 | 10 | 61  |
| 524 | Galb1-3GlcNAcb1-2Mana-Sp0                                                                                                                                                                                                                                 | 16 | 3  | 20  |
| 568 | Galb1-4GlcNAcb1-3Galb1-4GlcNAcb1-3Galb1-4GlcNAcb1-3Galb1-4GlcNAcb1-3Galb1-4GlcNAcb1-3Galb1-4GlcNAcb1-2Mana1-6(Galb1-4GlcNAcb1-3Galb1-4GlcNAcb1-3Galb1-4GlcNAcb1-3Galb1-4GlcNAcb1-3Galb1-4GlcNAcb1-3Galb1-4GlcNAcb1-2Mana1-3)Manb1-4GlcNAcb1-4GlcNAcb-Sp25 | 16 | 14 | 89  |
| 219 | (3S)Galb1-4(Fuca1-3)(6S)GlcNAcb-Sp8                                                                                                                                                                                                                       | 16 | 10 | 65  |
| 186 | GlcNAcb1-4-MDPLys                                                                                                                                                                                                                                         | 16 | 12 | 79  |
| 507 | GlcNAcb1-6(GlcNAcb1-2)Mana1-6(GlcNAcb1-4)(GlcNAcb1-4)(GlcNAcb1-2)Mana1-3)Manb1-4GlcNAcb1-4(Fuca1-6)GlcNAcb-Sp21                                                                                                                                           | 16 | 13 | 83  |
| 88  | GlcNAcb1-3Galb1-3GalNAca-Sp8                                                                                                                                                                                                                              | 16 | 12 | 75  |
| 248 | Fuca1-2(6S)Galb1-4Glc-Sp0                                                                                                                                                                                                                                 | 15 | 12 | 78  |
| 126 | Galb1-3(Fuca1-4)GlcNAcb1-3Galb1-4(Fuca1-3)GlcNAcb-Sp0                                                                                                                                                                                                     | 15 | 12 | 80  |
| 372 | Gala1-3Galb1-4(Fuca1-3)GlcNAcb1-2Mana1-6(Gala1-3Galb1-4(Fuca1-3)GlcNAcb1-2Mana1-3)Manb1-4GlcNAcb1-4GlcNAcb-Sp20                                                                                                                                           | 15 | 9  | 58  |
| 18  | GlcN(Gc)b-Sp8                                                                                                                                                                                                                                             | 15 | 10 | 66  |
| 574 | GlcNAcb1-3Galb1-4GlcNAcb1-2Mana1-6(GlcNAcb1-3Galb1-4GlcNAcb1-2Mana1-3)Manb1-4GlcNAcb1-4(Fuca1-6)GlcNAcb-Sp24                                                                                                                                              | 15 | 2  | 11  |
| 607 | Neu5Aca2-3Galb1-4GlcNAcb1-3Galb1-4GlcNAcb1-3Galb1-4GlcNAcb1-2Mana1-6(Neu5Aca2-3Galb1-4GlcNAcb1-3Galb1-4GlcNAcb1-3Galb1-4GlcNAcb1-2Mana1-3)Manb1-4GlcNAcb1-4GlcNAcb-Sp12                                                                                   | 15 | 6  | 41  |
| 179 | GlcNAcb1-3GalNAca-Sp8                                                                                                                                                                                                                                     | 15 | 11 | 71  |
| 600 | Neu5Aca2-3Galb1-4GlcNAcb1-3Galb1-4GlcNAcb1-6(Galb1-3)GalNAca-Sp14                                                                                                                                                                                         | 15 | 7  | 47  |
| 55  | Neu5Aca2-6Galb1-4GlcNAcb1-2Mana1-6(Neu5Aca2-6Galb1-4GlcNAcb1-2Mana1-3)Manb1-4GlcNAcb1-4GlcNAcb-Sp12                                                                                                                                                       | 15 | 7  | 46  |
| 199 | Glc1-6Glc-Sp8                                                                                                                                                                                                                                             | 15 | 5  | 34  |
| 290 | Galb1-4(Fuca1-3)(6S)GlcNAcb-Sp0                                                                                                                                                                                                                           | 15 | 5  | 34  |
| 148 | Galb1-3GlcNAcb1-3Galb1-4Glc-Sp10                                                                                                                                                                                                                          | 15 | 9  | 62  |
| 504 | (3S)GalNAcb1-4(Fuca1-3)GlcNAcb-Sp8                                                                                                                                                                                                                        | 15 | 18 | 125 |
| 514 | GalNAcb1-4(6S)GlcNAcb-Sp8                                                                                                                                                                                                                                 | 14 | 11 | 76  |
| 70  | Fuca1-2Galb1-4(Fuca1-3)GlcNAcb1-3Galb1-4(Fuca1-3)GlcNAcb1-3Galb1-4(Fuca1-3)GlcNAcb-Sp0                                                                                                                                                                    | 14 | 8  | 54  |
| 34  | (3S)Galb1-4(6S)GlcNAcb-Sp0                                                                                                                                                                                                                                | 14 | 4  | 28  |
| 37  | (3S)Galb1-4GlcNAcb-Sp8                                                                                                                                                                                                                                    | 14 | 8  | 53  |
| 350 | Galb1-4GlcNAcb1-2Mana1-6Manb1-4GlcNAcb1-4GlcNAcb-Sp12                                                                                                                                                                                                     | 14 | 3  | 21  |
| 416 | Fuca1-2Galb1-4(Fuca1-3)GlcNAcb1-3GalNAca-Sp14                                                                                                                                                                                                             | 14 | 15 | 103 |
| 589 | Galb1-4GlcNAcb1-3Galb1-4GlcNAcb1-3GalNAca-Sp14                                                                                                                                                                                                            | 14 | 17 | 119 |
| 431 | GlcNAcb1-2Mana1-6(GlcNAcb1-4)(GlcNAcb1-2Mana1-3)Manb1-4GlcNAcb1-4GlcNAcb-Sp21                                                                                                                                                                             | 14 | 9  | 63  |
| 368 | Galb1-4(Fuca1-3)GlcNAcb1-6(Fuca1-2Galb1-4GlcNAcb1-3)Galb1-4Glc-Sp21                                                                                                                                                                                       | 14 | 9  | 64  |
| 206 | KDNa2-3Galb1-4GlcNAcb-Sp0                                                                                                                                                                                                                                 | 14 | 5  | 34  |
| 564 | GlcNAcb1-3Galb1-4GlcNAcb1-3Galb1-4GlcNAcb1-3Galb1-4GlcNAcb1-3Galb1-4GlcNAcb1-2Mana1-6(GlcNAcb1-3Galb1-4GlcNAcb1-3Galb1-4GlcNAcb1-3Galb1-4GlcNAcb1-3Galb1-4GlcNAcb1-2Mana1-3)Manb1-4GlcNAcb1-4GlcNAcb-Sp25                                                 | 14 | 3  | 25  |
| 129 | Galb1-3(Fuca1-4)GlcNAcb-Sp8                                                                                                                                                                                                                               | 14 | 15 | 104 |
| 177 | GlcNAcb1-6(GlcNAcb1-3)GalNAca-Sp14                                                                                                                                                                                                                        | 14 | 8  | 54  |
| 29  | (3S)Galb1-3GalNAca-Sp8                                                                                                                                                                                                                                    | 14 | 8  | 56  |
| 61  | Fuca1-2Galb1-3GalNAca-Sp8                                                                                                                                                                                                                                 | 14 | 6  | 46  |
| 224 | Neu5Aca2-3Galb1-3GalNAca-Sp14                                                                                                                                                                                                                             | 14 | 10 | 69  |
| 95  | GalNAcb1-3(Fuca1-2)Galb-Sp8                                                                                                                                                                                                                               | 14 | 2  | 16  |
| 473 | Fuca1-2Galb1-3(Fuca1-4)GlcNAcb1-2Mana1-6(Fuca1-2Galb1-3(Fuca1-4)GlcNAcb1-2Mana1-3)Manb1-4GlcNAcb1-4(Fuca1-6)GlcNAcb1-4(Fuca1-6)GlcNAcb-Sp19                                                                                                               | 14 | 11 | 79  |
| 151 | Galb1-4(Fuca1-3)GlcNAcb-Sp0                                                                                                                                                                                                                               | 14 | 5  | 36  |
| 52  | GlcNAcb1-2Mana1-6(GlcNAcb1-2Mana1-3)Manb1-4GlcNAcb1-4GlcNAcb-Sp12                                                                                                                                                                                         | 13 | 9  | 67  |
| 534 | Neu5Aca2-3Galb1-4(Fuca1-3)GlcNAcb1-2Mana-Sp0                                                                                                                                                                                                              | 13 | 5  | 38  |
| 394 | Gala1-3Galb1-3GlcNAcb1-2Mana1-6(Gala1-3Galb1-3GlcNAcb1-2Mana1-3)Manb1-4GlcNAcb1-4GlcNAcb-Sp19                                                                                                                                                             | 13 | 17 | 126 |
| 203 | GlcAb1-3Galb-Sp8                                                                                                                                                                                                                                          | 13 | 8  | 63  |
| 404 | Gala1-4Galb1-4GlcNAcb1-2Mana1-6(Gala1-4Galb1-4GlcNAcb1-2Mana1-3)Manb1-4GlcNAcb1-4GlcNAcb-Sp24                                                                                                                                                             | 13 | 10 | 76  |
| 330 | Neu5Aca2-6Galb1-4GlcNAcb1-3Galb1-3GlcNAcb-Sp0                                                                                                                                                                                                             | 13 | 14 | 103 |
| 53  | GlcNAcb1-2Mana1-6(GlcNAcb1-2Mana1-3)Manb1-4GlcNAcb1-4GlcNAcb-Sp13                                                                                                                                                                                         | 13 | 2  | 15  |
| 570 | (3S)GlcAb1-3Galb1-4GlcNAcb1-2Mana-Sp0                                                                                                                                                                                                                     | 13 | 11 | 80  |
| 87  | GalNAca1-3(Fuca1-2)Galb1-4Glc-Sp0                                                                                                                                                                                                                         | 13 | 1  | 6   |
| 68  | Fuca1-2Galb1-3GlcNAcb-Sp8                                                                                                                                                                                                                                 | 13 | 6  | 43  |
| 291 | Galb1-4(Fuca1-3)(6S)Glc-Sp0                                                                                                                                                                                                                               | 13 | 10 | 79  |
| 97  | GalNAcb1-4(Fuca1-3)GlcNAcb-Sp0                                                                                                                                                                                                                            | 13 | 9  | 65  |
| 339 | GlcNAca1-4Galb1-4GlcNAcb-Sp0                                                                                                                                                                                                                              | 13 | 9  | 70  |
| 567 | Galb1-3GlcNAcb1-6(Galb1-3)GalNAcb-Sp14                                                                                                                                                                                                                    | 13 | 4  | 29  |
| 384 | Galb1-4GlcNAcb1-6(Fuca1-4(Fuca1-2Galb1-3)GlcNAcb1-3)Galb1-4Glc-Sp21                                                                                                                                                                                       | 13 | 11 | 87  |
| 329 | Neu5,9Ac2a2-3Galb1-3GlcNAcb-Sp0                                                                                                                                                                                                                           | 13 | 13 | 99  |
| 120 | Gala1-4Galb1-4GlcNAcb-Sp0                                                                                                                                                                                                                                 | 13 | 9  | 70  |
| 401 | Galb1-4(Fuca1-3)GlcNAcb1-3GalNAca-Sp14                                                                                                                                                                                                                    | 13 | 4  | 32  |
| 84  | (3S)Galb1-4(Fuca1-3)Glc-Sp0                                                                                                                                                                                                                               | 13 | 7  | 52  |
| 172 | Galb1-4Glc-Sp8                                                                                                                                                                                                                                            | 13 | 10 | 82  |
| 33  | (3S)Galb1-4(Fuca1-3)GlcNAcb-Sp8                                                                                                                                                                                                                           | 13 | 10 | 84  |
| 556 | Neu5Gca2-8Neu5Gca2-6Galb1-4GlcNAcb-Sp0                                                                                                                                                                                                                    | 13 | 5  | 39  |
| 9   | Neu5Aca-Sp8                                                                                                                                                                                                                                               | 12 | 15 | 121 |
| 134 | GlcNAcb1-6(Galb1-3)GalNAca-Sp14                                                                                                                                                                                                                           | 12 | 12 | 99  |
| 410 | Galb1-4GlcNAcb1-6(Neu5Aca2-6Galb1-3GlcNAcb1-3)Galb1-4Glc-Sp21                                                                                                                                                                                             | 12 | 28 | 222 |
| 116 | Gala1-3Galb1-4Glc-Sp0                                                                                                                                                                                                                                     | 12 | 5  | 39  |
| 427 | Gala1-3(Fuca1-2)Galb1-4GlcNAcb1-2Mana1-6(Gala1-3(Fuca1-2)Galb1-4GlcNAcb1-2Mana1-3)Manb1-4GlcNAcb1-4(Fuca1-6)GlcNAcb-Sp22                                                                                                                                  | 12 | 8  | 65  |

|     |                                                                                                                                                                                                                                  |    |    |     |
|-----|----------------------------------------------------------------------------------------------------------------------------------------------------------------------------------------------------------------------------------|----|----|-----|
| 506 | GalNAca1-3(Fuca1-2)Galb1-3GlcNAcb1-6GalNAca-Sp14                                                                                                                                                                                 | 12 | 34 | 270 |
| 212 | Mana1-2Mana1-6(Mana1-2Mana1-3)Mana1-6(Mana1-2Mana1-2Mana1-3)Manb1-4GlcNAcb1-4GlcNAcb-Sp12                                                                                                                                        | 12 | 13 | 101 |
| 173 | GlcNAca1-3Galb1-4GlcNAcb-Sp8                                                                                                                                                                                                     | 12 | 7  | 58  |
| 180 | GlcNAcb1-3GalNAca-Sp14                                                                                                                                                                                                           | 12 | 14 | 117 |
| 428 | Galb1-3GlcNAcb1-6(Galb1-3GlcNAcb1-2)Mana1-6(Galb1-3GlcNAcb1-2Mana1-3)Manb1-4GlcNAcb1-4GlcNAcb-Sp19                                                                                                                               | 12 | 5  | 38  |
| 511 | (6S)(4S)GalNAcb1-4GlcNAcb-Sp8                                                                                                                                                                                                    | 12 | 7  | 53  |
| 582 | Galb1-4GlcNAcb1-3Galb1-4GlcNAcb1-6(Galb1-4GlcNAcb1-3Galb1-4GlcNAcb1-2)Mana1-6(Galb1-4GlcNAcb1-3Galb1-4GlcNAcb1-2Mana1-3)Manb1-4GlcNAcb1-4(Fuca1-6)GlcNAcb-Sp24                                                                   | 12 | 12 | 101 |
| 343 | GlcNAca1-4Galb1-4GlcNAcb1-3Galb1-4GlcNAcb-Sp0                                                                                                                                                                                    | 12 | 21 | 170 |
| 71  | Fuca1-2Galb1-4(Fuca1-3)GlcNAcb-Sp0                                                                                                                                                                                               | 12 | 11 | 94  |
| 417 | Gala1-3(Fuca1-2)Galb1-4(Fuca1-3)GlcNAcb1-3GalNAca-Sp14                                                                                                                                                                           | 12 | 5  | 44  |
| 610 | Galb1-3GalNAcb1-4(Neu5Aca2-8Neu5Aca2-8Neu5Aca2-3)Galb1-4Glc-Sp21                                                                                                                                                                 | 12 | 6  | 49  |
| 150 | Galb1-3GlcNAcb-Sp8                                                                                                                                                                                                               | 12 | 9  | 73  |
| 39  | (6S)(4S)Galb1-4GlcNAcb-Sp0                                                                                                                                                                                                       | 12 | 5  | 40  |
| 38  | (3S)Galb-Sp8                                                                                                                                                                                                                     | 12 | 9  | 72  |
| 137 | Neu5Acb2-6(Galb1-3)GalNAca-Sp8                                                                                                                                                                                                   | 12 | 9  | 79  |
| 210 | Mana1-6(Mana1-2Mana1-3)Mana1-6(Mana1-2Mana1-3)Manb1-4GlcNAcb1-4GlcNAcb-Sp12                                                                                                                                                      | 12 | 6  | 52  |
| 218 | Neu5Aca2-3Galb1-4GlcNAcb1-3Galb1-4(Fuca1-3)GlcNAcb-Sp0                                                                                                                                                                           | 12 | 7  | 60  |
| 488 | Galb1-3GlcNAcb1-6GalNAca-Sp14                                                                                                                                                                                                    | 11 | 5  | 41  |
| 100 | Gala1-2Galb-Sp8                                                                                                                                                                                                                  | 11 | 8  | 70  |
| 447 | Galb1-4(Fuca1-3)GlcNAcb1-6GalNAca-Sp14                                                                                                                                                                                           | 11 | 15 | 134 |
| 215 | Mana1-6(Mana1-3)Mana1-6(Mana1-2Mana1-3)Manb1-4GlcNAcb1-4GlcNAcb-Sp12                                                                                                                                                             | 11 | 7  | 62  |
| 284 | Neu5Gca2-3Galb1-4Glc-Sp0                                                                                                                                                                                                         | 11 | 8  | 74  |
| 96  | GalNAcb1-3Gala1-4Galb1-4GlcNAcb-Sp0                                                                                                                                                                                              | 11 | 7  | 60  |
| 486 | Neu5Aca2-3Galb1-3GlcNAcb1-2Mana1-6(GlcNAcb1-4)(Neu5Aca2-3Galb1-3GlcNAcb1-2Mana1-3)Manb1-4GlcNAcb1-4GlcNAcb-Sp21                                                                                                                  | 11 | 6  | 57  |
| 314 | Mana1-6(Mana1-3)Mana1-6(Mana1-3)Manb-Sp10                                                                                                                                                                                        | 11 | 7  | 61  |
| 115 | Gala1-3Galb1-4GlcNAcb-Sp8                                                                                                                                                                                                        | 11 | 6  | 59  |
| 371 | Gala1-3(Fuca1-2)Galb1-4GlcNAcb1-2Mana1-6(Gala1-3(Fuca1-2)Galb1-4GlcNAcb1-2Mana1-3)Manb1-4GlcNAcb1-4GlcNAcb-Sp20                                                                                                                  | 11 | 7  | 60  |
| 209 | Mana1-2Mana1-3Mana-Sp9                                                                                                                                                                                                           | 11 | 8  | 70  |
| 189 | GlcNAcb1-4GlcNAcb1-4GlcNAcb1-4GlcNAcb1-4GlcNAcb1-4GlcNAcb1-Sp8                                                                                                                                                                   | 11 | 12 | 110 |
| 374 | Gala1-3(Fuca1-2)Galb1-3GlcNAcb1-2Mana1-6(Gala1-3(Fuca1-2)Galb1-3GlcNAcb1-2Mana1-3)Manb1-4GlcNAcb1-4GlcNAcb-Sp20                                                                                                                  | 11 | 12 | 107 |
| 469 | Glca1-6Glca1-6Glca1-6Glc-Sp10                                                                                                                                                                                                    | 11 | 3  | 25  |
| 63  | Fuca1-2Galb1-3GalNAcb1-4(Neu5Aca2-3)Galb1-4Glc-Sp0                                                                                                                                                                               | 11 | 7  | 69  |
| 292 | Galb1-4(Fuca1-3)GlcNAcb1-3Galb1-3(Fuca1-4)GlcNAcb-Sp0                                                                                                                                                                            | 11 | 10 | 95  |
| 566 | GlcNAcb1-3Galb1-3GalNAca-Sp14                                                                                                                                                                                                    | 11 | 8  | 72  |
| 466 | Neu5Aca2-6Galb1-4GlcNAcb1-6(Neu5Aca2-6Galb1-4GlcNAcb1-2)Mana1-6(GlcNAcb1-4)(Neu5Aca2-6Galb1-4GlcNAcb1-4)(Neu5Aca2-6Galb1-4GlcNAcb1-2)Mana1-3)Manb1-4GlcNAcb1-4GlcNAcb-Sp21                                                       | 11 | 6  | 57  |
| 273 | Neu5Aca2-6Galb1-4Glc-Sp8                                                                                                                                                                                                         | 11 | 8  | 73  |
| 581 | Galb1-4GlcNAcb1-3Galb1-4GlcNAcb1-3Galb1-4GlcNAcb1-3Galb1-4GlcNAcb1-3Galb1-4GlcNAcb1-2Mana1-6(Galb1-4GlcNAcb1-3Galb1-4GlcNAcb1-3Galb1-4GlcNAcb1-3Galb1-4GlcNAcb1-3Galb1-4GlcNAcb1-2Mana1-3)Manb1-4GlcNAcb1-4(Fuca1-6)GlcNAcb-Sp19 | 10 | 1  | 12  |
| 421 | GlcNAcb1-2(GlcNAcb1-6)Mana1-6(GlcNAcb1-2Mana1-3)Manb1-4GlcNAcb1-4GlcNAcb-Sp19                                                                                                                                                    | 10 | 5  | 46  |
| 201 | GlcAa-Sp8                                                                                                                                                                                                                        | 10 | 9  | 85  |
| 382 | Galb1-3GlcNAcb1-3Galb1-4GlcNAcb1-6(Galb1-3GlcNAcb1-3)Galb1-4Glc-Sp0                                                                                                                                                              | 10 | 2  | 23  |
| 162 | Galb1-4GlcNAcb1-3Galb1-4GlcNAcb1-3Galb1-4GlcNAcb-Sp0                                                                                                                                                                             | 10 | 6  | 61  |
| 356 | KDNa2-3Galb1-4(Fuca1-3)GlcNAcb-Sp0                                                                                                                                                                                               | 10 | 12 | 121 |
| 190 | GlcNAcb1-4GlcNAcb1-4GlcNAcb1-4GlcNAcb1-4GlcNAcb1-Sp8                                                                                                                                                                             | 10 | 6  | 57  |
| 188 | GlcNAcb1-4Galb1-4GlcNAcb-Sp8                                                                                                                                                                                                     | 10 | 9  | 92  |
| 491 | Neu5Aca2-3Galb1-3GlcNAcb1-6GalNAca-Sp14                                                                                                                                                                                          | 10 | 7  | 68  |
| 397 | GlcNAcb1-2Mana1-6(Galb1-4GlcNAcb1-2Mana1-3)Manb1-4GlcNAcb1-4GlcNAcb-Sp12                                                                                                                                                         | 10 | 3  | 35  |
| 59  | Fuca1-2Galb1-3GalNAcb1-3Gala1-4Galb1-4Glc-Sp9                                                                                                                                                                                    | 10 | 7  | 69  |
| 10  | Neu5Aca-Sp11                                                                                                                                                                                                                     | 10 | 13 | 136 |
| 338 | GlcNAca1-4Galb1-4GlcNAcb1-3Galb1-4GlcNAcb1-3Galb1-4GlcNAcb-Sp0                                                                                                                                                                   | 10 | 8  | 78  |
| 123 | Gala1-4GlcNAcb-Sp8                                                                                                                                                                                                               | 10 | 4  | 37  |
| 367 | Neu5Aca2-6GlcNAcb1-4GlcNAcb1-4GlcNAcb-Sp21                                                                                                                                                                                       | 10 | 8  | 86  |
| 77  | Fuca1-2Galb1-4Glc-Sp0                                                                                                                                                                                                            | 10 | 7  | 68  |
| 144 | Galb1-3GalNAcb1-4(Neu5Aca2-3)Galb1-4Glc-Sp0                                                                                                                                                                                      | 10 | 6  | 59  |
| 499 | Fuca1-2Galb1-4GlcNAcb1-2Mana-Sp0                                                                                                                                                                                                 | 10 | 10 | 104 |
| 194 | GlcNAcb1-6Galb1-4GlcNAcb-Sp8                                                                                                                                                                                                     | 9  | 6  | 63  |
| 202 | GlcAb-Sp8                                                                                                                                                                                                                        | 9  | 1  | 14  |
| 114 | Gala1-3Galb1-3GlcNAcb-Sp0                                                                                                                                                                                                        | 9  | 3  | 37  |
| 171 | Galb1-4Glc-Sp0                                                                                                                                                                                                                   | 9  | 4  | 41  |
| 279 | Neu5Acb2-6Galb1-4GlcNAcb-Sp8                                                                                                                                                                                                     | 9  | 6  | 62  |
| 433 | GlcNAcb1-6(GlcNAcb1-2)Mana1-6(GlcNAcb1-4)(GlcNAcb1-2Mana1-3)Manb1-4GlcNAcb1-4GlcNAcb-Sp21                                                                                                                                        | 9  | 3  | 34  |
| 453 | GalNAcb1-4Galb1-4Glc-Sp0                                                                                                                                                                                                         | 9  | 1  | 15  |
| 393 | GalNAca1-3(Fuca1-2)Galb1-3GalNAca1-3(Fuca1-2)Galb1-4GlcNAcb-Sp0                                                                                                                                                                  | 9  | 15 | 161 |
| 598 | GlcNAcb1-3Galb1-4GlcNAcb1-3Galb1-4GlcNAcb1-3GalNAca-Sp14                                                                                                                                                                         | 9  | 7  | 79  |
| 154 | Galb1-4(Fuca1-3)GlcNAcb1-3Galb1-4(Fuca1-3)GlcNAcb1-3Galb1-4(Fuca1-3)GlcNAcb-Sp0                                                                                                                                                  | 9  | 16 | 178 |
| 41  | (6P)Mana-Sp8                                                                                                                                                                                                                     | 9  | 12 | 131 |
| 402 | GalNAca1-3GalNAcb1-3Gala1-4Galb1-4GlcNAcb-Sp0                                                                                                                                                                                    | 9  | 10 | 107 |
| 470 | Glca1-4Glca1-4Glca1-4Glc-Sp10                                                                                                                                                                                                    | 9  | 12 | 134 |
| 113 | Gala1-3Galb1-4(Fuca1-3)GlcNAcb-Sp8                                                                                                                                                                                               | 9  | 10 | 110 |
| 15  | GalNAcb-Sp8                                                                                                                                                                                                                      | 9  | 8  | 86  |
| 103 | Gala1-3(Fuca1-2)Galb1-4(Fuca1-3)GlcNAcb-Sp0                                                                                                                                                                                      | 9  | 6  | 65  |



|     |                                                                                                                                                                                                                   |   |    |     |
|-----|-------------------------------------------------------------------------------------------------------------------------------------------------------------------------------------------------------------------|---|----|-----|
| 26  | (3S)Galb1-4(6S)GlcB-Sp0                                                                                                                                                                                           | 9 | 10 | 109 |
| 571 | Galb1-3GlcNAcb1-3Galb1-4GlcNAcb1-3Galb1-4GlcNAcb1-6(Galb1-3GlcNAcb1-3Galb1-4GlcNAcb1-3Galb1-4GlcNAcb1-2)Mana1-6(Galb1-3GlcNAcb1-3Galb1-4GlcNAcb1-3Galb1-4GlcNAcb1-2Mana1-3)Manb1-4GlcNAcb1-4(Fuca1-6)GlcNAcb-Sp24 | 9 | 6  | 70  |
| 286 | Neu5Gca2-6Galb1-4GlcNAcb-Sp0                                                                                                                                                                                      | 9 | 14 | 160 |
| 593 | GlcNAcb1-3Galb1-4GlcNAcb1-3GalNAca-Sp14                                                                                                                                                                           | 9 | 7  | 77  |
| 537 | Gala1-3(Fuca1-2)Galb1-3GalNAcb1-3Gala1-4Galb1-4Glc-Sp21                                                                                                                                                           | 9 | 10 | 118 |
| 48  | Neu5,9Ac <sub>2</sub> a-Sp8                                                                                                                                                                                       | 9 | 7  | 85  |
| 357 | KDNa2-6Galb1-4GlcNAc-Sp0                                                                                                                                                                                          | 9 | 4  | 44  |
| 197 | GlcA1-6GlcA1-6GlcB-Sp8                                                                                                                                                                                            | 8 | 9  | 108 |
| 575 | Galb1-4GlcNAcb1-3Galb1-4GlcNAcb1-2Mana1-6(Galb1-4GlcNAcb1-3Galb1-4GlcNAcb1-2Mana1-3)Manb1-4GlcNAcb1-4(Fuca1-6)GlcNAcb-Sp24                                                                                        | 8 | 3  | 35  |
| 503 | GalNAcb1-4(Fuca1-3)(6S)GlcNAcb-Sp8                                                                                                                                                                                | 8 | 9  | 107 |
| 43  | (6S)Galb1-4GlcB-Sp8                                                                                                                                                                                               | 8 | 6  | 71  |
| 80  | Fuca1-4GlcNAcb-Sp8                                                                                                                                                                                                | 8 | 5  | 56  |
| 533 | Fuca1-4(Galb1-3)GlcNAcb1-2 Mana-Sp0                                                                                                                                                                               | 8 | 10 | 127 |
| 50  | Mana1-6(Mana1-3)Manb1-4GlcNAcb1-4GlcNAcb-Sp12                                                                                                                                                                     | 8 | 8  | 99  |
| 480 | Neu5Aca2-6Galb1-4GlcNAcb1-6GalNAca-Sp14                                                                                                                                                                           | 8 | 7  | 80  |
| 458 | Galb1-4GlcNAcb1-6(Galb1-4GlcNAcb1-2)Mana1-6(Galb1-4GlcNAcb1-2Mana1-3)Manb1-4GlcNAcb1-4GlcNAcb-Sp19                                                                                                                | 8 | 3  | 40  |
| 264 | Neu5Aca2-3Galb1-4GlcB-Sp8                                                                                                                                                                                         | 8 | 3  | 35  |
| 236 | Neu5Aca2-3GalNAca-Sp8                                                                                                                                                                                             | 8 | 6  | 78  |
| 449 | Fuca1-2Galb1-4GlcNAcb1-6(Fuca1-2Galb1-4GlcNAcb1-3)GalNAc-Sp14                                                                                                                                                     | 8 | 4  | 54  |
| 513 | (3S)GalNAcb1-4(3S)GlcNAc-Sp8                                                                                                                                                                                      | 8 | 9  | 115 |
| 288 | Neu5Aca2-3Galb1-4GlcNAcb1-6(Galb1-3)GalNAca-Sp14                                                                                                                                                                  | 8 | 5  | 58  |
| 238 | Neu5Aca2-3Galb1-3(6S)GlcNAc-Sp8                                                                                                                                                                                   | 8 | 4  | 49  |
| 246 | Neu5Aca2-3Galb1-3GalNAcb1-3Gala1-4Galb1-4GlcB-Sp0                                                                                                                                                                 | 8 | 9  | 110 |
| 536 | GalNAca1-3(Fuca1-2)Galb1-3GalNAcb1-3Gala1-4Galb1-4Glc-Sp21                                                                                                                                                        | 8 | 7  | 84  |
| 185 | GlcNAcb1-3Galb1-4GlcB-Sp0                                                                                                                                                                                         | 8 | 6  | 69  |
| 204 | GlcAb1-6Galb-Sp8                                                                                                                                                                                                  | 8 | 3  | 34  |
| 239 | Neu5Aca2-3Galb1-3(Fuca1-4)GlcNAcb-Sp8                                                                                                                                                                             | 8 | 6  | 74  |
| 211 | Mana1-2Mana1-6(Mana1-3)Mana1-6(Mana1-2Mana1-2Mana1-3)Manb1-4GlcNAcb1-4GlcNAcb-Sp12                                                                                                                                | 8 | 6  | 73  |
| 94  | GalNAcb1-3GalNAca-Sp8                                                                                                                                                                                             | 8 | 9  | 120 |
| 442 | GalNAcb1-6GalNAcb-Sp8                                                                                                                                                                                             | 8 | 4  | 58  |
| 315 | Mana1-2Mana1-6(Mana1-3)Mana1-6(Mana1-2Mana1-2Mana1-3)Mana-Sp9                                                                                                                                                     | 8 | 4  | 53  |
| 235 | Neu5Aca2-6(Neu5Aca2-3)GalNAca-Sp8                                                                                                                                                                                 | 8 | 3  | 36  |
| 181 | GlcNAcb1-3Galb-Sp8                                                                                                                                                                                                | 8 | 4  | 49  |
| 419 | Galb1-4(Fuca1-3)GlcNAcb1-2Mana1-6(Galb1-4(Fuca1-3)GlcNAcb1-2Mana1-3)Manb1-4GlcNAcb1-4(Fuca1-6)GlcNAcb-Sp22                                                                                                        | 7 | 1  | 17  |
| 525 | Gala1-3(Fuca1-2)Galb1-3GlcNAcb1-6GalNAc-Sp14                                                                                                                                                                      | 7 | 9  | 126 |
| 75  | Fuca1-2Galb1-4GlcNAcb-Sp0                                                                                                                                                                                         | 7 | 15 | 198 |
| 468 | Gala1-3(Fuca1-2)Galb1-3GalNAcb-Sp8                                                                                                                                                                                | 7 | 11 | 154 |
| 551 | Galb1-3GlcNAcb1-3Galb1-4GlcNAcb1-2Mana1-6(Galb1-3GlcNAcb1-3Galb1-4GlcNAcb1-2Mana1-3)Manb1-4GlcNAcb1-4GlcNAcb-Sp25                                                                                                 | 7 | 5  | 63  |
| 340 | GlcNAca1-4Galb1-3GlcNAcb-Sp0                                                                                                                                                                                      | 7 | 3  | 38  |
| 366 | Neu5Aca2-6GlcNAcb1-4GlcNAc-Sp21                                                                                                                                                                                   | 7 | 9  | 127 |
| 414 | GalNAca1-3(Fuca1-2)Galb1-4GlcNAcb1-3GalNAca-Sp14                                                                                                                                                                  | 7 | 11 | 147 |
| 159 | Galb1-4GlcNAcb1-3GalNAca-Sp8                                                                                                                                                                                      | 7 | 6  | 79  |
| 106 | Gala1-3(Fuca1-2)Galb1-4GlcB-Sp0                                                                                                                                                                                   | 7 | 7  | 101 |
| 287 | Neu5Gca-Sp8                                                                                                                                                                                                       | 7 | 5  | 72  |
| 307 | GlcAb1-3GlcNAcb-Sp8                                                                                                                                                                                               | 7 | 11 | 167 |
| 223 | Neu5Aca2-3Galb1-3GalNAca-Sp8                                                                                                                                                                                      | 7 | 8  | 112 |
| 298 | (6P)GlcB-Sp10                                                                                                                                                                                                     | 7 | 7  | 110 |
| 450 | Gala1-3(Fuca1-2)Galb1-4GlcNAcb1-6(Gala1-3(Fuca1-2)Galb1-4GlcNAcb1-3)GalNAc-Sp14                                                                                                                                   | 7 | 8  | 117 |
| 278 | Neu5Acb2-6GalNAca-Sp8                                                                                                                                                                                             | 6 | 3  | 53  |
| 454 | GalNAca1-3(Fuca1-2)Galb1-4GlcNAcb1-2Mana1-6(GalNAca1-3(Fuca1-2)Galb1-4GlcNAcb1-2Mana1-3)Manb1-4GlcNAcb1-4(Fuca1-6)GlcNAcb-Sp22                                                                                    | 6 | 2  | 39  |
| 25  | (3S)Galb1-4GlcB-Sp8                                                                                                                                                                                               | 6 | 4  | 60  |
| 12  | Galb-Sp8                                                                                                                                                                                                          | 6 | 4  | 65  |
| 505 | Fuca1-2Galb1-3GlcNAcb1-6(Fuca1-2Galb1-3GlcNAcb1-3)GalNAca-Sp14                                                                                                                                                    | 6 | 2  | 40  |
| 170 | Galb1-4GlcNAcb-Sp23                                                                                                                                                                                               | 6 | 8  | 128 |
| 520 | Neu5Aca2-6Galb1-4GlcNAcb1-2Man-Sp0                                                                                                                                                                                | 6 | 5  | 81  |
| 452 | Neu5Aca2-8Neu5Aca2-3Galb1-3GalNAcb1-4(Neu5Aca2-8Neu5Aca2-3)Galb1-4GlcB-Sp0                                                                                                                                        | 6 | 8  | 133 |
| 388 | GlcNAcb1-2Mana1-6(GlcNAcb1-4(GlcNAcb1-2)Mana1-3)Manb1-4GlcNAcb1-4GlcNAc-Sp21                                                                                                                                      | 6 | 18 | 316 |
| 167 | Galb1-4GlcNAcb1-6(Galb1-3)GalNAc-Sp14                                                                                                                                                                             | 6 | 1  | 17  |
| 562 | GalNAcb1-3GlcNAcb-Sp0                                                                                                                                                                                             | 6 | 6  | 99  |
| 300 | Galb1-3Galb1-4GlcNAcb-Sp8                                                                                                                                                                                         | 6 | 13 | 222 |
| 193 | GlcNAcb1-6GalNAca-Sp14                                                                                                                                                                                            | 6 | 10 | 175 |
| 538 | Galb1-3GalNAcb1-3Gal-Sp21                                                                                                                                                                                         | 6 | 8  | 138 |
| 17  | GlcNAcb-Sp8                                                                                                                                                                                                       | 6 | 6  | 111 |
| 604 | GlcNAcb1-6(Neu5Aca2-3Galb1-3)GalNAca-Sp14                                                                                                                                                                         | 6 | 7  | 132 |
| 81  | Fucb1-3GlcNAcb-Sp8                                                                                                                                                                                                | 6 | 3  | 46  |
| 576 | GlcNAcb1-3Galb1-4GlcNAcb1-3Galb1-4GlcNAcb1-2Mana1-6(GlcNAcb1-3Galb1-4GlcNAcb1-3Galb1-4GlcNAcb1-2Mana1-3)Manb1-4GlcNAcb1-4(Fuca1-6)GlcNAcb-Sp24                                                                    | 6 | 12 | 224 |
| 528 | GalNAcb1-4GlcNAcb1-2Mana-Sp0                                                                                                                                                                                      | 6 | 5  | 96  |
| 289 | Galb1-3GlcNAcb1-3Galb1-3GlcNAcb-Sp0                                                                                                                                                                               | 6 | 9  | 160 |
| 508 | Galb1-4GlcNAcb1-6(Galb1-4GlcNAcb1-2)Mana1-6(GlcNAcb1-4)Galb1-4GlcNAcb1-4(Galb1-4GlcNAcb1-2)Mana1-3)Manb1-4GlcNAcb1-4(Fuca1-6)GlcNAc-Sp21                                                                          | 6 | 2  | 33  |

|     |                                                                                                                       |   |    |     |
|-----|-----------------------------------------------------------------------------------------------------------------------|---|----|-----|
| 11  | Neu5Acb-Sp8                                                                                                           | 5 | 8  | 140 |
| 425 | Gala1-3Galb1-3GlcNAcb1-3GalNAc-Sp14                                                                                   | 5 | 7  | 119 |
| 390 | Fuca1-2Galb1-3GalNAca1-3(Fuca1-2)Galb1-4GlcNAcb-Sp0                                                                   | 5 | 6  | 107 |
| 65  | Fuca1-2Galb1-3GlcNAcb1-3Galb1-4Glc-Sp8                                                                                | 5 | 4  | 66  |
| 430 | Fuca1-3GlcNAcb1-6(Galb1-4GlcNAcb1-3)Galb1-4Glc-Sp21                                                                   | 5 | 5  | 89  |
| 66  | Fuca1-2Galb1-3GlcNAcb1-3Galb1-4Glc-Sp10                                                                               | 5 | 8  | 157 |
| 168 | Galb1-4GlcNAcb-Sp0                                                                                                    | 5 | 2  | 44  |
| 380 | Galb1-3GalNAca1-3(Fuca1-2)Galb1-4Glc-Sp0                                                                              | 5 | 3  | 52  |
| 111 | Gala1-3GalNAca-Sp16                                                                                                   | 5 | 4  | 81  |
| 498 | Gala1-3(Fuca1-2)Galb1-4GlcNAcb1-6GalNAca-Sp14                                                                         | 5 | 4  | 77  |
| 232 | GalNAcb1-4(Neu5Aca2-3)Galb1-4GlcNAcb-Sp8                                                                              | 5 | 3  | 62  |
| 569 | (3S)GlcAb1-3Galb1-4GlcNAcb1-3Galb1-4Glc-Sp0                                                                           | 5 | 12 | 225 |
| 192 | GlcNAcb1-6GalNAca-Sp8                                                                                                 | 5 | 3  | 59  |
| 561 | GlcNAcb1-3Galb1-4GlcNAcb1-6(GlcNAcb1-3Galb1-3)GalNAca-Sp14                                                            | 5 | 5  | 101 |
| 293 | Galb1-4GlcNAcb1-3Galb1-3GlcNAcb-Sp0                                                                                   | 5 | 6  | 111 |
| 323 | Neu5Gcb2-6Galb1-4GlcNAc-Sp8                                                                                           | 5 | 8  | 169 |
| 22  | 6S(3S)Galb1-4(6S)GlcNAcb-Sp0                                                                                          | 5 | 10 | 207 |
| 58  | Fuca1-2Galb1-3GalNAcb1-3Gala-Sp9                                                                                      | 5 | 5  | 95  |
| 64  | Fuca1-2Galb1-3GalNAcb1-4(Neu5Aca2-3)Galb1-4Glc-Sp9                                                                    | 5 | 3  | 56  |
| 358 | KDNa2-3Galb1-4Glc-Sp0                                                                                                 | 5 | 8  | 157 |
| 363 | Gala1-3Galb1-4GlcNAcb1-2Mana1-6(Gala1-3Galb1-4GlcNAcb1-2Mana1-3)Manb1-4GlcNAcb1-4GlcNAcb-Sp20                         | 5 | 5  | 105 |
| 169 | Galb1-4GlcNAcb-Sp8                                                                                                    | 5 | 10 | 203 |
| 407 | Galb1-3GlcNAca1-6Galb1-4GlcNAcb-Sp0                                                                                   | 4 | 7  | 154 |
| 112 | Gala1-3GalNAcb-Sp8                                                                                                    | 4 | 6  | 134 |
| 334 | GalNAcb1-3Gala1-4Galb1-4GlcNAcb1-3Galb1-4Glc-Sp0                                                                      | 4 | 4  | 102 |
| 160 | Galb1-4GlcNAcb1-3GalNAc-Sp14                                                                                          | 4 | 11 | 248 |
| 107 | Gala1-3(Fuca1-2)Galb-Sp8                                                                                              | 4 | 5  | 119 |
| 217 | Manb1-4GlcNAcb-Sp0                                                                                                    | 4 | 4  | 97  |
| 166 | Galb1-4GlcNAcb1-6(Galb1-3)GalNAca-Sp8                                                                                 | 4 | 12 | 292 |
| 213 | Mana1-6(Mana1-3)Mana-Sp9                                                                                              | 4 | 1  | 23  |
| 409 | Gala1-3(Fuca1-2)Galb1-4(Fuca1-3)Glc-Sp21                                                                              | 4 | 7  | 188 |
| 24  | (3S)Galb1-4(Fuca1-3)(6S)Glc-Sp0                                                                                       | 4 | 7  | 174 |
| 540 | GlcNAcb1-3Galb1-4GlcNAcb1-2Mana1-6(GlcNAcb1-3Galb1-4GlcNAcb1-2Mana1-3)Manb1-4GlcNAcb1-4GlcNAcb-Sp25                   | 4 | 10 | 245 |
| 132 | Galb1-4GlcNAcb1-6GalNAc-Sp14                                                                                          | 4 | 7  | 169 |
| 82  | GalNAca1-3(Fuca1-2)Galb1-3GlcNAcb-Sp0                                                                                 | 4 | 2  | 64  |
| 183 | GlcNAcb1-3Galb1-4GlcNAcb-Sp8                                                                                          | 4 | 9  | 236 |
| 422 | Fuca1-2Galb1-3GlcNAcb1-3GalNAc-Sp14                                                                                   | 4 | 12 | 308 |
| 105 | Gala1-3(Fuca1-2)Galb1-4GlcNAc-Sp0                                                                                     | 4 | 11 | 281 |
| 489 | Gala1-3Galb1-3GlcNAcb1-6GalNAca-Sp14                                                                                  | 4 | 7  | 199 |
| 280 | Neu5Gca2-3Galb1-3(Fuca1-4)GlcNAcb-Sp0                                                                                 | 4 | 6  | 149 |
| 142 | Galb1-3GalNAcb-Sp8                                                                                                    | 4 | 7  | 176 |
| 305 | Galb1-4GlcNAcb1-6Galb1-4GlcNAcb-Sp0                                                                                   | 4 | 8  | 217 |
| 163 | Galb1-4GlcNAcb1-3Galb1-4GlcNAcb-Sp0                                                                                   | 4 | 4  | 111 |
| 355 | (6S)GlcNAcb1-3Galb1-4GlcNAcb-Sp0                                                                                      | 4 | 4  | 103 |
| 176 | GlcNAcb1-6(GlcNAcb1-3)GalNAca-Sp8                                                                                     | 4 | 6  | 155 |
| 515 | (3S)GalNAcb1-4GlcNAc-Sp8                                                                                              | 3 | 6  | 171 |
| 140 | Galb1-3GalNAca-Sp14                                                                                                   | 3 | 10 | 301 |
| 250 | Neu5Aca2-3Galb1-3GlcNAcb-Sp8                                                                                          | 3 | 7  | 226 |
| 45  | (6S)Galb1-4(6S)Glc-Sp8                                                                                                | 3 | 4  | 138 |
| 283 | Neu5Gca2-3Galb1-4GlcNAcb-Sp0                                                                                          | 3 | 1  | 46  |
| 108 | Gala1-3(Fuca1-2)Galb-Sp18                                                                                             | 3 | 13 | 426 |
| 214 | Mana1-2Mana1-2Mana1-6(Mana1-3)Mana-Sp9                                                                                | 3 | 7  | 239 |
| 435 | Galb1-4GlcNAcb1-2Mana1-6(GlcNAcb1-4)(Galb1-4GlcNAcb1-2Mana1-3)Manb1-4GlcNAcb1-4GlcNAc-Sp21                            | 3 | 5  | 172 |
| 451 | GalNAca1-3(Fuca1-2)Galb1-4GlcNAcb1-6(GalNAca1-3(Fuca1-2)Galb1-4GlcNAcb1-3)GalNAc-Sp14                                 | 3 | 6  | 192 |
| 492 | (3S)Galb1-3(Fuca1-4)GlcNAcb-Sp0                                                                                       | 3 | 2  | 86  |
| 83  | GalNAca1-3(Fuca1-2)Galb1-4(Fuca1-3)GlcNAcb-Sp0                                                                        | 3 | 10 | 360 |
| 130 | Fuca1-4(Galb1-3)GlcNAcb-Sp8                                                                                           | 3 | 7  | 278 |
| 161 | Galb1-4GlcNAcb1-3Galb1-4(Fuca1-3)GlcNAcb1-3Galb1-4(Fuca1-3)GlcNAcb-Sp0                                                | 3 | 3  | 123 |
| 532 | Galb1-4GlcNAcb1-2 Mana1-6(Galb1-4GlcNAcb1-4)(Galb1-4GlcNAcb1-2Mana1-3)Manb1-4GlcNAcb1-4(Fuca1-6)GlcNAc-Sp21           | 3 | 2  | 65  |
| 383 | Galb1-4(Fuca1-3)GlcNAcb1-6(Galb1-3GlcNAcb1-3)Galb1-4Glc-Sp21                                                          | 2 | 7  | 293 |
| 331 | Neu5Aca2-3Galb1-3(Fuca1-4)GlcNAcb1-3Galb1-3(Fuca1-4)GlcNAcb-Sp0                                                       | 2 | 2  | 108 |
| 23  | 6S(3S)Galb1-4GlcNAcb-Sp0                                                                                              | 2 | 5  | 232 |
| 310 | GlcNAcb1-4GlcNAcb-Sp10                                                                                                | 2 | 6  | 307 |
| 479 | Neu5Aca2-3Galb1-4GlcNAcb1-6GalNAca-Sp14                                                                               | 2 | 5  | 285 |
| 539 | GlcNAcb1-3Galb1-4GlcNAcb1-2Mana1-6(GlcNAcb1-3Galb1-4GlcNAcb1-2Mana1-3)Manb1-4GlcNAcb1-4GlcNAcb-Sp12                   | 2 | 9  | 475 |
| 175 | GlcNAcb1-2Galb1-3GalNAca-Sp8                                                                                          | 2 | 8  | 447 |
| 145 | Galb1-3GalNAcb1-4Galb1-4Glc-Sp8                                                                                       | 2 | 7  | 417 |
| 594 | GlcNAcb1-3Galb1-4GlcNAcb1-6(Galb1-3)GalNAca-Sp14                                                                      | 2 | 7  | 444 |
| 512 | (6S)GalNAcb1-4GlcNAc-Sp8                                                                                              | 2 | 5  | 305 |
| 387 | Galb1-4GlcNAcb1-6(Galb1-4GlcNAcb1-2)Mana1-6(Galb1-4GlcNAcb1-4(Galb1-4GlcNAcb1-2)Mana1-3)Manb1-4GlcNAcb1-4GlcNAcb-Sp21 | 1 | 5  | 336 |
| 386 | Galb1-3GlcNAcb1-3Galb1-4(Fuca1-3)GlcNAcb1-6(Galb1-3GlcNAcb1-3)Galb1-4Glc-Sp21                                         | 1 | 6  | 400 |
| 592 | Neu5Aca2-3Galb1-4GlcNAcb1-3Galb1-4GlcNAcb1-3GalNAca-Sp14                                                              | 1 | 3  | 203 |

|     |                                                                                                                                                                                  |     |    |        |
|-----|----------------------------------------------------------------------------------------------------------------------------------------------------------------------------------|-----|----|--------|
| 313 | Mana1-6Manb-Sp10                                                                                                                                                                 | 1   | 3  | 238    |
| 590 | Galb1-4GlcNAcb1-3Galb1-4GlcNAcb1-6(Galb1-3)GalNAca-Sp14                                                                                                                          | 1   | 7  | 494    |
| 35  | (3S)Galb1-4(6S)GlcNAcb-Sp8                                                                                                                                                       | 1   | 10 | 757    |
| 418 | GalNAca1-3(Fuca1-2)Galb1-4(Fuca1-3)GlcNAcb1-3GalNAc-Sp14                                                                                                                         | 1   | 5  | 426    |
| 438 | Galb1-4GlcNAcb1-6(Galb1-4GlcNAcb1-2)Mana1-6(GlcNAcb1-4)(Galb1-4GlcNAcb1-4)(Galb1-4GlcNAcb1-2)Mana1-3)Manb1-4GlcNAcb1-4GlcNAc-Sp21                                                | 1   | 8  | 626    |
| 333 | Gala1-4Galb1-4GlcNAcb1-3Galb1-4Glc-Sp0                                                                                                                                           | 1   | 12 | 1085   |
| 555 | Neu5Gca2-8Neu5Gca2-3Galb1-4GlcNAcb1-3Galb1-4GlcNAc-Sp0                                                                                                                           | 1   | 4  | 351    |
| 434 | GlcNAcb1-6(GlcNAcb1-2)Mana1-6(GlcNAcb1-4)(GlcNAcb1-4)(GlcNAcb1-2)Mana1-3)Manb1-4GlcNAcb1-4GlcNAc-Sp21                                                                            | 1   | 4  | 363    |
| 230 | Neu5Aca2-3(6S)Galb1-4(Fuca1-3)GlcNAcb-Sp8                                                                                                                                        | 1   | 7  | 641    |
| 196 | GlcA1-4GlcA-Sp8                                                                                                                                                                  | 1   | 3  | 247    |
| 436 | Galb1-4GlcNAcb1-2Mana1-6(GlcNAcb1-4)(Galb1-4GlcNAcb1-4)(Galb1-4GlcNAcb1-2)Mana1-3)Manb1-4GlcNAcb1-4GlcNAc-Sp21                                                                   | 1   | 5  | 463    |
| 306 | GalNAcb1-3Galb-Sp8                                                                                                                                                               | 1   | 3  | 341    |
| 79  | Fuca1-3GlcNAcb-Sp8                                                                                                                                                               | 1   | 4  | 485    |
| 200 | G-ol-Sp8                                                                                                                                                                         | 1   | 14 | 1855   |
| 285 | Neu5Gca2-6GalNAca-Sp0                                                                                                                                                            | 1   | 5  | 826    |
| 578 | GlcNAcb1-3Galb1-4GlcNAcb1-3Galb1-4GlcNAcb1-3Galb1-4GlcNAcb1-2Mana1-6(GlcNAcb1-3Galb1-4GlcNAcb1-3Galb1-4GlcNAcb1-3Galb1-4GlcNAcb1-2Mana1-3)Manb1-4GlcNAcb1-4(Fuca1-6)GlcNAcb-Sp24 | 0   | 4  | 1076   |
| 21  | GlcNAcb1-6(GlcNAcb1-4)(GlcNAcb1-3)GlcNAc-Sp8                                                                                                                                     | 0   | 5  | 1299   |
| 502 | Neu5Aca2-6GalNAcb1-4(6S)GlcNAcb-Sp8                                                                                                                                              | 0   | 5  | 1181   |
| 158 | Galb1-4GalNAcb1-3(Fuca1-2)Galb1-4GlcNAcb-Sp8                                                                                                                                     | 0   | 17 | -21991 |
| 262 | Fuca1-2Galb1-4(6S)Glc-Sp0                                                                                                                                                        | 0   | 7  | -1761  |
| 580 | GlcNAcb1-3Galb1-4GlcNAcb1-3Galb1-4GlcNAcb1-3Galb1-4GlcNAcb1-3Galb1-4GlcNAcb1-2Mana1-6(GlcNAcb1-3Galb1-4GlcNAcb1-3Galb1-4GlcNAcb1-2Mana1-3)Manb1-4GlcNAcb1-4(Fuca1-6)GlcNAcb-Sp19 | -1  | 5  | -824   |
| 403 | Gala1-4Galb1-3GlcNAcb1-2Mana1-6(Gala1-4Galb1-3GlcNAcb1-2Mana1-3)Manb1-4GlcNAcb1-4GlcNAcb-Sp19                                                                                    | -1  | 4  | -424   |
| 156 | Galb1-4(6S)Glc-Sp8                                                                                                                                                               | -1  | 6  | -643   |
| 302 | Galb1-4GlcNAcb1-6(Galb1-4GlcNAcb1-3)Galb1-4GlcNAc-Sp0                                                                                                                            | -1  | 11 | -1149  |
| 220 | Fuca1-2(6S)Galb1-4GlcNAcb-Sp0                                                                                                                                                    | -2  | 6  | -417   |
| 517 | Galb1-4(6P)GlcNAcb-Sp0                                                                                                                                                           | -2  | 3  | -174   |
| 597 | Neu5Aca2-6Galb1-4GlcNAcb1-3Galb1-4GlcNAcb1-3GalNAca-Sp14                                                                                                                         | -2  | 6  | -295   |
| 609 | GlcNAcb1-3Fuca-Sp21                                                                                                                                                              | -2  | 11 | -541   |
| 440 | Galb1-6Galb-Sp10                                                                                                                                                                 | -2  | 4  | -181   |
| 143 | Galb1-3GalNAcb1-3Gala1-4Galb1-4Glc-Sp0                                                                                                                                           | -2  | 4  | -176   |
| 309 | GlcNAcb1-3Man-Sp10                                                                                                                                                               | -2  | 4  | -190   |
| 312 | MurNAcb1-4GlcNAcb-Sp10                                                                                                                                                           | -2  | 11 | -513   |
| 131 | Galb1-4GlcNAcb1-6GalNAca-Sp8                                                                                                                                                     | -3  | 7  | -286   |
| 526 | Neu5Aca2-3Galb1-3GlcNAcb1-2Mana-Sp0                                                                                                                                              | -3  | 3  | -113   |
| 19  | Galb1-4GlcNAcb1-6(Galb1-4GlcNAcb1-3)GalNAca-Sp8                                                                                                                                  | -3  | 10 | -343   |
| 599 | Galb1-4GlcNAcb1-3Galb1-3GalNAca-Sp14                                                                                                                                             | -3  | 6  | -223   |
| 277 | Galb1-3(Fuca1-4)GlcNAcb1-3Galb1-3(Fuca1-4)GlcNAcb-Sp0                                                                                                                            | -3  | 9  | -290   |
| 191 | GlcNAcb1-4GlcNAcb1-4GlcNAcb-Sp8                                                                                                                                                  | -3  | 2  | -67    |
| 420 | Fuca1-2Galb1-4GlcNAcb1-2Mana1-6(Fuca1-2Galb1-4GlcNAcb1-2Mana1-3)Manb1-4GlcNAcb1-4(Fuca1-6)GlcNAcb-Sp22                                                                           | -4  | 3  | -90    |
| 516 | (4S)GalNAcb-Sp10                                                                                                                                                                 | -4  | 21 | -510   |
| 182 | GlcNAcb1-3Galb1-4GlcNAcb-Sp0                                                                                                                                                     | -4  | 12 | -275   |
| 133 | GlcNAcb1-6(Galb1-3)GalNAca-Sp8                                                                                                                                                   | -4  | 3  | -65    |
| 432 | GlcNAcb1-2Mana1-6(GlcNAcb1-4)(GlcNAcb1-2)Mana1-3)Manb1-4GlcNAcb1-4GlcNAc-Sp21                                                                                                    | -5  | 5  | -90    |
| 359 | KDNa2-3Galb1-3GalNAca-Sp14                                                                                                                                                       | -6  | 6  | -95    |
| 327 | Galb1-4(Fuca1-3)GlcNAcb1-2Mana1-6(Galb1-4(Fuca1-3)GlcNAcb1-2Mana1-3)Manb1-4GlcNAcb1-4GlcNAcb-Sp20                                                                                | -6  | 9  | -146   |
| 139 | Galb1-3GalNAca-Sp8                                                                                                                                                               | -7  | 5  | -76    |
| 245 | Neu5Aca2-3Galb-Sp8                                                                                                                                                               | -7  | 38 | -562   |
| 311 | GlcNAcb1-4GlcNAcb-Sp12                                                                                                                                                           | -7  | 4  | -51    |
| 337 | Neu5Aca2-3Galb1-4(Fuca1-3)GlcNAcb1-6(Neu5Aca2-3Galb1-3)GalNAc-Sp14                                                                                                               | -8  | 4  | -50    |
| 405 | Gala1-3Galb1-4GlcNAcb1-3GalNAca-Sp14                                                                                                                                             | -9  | 8  | -89    |
| 381 | Galb1-3GalNAca1-3(Fuca1-2)Galb1-4GlcNAc-Sp0                                                                                                                                      | -9  | 7  | -78    |
| 308 | Neu5Aca2-6Galb1-4GlcNAcb1-2Mana1-6(GlcNAcb1-2Mana1-3)Manb1-4GlcNAcb1-4GlcNAcb-Sp12                                                                                               | -9  | 10 | -104   |
| 128 | Galb1-3(Fuca1-4)GlcNAc-Sp0                                                                                                                                                       | -9  | 9  | -90    |
| 365 | Fuca1-4(Galb1-3)GlcNAcb1-2Mana1-6(Fuca1-4(Galb1-3)GlcNAcb1-2Mana1-3)Manb1-4GlcNAcb1-4(Fuca1-6)GlcNAcb-Sp22                                                                       | -10 | 25 | -256   |
| 184 | GlcNAcb1-3Galb1-4GlcNAcb1-3Galb1-4GlcNAcb-Sp0                                                                                                                                    | -10 | 3  | -31    |
| 14  | Manb-Sp8                                                                                                                                                                         | -10 | 44 | -422   |
| 40  | (4S)Galb1-4GlcNAcb-Sp8                                                                                                                                                           | -10 | 48 | -461   |
| 296 | 4S(3S)Galb1-4GlcNAcb-Sp0                                                                                                                                                         | -11 | 26 | -246   |
| 207 | Mana1-2Mana1-2Mana1-3Mana-Sp9                                                                                                                                                    | -12 | 25 | -215   |
| 36  | (3S)Galb1-4GlcNAcb-Sp0                                                                                                                                                           | -12 | 6  | -50    |
| 195 | GlcA1-4Glc-Sp8                                                                                                                                                                   | -13 | 5  | -38    |
| 354 | Galb1-3GlcNAcb1-2Mana1-6(Galb1-3GlcNAcb1-2Mana1-3)Manb1-4GlcNAcb1-4(Fuca1-6)GlcNAcb-Sp22                                                                                         | -16 | 17 | -109   |
| 595 | GlcNAcb1-3Galb1-4GlcNAcb1-6(GlcNAcb1-3Galb1-4GlcNAcb1-3)GalNAca-Sp14                                                                                                             | -22 | 29 | -130   |
| 406 | Galb1-3GlcNAcb1-6Galb1-4GlcNAcb-Sp0                                                                                                                                              | -23 | 13 | -56    |
| 500 | Fuca1-2Galb1-3(6S)GlcNAcb-Sp0                                                                                                                                                    | -23 | 4  | -17    |
| 321 | Neu5Aca2-8Neu5Acb-Sp17                                                                                                                                                           | -25 | 29 | -117   |
| 529 | Neu5Aca2-3Galb1-3GlcNAcb1-4Galb1-4Glc-Sp0                                                                                                                                        | -34 | 34 | -102   |
| 92  | GalNAca1-3Galb-Sp8                                                                                                                                                               | -34 | 32 | -93    |
| 408 | GalNAcb1-3Gala1-6Galb1-4Glc-Sp8                                                                                                                                                  | -34 | 15 | -43    |
| 379 | GalNAcb1-4GlcNAcb1-2Mana1-6(GlcNAcb1-4GlcNAcb1-2Mana1-3)Manb1-4GlcNAcb1-4GlcNAc-Sp12                                                                                             | -37 | 18 | -50    |
| 216 | Mana1-6(Mana1-3)Mana1-6(Mana1-3)Manb1-4GlcNAcb1-4GlcNAcb-Sp12                                                                                                                    | -40 | 36 | -90    |

Average RFU: indicates the average fluorescent unites from 4 independent determinations

STDv: standard deviation

% CV: variation coeficient

**Supplementary Table 3:** Statistics of data collection and refinement

|                                                     | Typhoid toxin                   |
|-----------------------------------------------------|---------------------------------|
| <b>Data collection</b>                              |                                 |
| Space group                                         | C222 <sub>1</sub>               |
| Cell dimensions                                     |                                 |
| <i>a, b, c</i> (Å)                                  | 78.386, 261.076, 109.896        |
| <i>a, b, g</i> (°)                                  | 90, 90, 90                      |
| Resolution (Å)                                      | 31.91 - 2.393 (2.479 - 2.393) * |
| <i>R</i> <sub>merge</sub>                           | 0.097 (0.724) *                 |
| <i>I</i> / <i>σ</i> <i>I</i>                        | 12.81 (2.62) *                  |
| Completeness (%)                                    | 97.14 (93.03) *                 |
| Redundancy                                          | 6.5(5.8) *                      |
|                                                     |                                 |
| <b>Refinement</b>                                   |                                 |
| Resolution (Å)                                      | 31.91 - 2.393                   |
| No. reflections                                     | 43127                           |
| <i>R</i> <sub>work</sub> / <i>R</i> <sub>free</sub> | 0.2075 / 0.2532                 |
| No. atoms                                           |                                 |
| Protein                                             | 8102                            |
| Glycerol                                            | 48                              |
| Water                                               | 382                             |
| B-factors                                           |                                 |
| Protein                                             | 48.60                           |
| Solvent                                             | 41.90                           |
| R.m.s deviations                                    |                                 |
| Bond lengths (Å)                                    | 0.004                           |
| Bond angles (°)                                     | 0.84                            |

Number of crystals for typhoid toxin structure is 1.

\*Highest resolution shell is shown in parenthesis.

Table S4: Glycan array analysis for binding to the typhoid toxin Ser35A mutant

| Glycan number | Glycan structure                                                                                                                                                                                                                                                                                                         | Average RFU | StDev | % CV |
|---------------|--------------------------------------------------------------------------------------------------------------------------------------------------------------------------------------------------------------------------------------------------------------------------------------------------------------------------|-------------|-------|------|
| 335           | GalNAca1-3(Fuca1-2)Galb1-4GlcNAcb1-3Galb1-4GlcNAcb-Sp0                                                                                                                                                                                                                                                                   | 2009        | 48    | 2    |
| 336           | GalNAca1-3(Fuca1-2)Galb1-4GlcNAcb1-3Galb1-4GlcNAcb1-3Galb1-4GlcNAcb-Sp0                                                                                                                                                                                                                                                  | 857         | 38    | 4    |
| 509           | Galb1-3GlcNAca1-3Galb1-4GlcNAcb-Sp8                                                                                                                                                                                                                                                                                      | 789         | 53    | 7    |
| 523           | GalNAca1-3(Fuca1-2)Galb1-4 GlcNAcb1-2Mana-Sp0                                                                                                                                                                                                                                                                            | 414         | 47    | 11   |
| 74            | Fuca1-2Galb1-4GlcNAcb1-3Galb1-4GlcNAcb1-3Galb1-4GlcNAcb-Sp0                                                                                                                                                                                                                                                              | 380         | 99    | 26   |
| 541           | Galb1-4GlcNAcb1-3Galb1-4GlcNAcb1-2Mana1-6(Galb1-4GlcNAcb1-3Galb1-4GlcNAcb1-2Mana1-3)Manb1-4GlcNAcb1-4GlcNAcb-Sp12                                                                                                                                                                                                        | 227         | 10    | 4    |
| 416           | Fuca1-2Galb1-4(Fuca1-3)GlcNAcb1-3GalNAca-Sp14                                                                                                                                                                                                                                                                            | 212         | 223   | 105  |
| 582           | Galb1-4GlcNAcb1-3Galb1-4GlcNAcb1-6(Galb1-4GlcNAcb1-3Galb1-4GlcNAcb1-2)Mana1-6(Galb1-4GlcNAcb1-3Galb1-4GlcNAcb1-2)Mana1-3)Manb1-4GlcNAcb1-4(Fuca1-6)GlcNAcb-Sp24                                                                                                                                                          | 185         | 210   | 114  |
| 588           | Galb1-4GlcNAcb1-3Galb1-4GlcNAcb1-3Galb1-4GlcNAcb1-3Galb1-4GlcNAcb1-6(Galb1-4GlcNAcb1-3Galb1-4GlcNAcb1-3Galb1-4GlcNAcb1-3Galb1-4GlcNAcb1-3Galb1-4GlcNAcb1-2)Mana1-6(Galb1-4GlcNAcb1-3Galb1-4GlcNAcb1-3Galb1-4GlcNAcb1-3Galb1-4GlcNAcb1-3Galb1-4GlcNAcb1-3Galb1-4GlcNAcb1-2)Mana1-3)Manb1-4GlcNAcb1-4(Fuca1-6)GlcNAcb-Sp24 | 176         | 274   | 155  |
| 545           | GlcNAcb1-3Galb1-4GlcNAcb1-3Galb1-4GlcNAcb1-2Mana1-6(GlcNAcb1-3Galb1-4GlcNAcb1-3Galb1-4GlcNAcb1-2)Mana1-3)Manb1-4GlcNAcb1-4GlcNAcb-Sp12                                                                                                                                                                                   | 150         | 24    | 16   |
| 606           | Neu5Aca2-6Galb1-4GlcNAcb1-3Galb1-4GlcNAcb1-3Galb1-4GlcNAcb1-2Mana1-6(Neu5Aca2-6Galb1-4GlcNAcb1-3Galb1-4GlcNAcb1-3Galb1-4GlcNAcb1-3Galb1-4GlcNAcb1-2)Mana1-3)Manb1-4GlcNAcb1-4GlcNAcb-Sp12                                                                                                                                | 125         | 17    | 14   |
| 233           | GalNAcb1-4(Neu5Aca2-3)Galb1-4Glc-Sp0                                                                                                                                                                                                                                                                                     | 116         | 215   | 185  |
| 584           | Galb1-4GlcNAcb1-3Galb1-4GlcNAcb1-3Galb1-4GlcNAcb1-6(Galb1-4GlcNAcb1-3Galb1-4GlcNAcb1-3Galb1-4GlcNAcb1-3Galb1-4GlcNAcb1-2)Mana1-6(Galb1-4GlcNAcb1-3Galb1-4GlcNAcb1-2)Mana1-3)Manb1-4GlcNAcb1-4(Fuca1-6)GlcNAcb-Sp24                                                                                                       | 112         | 24    | 21   |
| 586           | Galb1-4GlcNAcb1-3Galb1-4GlcNAcb1-3Galb1-4GlcNAcb1-6(Galb1-4GlcNAcb1-3Galb1-4GlcNAcb1-3Galb1-4GlcNAcb1-3Galb1-4GlcNAcb1-3Galb1-4GlcNAcb1-2)Mana1-6(Galb1-4GlcNAcb1-3Galb1-4GlcNAcb1-3Galb1-4GlcNAcb1-3Galb1-4GlcNAcb1-2)Mana1-3)Manb1-4GlcNAcb1-4(Fuca1-6)GlcNAcb-Sp24                                                    | 112         | 55    | 49   |
| 375           | Fuca1-4(Fuca1-2Galb1-3)GlcNAcb1-2Mana1-3(Fuca1-4(Fuca1-2Galb1-3)GlcNAcb1-2Mana1-3)Manb1-4GlcNAcb1-4GlcNAcb-Sp19                                                                                                                                                                                                          | 110         | 28    | 25   |
| 86            | GalNAca1-3(Fuca1-2)Galb1-4GlcNAcb-Sp8                                                                                                                                                                                                                                                                                    | 105         | 10    | 10   |
| 551           | Galb1-3GlcNAcb1-3Galb1-4GlcNAcb1-2Mana1-6(Galb1-3GlcNAcb1-3Galb1-4GlcNAcb1-2)Mana1-3)Manb1-4GlcNAcb1-4GlcNAcb-Sp25                                                                                                                                                                                                       | 100         | 127   | 128  |
| 319           | Galb1-4GlcNAcb1-2Mana1-6(Neu5Aca2-6Galb1-4GlcNAcb1-2)Mana1-3)Manb1-4GlcNAcb1-4GlcNAcb-Sp12                                                                                                                                                                                                                               | 98          | 163   | 166  |
| 372           | Gala1-3Galb1-4(Fuca1-3)GlcNAcb1-2Mana1-6(Gala1-3Galb1-4(Fuca1-3)GlcNAcb1-2)Mana1-3)Manb1-4GlcNAcb1-4GlcNAcb-Sp20                                                                                                                                                                                                         | 95          | 25    | 26   |
| 396           | Neu5Aca2-3Galb1-3GlcNAcb1-2Mana1-6(Neu5Aca2-3Galb1-3GlcNAcb1-2)Mana1-3)Manb1-4GlcNAcb1-4GlcNAcb-Sp19                                                                                                                                                                                                                     | 93          | 11    | 12   |
| 496           | Galb1-4(Fuca1-3)GlcNAcb1-2Mana-Sp0                                                                                                                                                                                                                                                                                       | 90          | 172   | 191  |
| 547           | Galb1-4GlcNAcb1-3Galb1-4GlcNAcb1-3Galb1-4GlcNAcb1-2Mana1-6(Galb1-4GlcNAcb1-3Galb1-4GlcNAcb1-3Galb1-4GlcNAcb1-3Galb1-4GlcNAcb1-2)Mana1-3)Manb1-4GlcNAcb1-4GlcNAcb-Sp12                                                                                                                                                    | 87          | 48    | 55   |
| 591           | Galb1-4GlcNAcb1-3Galb1-4GlcNAcb1-6(Galb1-4GlcNAcb1-3Galb1-4GlcNAcb1-3)GalNAca-Sp14                                                                                                                                                                                                                                       | 87          | 14    | 16   |
| 426           | Fuca1-2Galb1-3GlcNAcb1-2Mana1-6(Fuca1-2Galb1-3GlcNAcb1-2)Mana1-3)Manb1-4GlcNAcb1-4(Fuca1-6)GlcNAcb-Sp22                                                                                                                                                                                                                  | 85          | 4     | 4    |
| 576           | GlcNAcb1-3Galb1-4GlcNAcb1-3Galb1-4GlcNAcb1-2Mana1-6(GlcNAcb1-3Galb1-4GlcNAcb1-3Galb1-4GlcNAcb1-2)Mana1-3)Manb1-4GlcNAcb1-4(Fuca1-6)GlcNAcb-Sp24                                                                                                                                                                          | 83          | 29    | 35   |
| 395           | Gala1-3Galb1-3(Fuca1-4)GlcNAcb1-2Mana1-6(Gala1-3Galb1-3(Fuca1-4)GlcNAcb1-2)Mana1-3)Manb1-4GlcNAcb1-4GlcNAcb-Sp19                                                                                                                                                                                                         | 78          | 38    | 48   |
| 476           | Galb1-3GlcNAcb1-2Mana1-6(GlcNAcb1-4)Galb1-3GlcNAcb1-2)Mana1-3)Manb1-4GlcNAcb1-4GlcNAcb-Sp21                                                                                                                                                                                                                              | 78          | 65    | 83   |
| 544           | Fuca1-2Galb1-4GlcNAcb1-3Galb1-4GlcNAcb1-2Mana1-6(Fuca1-2Galb1-4GlcNAcb1-3Galb1-4GlcNAcb1-2)Mana1-3)Manb1-4GlcNAcb1-4GlcNAcb-Sp24                                                                                                                                                                                         | 72          | 29    | 40   |
| 394           | Gala1-3Galb1-3GlcNAcb1-2)Mana1-6(Gala1-3Galb1-3GlcNAcb1-2)Mana1-3)Manb1-4GlcNAcb1-4GlcNAcb-Sp19                                                                                                                                                                                                                          | 71          | 37    | 52   |
| 161           | Galb1-4GlcNAcb1-3Galb1-4(Fuca1-3)GlcNAcb1-3Galb1-4(Fuca1-3)GlcNAcb-Sp0                                                                                                                                                                                                                                                   | 67          | 95    | 142  |
| 559           | Galb1-4GlcNAcb1-3Galb1-4GlcNAcb1-6(Galb1-4GlcNAcb1-3Galb1-4GlcNAcb1-2)Mana1-6(Galb1-4GlcNAcb1-3Galb1-4GlcNAcb1-2)Mana1-3)Manb1-4GlcNAcb1-4GlcNAcb-Sp24                                                                                                                                                                   | 65          | 10    | 15   |
| 578           | GlcNAcb1-3Galb1-4GlcNAcb1-3Galb1-4GlcNAcb1-3Galb1-4GlcNAcb1-2)Mana1-6(GlcNAcb1-3Galb1-4GlcNAcb1-3Galb1-4GlcNAcb1-3Galb1-4GlcNAcb1-2)Mana1-3)Manb1-4GlcNAcb1-4(Fuca1-6)GlcNAcb-Sp24                                                                                                                                       | 65          | 10    | 15   |
| 362           | Fuca1-2Galb1-4(Fuca1-3)GlcNAcb1-2)Mana1-6(Fuca1-2Galb1-4(Fuca1-3)GlcNAcb1-2)Mana1-3)Manb1-4GlcNAcb1-4GlcNAcb-Sp20                                                                                                                                                                                                        | 65          | 34    | 52   |
| 444           | (6S)Galb1-3(6S)GlcNAcb-Sp0                                                                                                                                                                                                                                                                                               | 63          | 74    | 117  |
| 590           | Galb1-4GlcNAcb1-3Galb1-4GlcNAcb1-6(Galb1-3)GalNAca-Sp14                                                                                                                                                                                                                                                                  | 58          | 26    | 46   |
| 579           | Galb1-4GlcNAcb1-3Galb1-4GlcNAcb1-3Galb1-4GlcNAcb1-3Galb1-4GlcNAcb1-2)Mana1-6(Galb1-4GlcNAcb1-3Galb1-4GlcNAcb1-3Galb1-4GlcNAcb1-3Galb1-4GlcNAcb1-2)Mana1-3)Manb1-4GlcNAcb1-4(Fuca1-6)GlcNAcb-Sp24                                                                                                                         | 57          | 17    | 30   |
| 327           | Galb1-4(Fuca1-3)GlcNAcb1-2)Mana1-6(Galb1-4(Fuca1-3)GlcNAcb1-2)Mana1-3)Manb1-4GlcNAcb1-4GlcNAcb-Sp20                                                                                                                                                                                                                      | 56          | 76    | 136  |
| 82            | GalNAca1-3(Fuca1-2)Galb1-3GlcNAcb-Sp0                                                                                                                                                                                                                                                                                    | 55          | 19    | 36   |
| 585           | GlcNAcb1-3Galb1-4GlcNAcb1-3Galb1-4GlcNAcb1-3Galb1-4GlcNAcb1-6(GlcNAcb1-3Galb1-4GlcNAcb1-3Galb1-4GlcNAcb1-3Galb1-4GlcNAcb1-2)Mana1-6(GlcNAcb1-3Galb1-4GlcNAcb1-3Galb1-4GlcNAcb1-3Galb1-4GlcNAcb1-2)Mana1-3)Manb1-4GlcNAcb1-4(Fuca1-6)GlcNAcb-Sp24                                                                         | 54          | 28    | 51   |
| 371           | Gala1-3(Fuca1-2)Galb1-4GlcNAcb1-2)Mana1-6(Gala1-3(Fuca1-2)Galb1-4GlcNAcb1-2)Mana1-3)Manb1-4GlcNAcb1-4GlcNAcb-Sp20                                                                                                                                                                                                        | 53          | 21    | 39   |
| 587           | GlcNAcb1-3Galb1-4GlcNAcb1-3Galb1-4GlcNAcb1-3Galb1-4GlcNAcb1-6(GlcNAcb1-3Galb1-4GlcNAcb1-3Galb1-4GlcNAcb1-3Galb1-4GlcNAcb1-3Galb1-4GlcNAcb1-2)Mana1-6(GlcNAcb1-3Galb1-4GlcNAcb1-3Galb1-4GlcNAcb1-3Galb1-4GlcNAcb1-3Galb1-4GlcNAcb1-2)Mana1-3)Manb1-4GlcNAcb1-4(Fuca1-6)GlcNAcb-Sp24                                       | 52          | 21    | 40   |
| 420           | Fuca1-2Galb1-4GlcNAcb1-2)Mana1-6(Fuca1-2Galb1-4GlcNAcb1-2)Mana1-3)Manb1-4GlcNAcb1-4(Fuca1-6)GlcNAcb-Sp22                                                                                                                                                                                                                 | 52          | 23    | 45   |
| 423           | Gala1-3(Fuca1-2)Galb1-3GlcNAcb1-3GalNAc-Sp14                                                                                                                                                                                                                                                                             | 52          | 14    | 27   |
| 299           | Neu5Aca2-3Galb1-4(Fuca1-3)GlcNAcb1-6(Galb1-3)GalNAca-Sp14                                                                                                                                                                                                                                                                | 51          | 41    | 80   |
| 404           | Gala1-4Galb1-4GlcNAcb1-2)Mana1-6(Gala1-4Galb1-4GlcNAcb1-2)Mana1-3)Manb1-4GlcNAcb1-4GlcNAcb-Sp24                                                                                                                                                                                                                          | 50          | 17    | 34   |
| 223           | Neu5Aca2-3Galb1-3GalNAca-Sp8                                                                                                                                                                                                                                                                                             | 50          | 49    | 99   |
| 474           | Neu5Aca2-3Galb1-3GlcNAcb1-6(Neu5Aca2-3Galb1-3GlcNAcb1-2)Mana1-6(Neu5Aca2-3Galb1-3GlcNAcb1-2)Mana1-3)Manb1-4GlcNAcb1-4GlcNAcb-Sp19                                                                                                                                                                                        | 49          | 34    | 70   |
| 531           | Galb1-4GlcNAcb1-2 Mana1-6(GlcNAcb1-4)(Galb1-4GlcNAcb1-2)Mana1-3)Manb1-4GlcNAcb1-4(Fuca1-6)GlcNAcb-Sp21                                                                                                                                                                                                                   | 48          | 26    | 55   |
| 457           | GalNAca1-3(Fuca1-2)Galb1-3GlcNAcb1-2)Mana1-6(GalNAca1-3(Fuca1-2)Galb1-3GlcNAcb1-2)Mana1-3)Manb1-4GlcNAcb1-4(Fuca1-6)GlcNAcb-Sp22                                                                                                                                                                                         | 48          | 42    | 87   |
| 583           | GlcNAcb1-3Galb1-4GlcNAcb1-3Galb1-4GlcNAcb1-6(GlcNAcb1-3Galb1-4GlcNAcb1-3Galb1-4GlcNAcb1-2)Mana1-6(GlcNAcb1-3Galb1-4GlcNAcb1-3Galb1-4GlcNAcb1-3Galb1-4GlcNAcb1-2)Mana1-3)Manb1-4GlcNAcb1-4(Fuca1-6)GlcNAcb-Sp24                                                                                                           | 48          | 10    | 20   |
| 458           | Galb1-4GlcNAcb1-6(Galb1-4GlcNAcb1-2)Mana1-6(Galb1-4GlcNAcb1-2)Mana1-3)Manb1-4GlcNAcb1-4GlcNAcb-Sp19                                                                                                                                                                                                                      | 47          | 59    | 124  |
| 454           | GalNAca1-3(Fuca1-2)Galb1-4GlcNAcb1-2)Mana1-6(GalNAca1-3(Fuca1-2)Galb1-4GlcNAcb1-2)Mana1-3)Manb1-4GlcNAcb1-4(Fuca1-6)GlcNAcb-Sp22                                                                                                                                                                                         | 47          | 13    | 27   |
| 353           | Galb1-4GlcNAcb1-2)Mana1-6(Galb1-4GlcNAcb1-2)Mana1-3)Manb1-4GlcNAcb1-4(Fuca1-6)GlcNAcb-Sp22                                                                                                                                                                                                                               | 46          | 14    | 31   |

|     |                                                                                                                                                                                                                   |    |    |     |
|-----|-------------------------------------------------------------------------------------------------------------------------------------------------------------------------------------------------------------------|----|----|-----|
| 565 | Galb1-4GlcNAcb1-3Galb1-4GlcNAcb1-3Galb1-4GlcNAcb1-3Galb1-4GlcNAcb1-3Galb1-4GlcNAcb1-2Mana1-6(Galb1-4GlcNAcb1-3Galb1-4GlcNAcb1-3Galb1-4GlcNAcb1-3Galb1-4GlcNAcb1-2Mana1-3)Manb1-4GlcNAcb1-4GlcNAcb-Sp25            | 45 | 15 | 34  |
| 427 | Gala1-3(Fuca1-2)Galb1-4GlcNAcb1-2Mana1-6(Gala1-3(Fuca1-2)Galb1-4GlcNAcb1-2Mana1-3)Manb1-4GlcNAcb1-4(Fuca1-6)GlcNAcb-Sp22                                                                                          | 45 | 18 | 40  |
| 577 | Galb1-4GlcNAcb1-3Galb1-4GlcNAcb1-3Galb1-4GlcNAcb1-2Mana1-6(Galb1-4GlcNAcb1-3Galb1-4GlcNAcb1-3Galb1-4GlcNAcb1-2Mana1-3)Manb1-4GlcNAcb1-4(Fuca1-6)GlcNAcb-Sp24                                                      | 45 | 9  | 21  |
| 225 | GalNAcb1-4(Neu5Aca2-8Neu5Aca2-8Neu5Aca2-8Neu5Aca2-3)Galb1-4Glc-Sp0                                                                                                                                                | 44 | 15 | 34  |
| 352 | GlcNAcb1-2Mana1-6(GlcNAcb1-2Mana1-3)Manb1-4GlcNAcb1-4(Fuca1-6)GlcNAcb-Sp22                                                                                                                                        | 43 | 18 | 40  |
| 501 | Fuca1-2(6S)Galb1-3(6S)GlcNAcb-Sp0                                                                                                                                                                                 | 43 | 9  | 21  |
| 485 | Galb1-4GlcNAcb1-6(Galb1-4GlcNAcb1-2)Mana1-6(Galb1-4GlcNAcb1-2Mana1-3)Manb1-4GlcNAcb1-4(Fuca1-6)GlcNAcb-Sp24                                                                                                       | 43 | 19 | 45  |
| 6   | Fuca-Sp8                                                                                                                                                                                                          | 42 | 45 | 107 |
| 550 | Galb1-4GlcNAcb1-3Galb1-4GlcNAcb1-3Galb1-4GlcNAcb1-3Galb1-4GlcNAcb1-2Mana1-6(Galb1-4GlcNAcb1-3Galb1-4GlcNAcb1-3Galb1-4GlcNAcb1-3Galb1-4GlcNAcb1-2Mana1-3)Manb1-4GlcNAcb1-4GlcNAcb-Sp25                             | 41 | 24 | 58  |
| 291 | Galb1-4(Fuca1-3)(6S)Glc-Sp0                                                                                                                                                                                       | 41 | 17 | 41  |
| 608 | Neu5Aca2-6Galb1-4GlcNAcb1-3Galb1-4GlcNAcb1-2Mana1-6(Neu5Aca2-6Galb1-4GlcNAcb1-3Galb1-4GlcNAcb1-2Mana1-3)Manb1-4GlcNAcb1-4GlcNAcb-Sp12                                                                             | 40 | 12 | 31  |
| 428 | Galb1-3GlcNAcb1-6(Galb1-3GlcNAcb1-2)Mana1-6(Galb1-3GlcNAcb1-2Mana1-3)Manb1-4GlcNAcb1-4GlcNAcb-Sp19                                                                                                                | 40 | 7  | 16  |
| 363 | Gala1-3Galb1-4GlcNAcb1-2Mana1-6(Gala1-3Galb1-4GlcNAcb1-2Mana1-3)Manb1-4GlcNAcb1-4GlcNAcb-Sp20                                                                                                                     | 39 | 3  | 7   |
| 104 | Gala1-3(Fuca1-2)Galb1-4(Fuca1-3)GlcNAcb-Sp8                                                                                                                                                                       | 38 | 20 | 51  |
| 445 | Fuca1-2Galb1-4GlcNAcb1-2Mana1-6(Fuca1-2Galb1-4GlcNAcb1-2(Fuca1-2Galb1-4GlcNAcb1-4)Mana1-3)Manb1-4GlcNAcb1-4GlcNAcb-Sp12                                                                                           | 38 | 16 | 42  |
| 357 | KDNa2-6Galb1-4GlcNAcb-Sp0                                                                                                                                                                                         | 37 | 22 | 58  |
| 580 | GlcNAcb1-3Galb1-4GlcNAcb1-3Galb1-4GlcNAcb1-3Galb1-4GlcNAcb1-3Galb1-4GlcNAcb1-2Mana1-6(GlcNAcb1-3Galb1-4GlcNAcb1-3Galb1-4GlcNAcb1-3Galb1-4GlcNAcb1-2Mana1-3)Manb1-4GlcNAcb1-4(Fuca1-6)GlcNAcb-Sp19                 | 37 | 11 | 29  |
| 481 | Neu5Aca2-6Galb1-4GlcNAcb1-6(Neu5Aca2-6Galb1-4GlcNAcb1-3)GalNAca-Sp14                                                                                                                                              | 37 | 18 | 48  |
| 573 | Neu5Aca2-8Neu5Aca2-3Galb1-3GalNAcb1-4(Neu5Aca2-3)Galb1-4Glc-Sp21                                                                                                                                                  | 37 | 14 | 38  |
| 42  | (6S)Galb1-4Glc-Sp0                                                                                                                                                                                                | 36 | 23 | 65  |
| 598 | GlcNAcb1-3Galb1-4GlcNAcb1-3Galb1-4GlcNAcb1-3GalNAca-Sp14                                                                                                                                                          | 36 | 29 | 80  |
| 572 | Galb1-3GlcNAcb1-3Galb1-4GlcNAcb1-6(Galb1-3GlcNAcb1-3Galb1-4GlcNAcb1-2)Mana1-6(Galb1-3GlcNAcb1-3Galb1-4GlcNAcb1-2Mana1-3)Manb1-4GlcNAcb1-4(Fuca1-6)GlcNAcb-Sp24                                                    | 36 | 14 | 39  |
| 508 | Galb1-4GlcNAcb1-6(Galb1-4GlcNAcb1-2)Mana1-6(GlcNAcb1-4)Galb1-4GlcNAcb1-4(Galb1-4GlcNAcb1-2)Mana1-3)Manb1-4GlcNAcb1-4(Fuca1-6)GlcNAcb-Sp21                                                                         | 36 | 32 | 89  |
| 324 | Galb1-3GlcNAcb1-2Mana1-6(Galb1-3GlcNAcb1-2Mana1-3)Manb1-4GlcNAcb1-4GlcNAcb-Sp19                                                                                                                                   | 35 | 21 | 58  |
| 364 | Galb1-4GlcNAcb1-2Mana1-6(Mana1-3)Manb1-4GlcNAcb1-4GlcNAcb-Sp12                                                                                                                                                    | 35 | 10 | 30  |
| 334 | GalNAcb1-3Gala1-4Galb1-4GlcNAcb1-3Galb1-4Glc-Sp0                                                                                                                                                                  | 35 | 18 | 50  |
| 349 | Galb1-4GlcNAcb1-2Mana1-3Manb1-4GlcNAcb1-4GlcNAcb-Sp12                                                                                                                                                             | 35 | 15 | 42  |
| 361 | Fuca1-2Galb1-4GlcNAcb1-2Mana1-6(Fuca1-2Galb1-4GlcNAcb1-2Mana1-3)Manb1-4GlcNAcb1-4GlcNAcb-Sp20                                                                                                                     | 34 | 16 | 47  |
| 574 | GlcNAcb1-3Galb1-4GlcNAcb1-2Mana1-6(GlcNAcb1-3Galb1-4GlcNAcb1-2Mana1-3)Manb1-4GlcNAcb1-4(Fuca1-6)GlcNAcb-Sp24                                                                                                      | 33 | 10 | 31  |
| 490 | Galb1-3(Fuca1-4)GlcNAcb1-6GalNAca-Sp14                                                                                                                                                                            | 33 | 24 | 73  |
| 159 | Galb1-4GlcNAcb1-3GalNAca-Sp8                                                                                                                                                                                      | 33 | 50 | 153 |
| 453 | GalNAcb1-4Galb1-4Glc-Sp0                                                                                                                                                                                          | 33 | 11 | 35  |
| 564 | GlcNAcb1-3Galb1-4GlcNAcb1-3Galb1-4GlcNAcb1-3Galb1-4GlcNAcb1-2Mana1-6(GlcNAcb1-3Galb1-4GlcNAcb1-3Galb1-4GlcNAcb1-3Galb1-4GlcNAcb1-3Galb1-4GlcNAcb1-2Mana1-3)Manb1-4GlcNAcb1-4GlcNAcb-Sp25                          | 32 | 9  | 30  |
| 253 | Neu5Aca2-3Galb1-4(Fuca1-3)GlcNAcb1-3Galb1-4(Fuca1-3)GlcNAcb1-3Galb1-4(Fuca1-3)GlcNAcb-Sp0                                                                                                                         | 32 | 13 | 41  |
| 431 | GlcNAcb1-2Mana1-6(GlcNAcb1-4)(GlcNAcb1-2Mana1-3)Manb1-4GlcNAcb1-4GlcNAcb-Sp21                                                                                                                                     | 32 | 11 | 35  |
| 24  | (3S)Galb1-4(Fuca1-3)(6S)Glc-Sp0                                                                                                                                                                                   | 31 | 21 | 65  |
| 330 | Neu5Aca2-6Galb1-4GlcNAcb1-3Galb1-3GlcNAcb-Sp0                                                                                                                                                                     | 31 | 22 | 71  |
| 571 | Galb1-3GlcNAcb1-3Galb1-4GlcNAcb1-3Galb1-4GlcNAcb1-6(Galb1-3GlcNAcb1-3Galb1-4GlcNAcb1-3Galb1-4GlcNAcb1-2)Mana1-6(Galb1-3GlcNAcb1-3Galb1-4GlcNAcb1-3Galb1-4GlcNAcb1-2Mana1-3)Manb1-4GlcNAcb1-4(Fuca1-6)GlcNAcb-Sp24 | 31 | 2  | 8   |
| 342 | GalNAca1-4Galb1-4GlcNAcb1-3Galb1-4(Fuca1-3)GlcNAcb1-3Galb1-4(Fuca1-3)GlcNAcb-Sp0                                                                                                                                  | 31 | 18 | 61  |
| 4   | GalNAca-Sp8                                                                                                                                                                                                       | 31 | 14 | 47  |
| 365 | Fuca1-4(Galb1-3)GlcNAcb1-2Mana1-6(Fuca1-4(Galb1-3)GlcNAcb1-2Mana1-3)Manb1-4GlcNAcb1-4(Fuca1-6)GlcNAcb-Sp22                                                                                                        | 30 | 20 | 64  |
| 123 | Gala1-4GlcNAcb-Sp8                                                                                                                                                                                                | 30 | 15 | 50  |
| 144 | Galb1-3GalNAcb1-4(Neu5Aca2-3)Galb1-4Glc-Sp0                                                                                                                                                                       | 30 | 13 | 42  |
| 558 | GlcNAcb1-3Galb1-4GlcNAcb1-6(GlcNAcb1-3Galb1-4GlcNAcb1-2)Mana1-6(GlcNAcb1-3Galb1-4GlcNAcb1-2Mana1-3)Manb1-4GlcNAcb1-4GlcNAcb-Sp24                                                                                  | 29 | 8  | 29  |
| 310 | GlcNAcb1-4GlcNAcb-Sp10                                                                                                                                                                                            | 29 | 17 | 59  |
| 290 | Galb1-4(Fuca1-3)(6S)GlcNAcb-Sp0                                                                                                                                                                                   | 28 | 9  | 31  |
| 403 | Gala1-4Galb1-3GlcNAcb1-2Mana1-6(Gala1-4Galb1-3GlcNAcb1-2Mana1-3)Manb1-4GlcNAcb1-4GlcNAcb-Sp19                                                                                                                     | 28 | 9  | 30  |
| 153 | Galb1-4(Fuca1-3)GlcNAcb1-3Galb1-4(Fuca1-3)GlcNAcb-Sp0                                                                                                                                                             | 28 | 16 | 59  |
| 442 | GalNAcb1-6GalNAcb-Sp8                                                                                                                                                                                             | 28 | 7  | 25  |
| 116 | Gala1-3Galb1-4Glc-Sp0                                                                                                                                                                                             | 28 | 10 | 38  |
| 605 | Neu5Aca2-6Galb1-4GlcNAcb1-3Galb1-4GlcNAcb1-6(Neu5Aca2-6Galb1-4GlcNAcb1-3Galb1-4GlcNAcb1-3)GalNAca-Sp14                                                                                                            | 27 | 11 | 41  |
| 192 | GlcNAcb1-6GalNAca-Sp8                                                                                                                                                                                             | 27 | 11 | 40  |
| 355 | (6S)GlcNAcb1-3Galb1-4GlcNAcb-Sp0                                                                                                                                                                                  | 27 | 14 | 54  |
| 360 | Fuca1-2Galb1-3GlcNAcb1-2Mana1-6(Fuca1-2Galb1-3GlcNAcb1-2Mana1-3)Manb1-4GlcNAcb1-4GlcNAcb-Sp20                                                                                                                     | 27 | 6  | 23  |
| 201 | GlcAa-Sp8                                                                                                                                                                                                         | 27 | 6  | 24  |
| 333 | Gala1-4Galb1-4GlcNAcb1-3Galb1-4Glc-Sp0                                                                                                                                                                            | 27 | 17 | 65  |
| 369 | Galb1-4GlcNAcb1-2Mana1-6(Galb1-4GlcNAcb1-4(Galb1-4GlcNAcb1-2)Mana1-3)Manb1-4GlcNAcb1-4GlcNAcb-Sp21                                                                                                                | 27 | 9  | 34  |
| 109 | Gala1-4(Gala1-3)Galb1-4GlcNAcb-Sp8                                                                                                                                                                                | 26 | 11 | 42  |
| 287 | Neu5Gca-Sp8                                                                                                                                                                                                       | 26 | 11 | 44  |
| 351 | Mana1-6(Galb1-4GlcNAcb1-2Mana1-3)Manb1-4GlcNAcb1-4GlcNAcb-Sp12                                                                                                                                                    | 26 | 14 | 53  |
| 344 | GlcNAca1-4Galb1-3GalNAcb-Sp14                                                                                                                                                                                     | 26 | 15 | 58  |
| 448 | Galb1-4GlcNAcb1-2Mana-Sp0                                                                                                                                                                                         | 25 | 14 | 54  |
| 251 | Neu5Aca2-3Galb1-4(6S)GlcNAcb-Sp8                                                                                                                                                                                  | 25 | 15 | 61  |
| 103 | Gala1-3(Fuca1-2)Galb1-4(Fuca1-3)GlcNAcb-Sp0                                                                                                                                                                       | 25 | 14 | 55  |
| 188 | GlcNAcb1-4Galb1-4GlcNAcb-Sp8                                                                                                                                                                                      | 25 | 9  | 37  |
| 254 | Neu5Aca2-3Galb1-4(Fuca1-3)GlcNAcb-Sp0                                                                                                                                                                             | 25 | 17 | 69  |



|     |                                                                                                                                                                                                                 |    |    |     |
|-----|-----------------------------------------------------------------------------------------------------------------------------------------------------------------------------------------------------------------|----|----|-----|
| 97  | GalNAcb1-4(Fuca1-3)GlcNAcb-Sp0                                                                                                                                                                                  | 25 | 8  | 34  |
| 348 | Neu5Aca2-6Galb1-4GlcNAcb1-2Mana1-3Manb1-4GlcNAcb1-4GlcNAc-Sp12                                                                                                                                                  | 24 | 9  | 38  |
| 45  | (6S)Galb1-4(6S)Glc-Sp8                                                                                                                                                                                          | 24 | 11 | 45  |
| 466 | Neu5Aca2-6Galb1-4GlcNAcb1-6(Neu5Aca2-6Galb1-4GlcNAcb1-2)Mana1-6(GlcNAcb1-4)(Neu5Aca2-6Galb1-4GlcNAcb1-4)(Neu5Aca2-6Galb1-4GlcNAcb1-2)Mana1-3)Manb1-4GlcNAcb1-4GlcNAc-Sp21                                       | 24 | 6  | 25  |
| 345 | Neu5Aca2-6Galb1-4GlcNAcb1-2Mana1-6(Mana1-3)Manb1-4GlcNAcb1-4GlcNAc-Sp12                                                                                                                                         | 23 | 5  | 23  |
| 121 | Gala1-4Galb1-4GlcNAcb-Sp8                                                                                                                                                                                       | 23 | 11 | 46  |
| 227 | Neu5Aca2-8Neu5Aca2-8Neu5Aca2-3Galb1-4Glc-Sp0                                                                                                                                                                    | 23 | 12 | 51  |
| 563 | GalNAcb1-4GlcNAcb1-3GalNAcb1-4GlcNAcb-Sp0                                                                                                                                                                       | 23 | 11 | 46  |
| 212 | Mana1-2Mana1-6(Mana1-2Mana1-3)Mana1-6(Mana1-2Mana1-2Mana1-3)Manb1-4GlcNAcb1-4GlcNAc-Sp12                                                                                                                        | 23 | 18 | 77  |
| 240 | Neu5Aca2-3Galb1-3(Fuca1-4)GlcNAcb1-3Galb1-4(Fuca1-3)GlcNAcb-Sp0                                                                                                                                                 | 23 | 2  | 10  |
| 215 | Mana1-6(Mana1-3)Mana1-6(Mana1-2Mana1-3)Manb1-4GlcNAcb1-4GlcNAc-Sp12                                                                                                                                             | 23 | 15 | 67  |
| 102 | Gala1-3(Fuca1-2)Galb1-3GlcNAcb-Sp8                                                                                                                                                                              | 23 | 19 | 83  |
| 533 | Fuca1-4(Galb1-3)GlcNAcb1-2 Mana-Sp0                                                                                                                                                                             | 23 | 20 | 87  |
| 167 | Galb1-4GlcNAcb1-6(Galb1-3)GalNAc-Sp14                                                                                                                                                                           | 23 | 9  | 42  |
| 455 | Gala1-3(Fuca1-2)Galb1-3GlcNAcb1-2Mana1-6(Gala1-3(Fuca1-2)Galb1-3GlcNAcb1-2Mana1-3)Manb1-4GlcNAcb1-4(Fuca1-6)GlcNAcb-Sp22                                                                                        | 23 | 20 | 91  |
| 471 | Neu5Aca2-3Galb1-4GlcNAcb1-6(Neu5Aca2-3Galb1-4GlcNAcb1-3)GalNAc-Sp14                                                                                                                                             | 22 | 12 | 52  |
| 156 | Galb1-4(6S)Glc-Sp8                                                                                                                                                                                              | 22 | 19 | 85  |
| 511 | (6S)(4S)GalNAcb1-4GlcNAc-Sp8                                                                                                                                                                                    | 22 | 5  | 25  |
| 205 | KDNa2-3Galb1-3GlcNAcb-Sp0                                                                                                                                                                                       | 22 | 16 | 73  |
| 228 | GalNAcb1-4(Neu5Aca2-8Neu5Aca2-3)Galb1-4Glc-Sp0                                                                                                                                                                  | 22 | 12 | 55  |
| 194 | GlcNAcb1-6Galb1-4GlcNAcb-Sp8                                                                                                                                                                                    | 22 | 16 | 74  |
| 520 | Neu5Aca2-6Galb1-4GlcNAcb1-2Man-Sp0                                                                                                                                                                              | 22 | 6  | 29  |
| 440 | Galb1-6Galb-Sp10                                                                                                                                                                                                | 22 | 13 | 62  |
| 238 | Neu5Aca2-3Galb1-3(6S)GlcNAc-Sp8                                                                                                                                                                                 | 21 | 15 | 72  |
| 356 | KDNa2-3Galb1-4(Fuca1-3)GlcNAc-Sp0                                                                                                                                                                               | 21 | 12 | 54  |
| 479 | Neu5Aca2-3Galb1-4GlcNAcb1-6GalNAc-Sp14                                                                                                                                                                          | 21 | 16 | 73  |
| 378 | Neu5Aca2-3Galb1-4(Fuca1-3)GlcNAcb1-3GalNAc-Sp14                                                                                                                                                                 | 21 | 17 | 80  |
| 216 | Mana1-6(Mana1-3)Mana1-6(Mana1-3)Manb1-4GlcNAcb1-4GlcNAc-Sp12                                                                                                                                                    | 21 | 18 | 84  |
| 379 | GalNAcb1-4GlcNAcb1-2Mana1-6(GalNAcb1-4GlcNAcb1-2Mana1-3)Manb1-4GlcNAcb1-4GlcNAc-Sp12                                                                                                                            | 21 | 18 | 87  |
| 127 | Galb1-3GlcNAcb1-3Galb1-4(Fuca1-3)GlcNAcb-Sp0                                                                                                                                                                    | 21 | 13 | 61  |
| 200 | G-ol-Sp8                                                                                                                                                                                                        | 21 | 5  | 24  |
| 419 | Galb1-4(Fuca1-3)GlcNAcb1-2Mana1-6(Galb1-4(Fuca1-3)GlcNAcb1-2Mana1-3)Manb1-4GlcNAcb1-4(Fuca1-6)GlcNAcb-Sp22                                                                                                      | 21 | 25 | 117 |
| 229 | Neu5Aca2-8Neu5Aca2-8Neu5Aca-Sp8                                                                                                                                                                                 | 21 | 15 | 71  |
| 176 | GlcNAcb1-6(GlcNAcb1-3)GalNAc-Sp8                                                                                                                                                                                | 21 | 11 | 53  |
| 115 | Gala1-3Galb1-4GlcNAcb-Sp8                                                                                                                                                                                       | 21 | 5  | 25  |
| 64  | Fuca1-2Galb1-3GalNAcb1-4(Neu5Aca2-3)Galb1-4Glc-Sp9                                                                                                                                                              | 21 | 13 | 62  |
| 332 | Neu5Aca2-6Galb1-4GlcNAcb1-3Galb1-4GlcNAcb1-3Galb1-4GlcNAcb-Sp0                                                                                                                                                  | 21 | 10 | 47  |
| 275 | Neu5Aca2-8Neu5Aca-Sp8                                                                                                                                                                                           | 21 | 9  | 42  |
| 436 | Galb1-4GlcNAcb1-2Mana1-6(GlcNAcb1-4)(Galb1-4GlcNAcb1-4(Galb1-4GlcNAcb1-2)Mana1-3)Manb1-4GlcNAcb1-4GlcNAc-Sp21                                                                                                   | 20 | 16 | 79  |
| 40  | (4S)Galb1-4GlcNAcb-Sp8                                                                                                                                                                                          | 20 | 45 | 221 |
| 325 | Neu5Aca2-3Galb1-4GlcNAcb1-2Mana1-6(Neu5Aca2-3Galb1-4GlcNAcb1-2Mana1-3)Manb1-4GlcNAcb1-4GlcNAc-Sp12                                                                                                              | 20 | 7  | 35  |
| 417 | Gala1-3(Fuca1-2)Galb1-4(Fuca1-3)GlcNAcb1-3GalNAc-Sp14                                                                                                                                                           | 20 | 7  | 35  |
| 358 | KDNa2-3Galb1-4Glc-Sp0                                                                                                                                                                                           | 20 | 6  | 31  |
| 311 | GlcNAcb1-4GlcNAcb-Sp12                                                                                                                                                                                          | 20 | 13 | 65  |
| 456 | Neu5Aca2-6Galb1-4GlcNAcb1-6(Fuca1-2Galb1-3GlcNAcb1-3)Galb1-4Glc-Sp21                                                                                                                                            | 20 | 6  | 31  |
| 28  | (3S)Galb1-3(Fuca1-4)GlcNAcb-Sp8                                                                                                                                                                                 | 20 | 20 | 99  |
| 321 | Neu5Aca2-8Neu5Acb-Sp17                                                                                                                                                                                          | 20 | 11 | 54  |
| 464 | Neu5Aca2-6Galb1-4GlcNAcb1-4Mana1-6(GlcNAcb1-4)(Neu5Aca2-6Galb1-4GlcNAcb1-4)(Neu5Aca2-6Galb1-4GlcNAcb1-2)Mana1-3)Manb1-4GlcNAcb1-4GlcNAc-Sp21                                                                    | 20 | 8  | 39  |
| 412 | Neu5Aca2-3Galb1-3GalNAcb1-4(Neu5Aca2-8Neu5Aca2-3)Galb1-4Glc-Sp0                                                                                                                                                 | 20 | 11 | 56  |
| 350 | Galb1-4GlcNAcb1-2Mana1-6Manb1-4GlcNAcb1-4GlcNAc-Sp12                                                                                                                                                            | 19 | 16 | 85  |
| 284 | Neu5Gca2-3Galb1-4Glc-Sp0                                                                                                                                                                                        | 19 | 7  | 38  |
| 2   | Glc-Sp8                                                                                                                                                                                                         | 19 | 18 | 92  |
| 187 | GlcNAcb1-6(GlcNAcb1-4)GalNAc-Sp8                                                                                                                                                                                | 19 | 16 | 83  |
| 147 | Galb1-3GlcNAcb1-3Galb1-4GlcNAcb-Sp0                                                                                                                                                                             | 19 | 11 | 57  |
| 217 | Manb1-4GlcNAcb-Sp0                                                                                                                                                                                              | 19 | 5  | 29  |
| 145 | Galb1-3GalNAcb1-4Galb1-4Glc-Sp8                                                                                                                                                                                 | 19 | 14 | 75  |
| 392 | GalNAcb1-4(Neu5Aca2-3)Galb1-4GlcNAcb1-3GalNAc-Sp14                                                                                                                                                              | 19 | 14 | 71  |
| 446 | Fuca1-2Galb1-4(Fuca1-3)GlcNAcb1-2Mana1-6(Fuca1-2Galb1-4(Fuca1-3)GlcNAcb1-4(Fuca1-2Galb1-4(Fuca1-3)GlcNAcb1-2)Mana1-3)Manb1-4GlcNAcb1-4GlcNAc-Sp12                                                               | 19 | 10 | 53  |
| 589 | Galb1-4GlcNAcb1-3Galb1-4GlcNAcb1-3GalNAc-Sp14                                                                                                                                                                   | 19 | 4  | 21  |
| 117 | Gala1-3Galb1-4Glc-Sp10                                                                                                                                                                                          | 19 | 20 | 105 |
| 607 | Neu5Aca2-3Galb1-4GlcNAcb1-3Galb1-4GlcNAcb1-3Galb1-4GlcNAcb1-2Mana1-6(Neu5Aca2-3Galb1-4GlcNAcb1-3Galb1-4GlcNAcb1-3Galb1-4GlcNAcb1-2Mana1-3)Manb1-4GlcNAcb1-4GlcNAc-Sp12                                          | 19 | 14 | 75  |
| 5   | GalNAc-Sp15                                                                                                                                                                                                     | 19 | 10 | 54  |
| 308 | Neu5Aca2-6Galb1-4GlcNAcb1-2Mana1-6(GlcNAcb1-2Mana1-3)Manb1-4GlcNAcb1-4GlcNAc-Sp12                                                                                                                               | 19 | 13 | 70  |
| 581 | Galb1-4GlcNAcb1-3Galb1-4GlcNAcb1-3Galb1-4GlcNAcb1-3Galb1-4GlcNAcb1-3Galb1-4GlcNAcb1-2Mana1-6(Galb1-4GlcNAcb1-3Galb1-4GlcNAcb1-3Galb1-4GlcNAcb1-3Galb1-4GlcNAcb1-2Mana1-3)Manb1-4GlcNAcb1-4(Fuca1-6)GlcNAcb-Sp19 | 19 | 5  | 26  |
| 256 | Neu5Aca2-3Galb1-4(Fuca1-3)GlcNAcb1-3Galb-Sp8                                                                                                                                                                    | 19 | 15 | 78  |
| 249 | Neu5Aca2-3Galb1-3GlcNAcb-Sp0                                                                                                                                                                                    | 18 | 13 | 68  |
| 1   | Gala-Sp8                                                                                                                                                                                                        | 18 | 8  | 45  |
| 478 | Neu5Aca2-3Galb1-4GlcNAcb1-2Mana-Sp0                                                                                                                                                                             | 18 | 4  | 21  |



|     |                                                                                                                                              |    |    |     |
|-----|----------------------------------------------------------------------------------------------------------------------------------------------|----|----|-----|
| 15  | GalNAcb-Sp8                                                                                                                                  | 14 | 6  | 43  |
| 575 | Galb1-4GlcNAcb1-3Galb1-4GlcNAcb1-2Mana1-6(Galb1-4GlcNAcb1-3Galb1-4GlcNAcb1-2Mana1-3)Manb1-4GlcNAcb1-4(Fuca1-6)GlcNAcb-Sp24                   | 14 | 4  | 31  |
| 164 | Galb1-4GlcNAcb1-3Galb1-4Glc-Sp0                                                                                                              | 14 | 11 | 76  |
| 261 | Neu5Aca2-3Galb1-4GlcNAcb1-3Galb1-4GlcNAcb-Sp0                                                                                                | 14 | 23 | 165 |
| 135 | Neu5Aca2-6(Galb1-3)GalNAca-Sp8                                                                                                               | 14 | 14 | 96  |
| 248 | Fuca1-2(6S)Galb1-4Glc-Sp0                                                                                                                    | 14 | 17 | 122 |
| 354 | Galb1-3GlcNAcb1-2Mana1-6(Galb1-3GlcNAcb1-2Mana1-3)Manb1-4GlcNAcb1-4(Fuca1-6)GlcNAcb-Sp22                                                     | 14 | 6  | 45  |
| 328 | Neu5,9Ac2a2-3Galb1-4GlcNAcb-Sp0                                                                                                              | 14 | 10 | 70  |
| 278 | Neu5Acb2-6GalNAca-Sp8                                                                                                                        | 14 | 10 | 74  |
| 199 | Glc1-6Glc-Sp8                                                                                                                                | 14 | 8  | 59  |
| 263 | Neu5Aca2-3Galb1-4Glc-Sp0                                                                                                                     | 14 | 7  | 49  |
| 406 | Galb1-3GlcNAcb1-6Galb1-4GlcNAcb-Sp0                                                                                                          | 14 | 9  | 68  |
| 101 | Gala1-3(Fuca1-2)Galb1-3GlcNAcb-Sp0                                                                                                           | 14 | 8  | 57  |
| 447 | Galb1-4(Fuca1-3)GlcNAcb1-6GalNAc-Sp14                                                                                                        | 13 | 7  | 50  |
| 9   | Neu5Aca-Sp8                                                                                                                                  | 13 | 9  | 64  |
| 570 | (3S)GlcAb1-3Galb1-4GlcNAcb1-2Mana-Sp0                                                                                                        | 13 | 13 | 100 |
| 247 | Neu5Aca2-3Galb1-3GlcNAcb1-3Galb1-4GlcNAcb-Sp0                                                                                                | 13 | 10 | 72  |
| 91  | GalNAca1-3GalNAcb-Sp8                                                                                                                        | 13 | 8  | 63  |
| 317 | Neu5Aca2-3Galb1-4GlcNAcb1-6(Neu5Aca2-3Galb1-3)GalNAca-Sp14                                                                                   | 13 | 12 | 93  |
| 274 | Neu5Aca2-6Galb-Sp8                                                                                                                           | 13 | 20 | 148 |
| 47  | (6S)GlcNAcb-Sp8                                                                                                                              | 13 | 4  | 30  |
| 556 | Neu5Gca2-8Neu5Gca2-6Galb1-4GlcNAc-Sp0                                                                                                        | 13 | 15 | 114 |
| 160 | Galb1-4GlcNAcb1-3GalNAc-Sp14                                                                                                                 | 13 | 3  | 25  |
| 193 | GlcNAcb1-6GalNAca-Sp14                                                                                                                       | 13 | 6  | 48  |
| 277 | Galb1-3(Fuca1-4)GlcNAcb1-3Galb1-3(Fuca1-4)GlcNAcb-Sp0                                                                                        | 13 | 10 | 75  |
| 259 | Neu5Aca2-3Galb1-4GlcNAcb-Sp0                                                                                                                 | 13 | 8  | 63  |
| 294 | Neu5Aca2-3Galb1-3GlcNAcb1-3Galb1-3GlcNAcb-Sp0                                                                                                | 13 | 15 | 118 |
| 429 | Galb1-4GlcNAcb1-6(Fuca1-2Galb1-3GlcNAcb1-3)Galb1-4Glc-Sp21                                                                                   | 13 | 20 | 151 |
| 49  | Neu5,9Ac2a2-6Galb1-4GlcNAcb-Sp8                                                                                                              | 13 | 7  | 51  |
| 46  | Neu5Aca2-3(6S)Galb1-4GlcNAcb-Sp8                                                                                                             | 13 | 18 | 136 |
| 245 | Neu5Aca2-3Galb-Sp8                                                                                                                           | 13 | 8  | 63  |
| 482 | Neu5Aca2-6Galb1-4GlcNAcb1-2Mana1-6(Neu5Aca2-6Galb1-4GlcNAcb1-2Mana1-3)Manb1-4GlcNAcb1-4(Fuca1-6)GlcNAcb-Sp24                                 | 13 | 11 | 83  |
| 495 | Gala1-3Galb1-4GlcNAcb1-6GalNAca-Sp14                                                                                                         | 13 | 9  | 73  |
| 373 | GalNAca1-3(Fuca1-2)Galb1-3GlcNAcb1-2Mana1-6(GalNAca1-3(Fuca1-2)Galb1-3GlcNAcb1-2Mana1-3)Manb1-4GlcNAcb1-4GlcNAcb-Sp20                        | 13 | 14 | 113 |
| 68  | Fuca1-2Galb1-3GlcNAcb-Sp8                                                                                                                    | 13 | 5  | 41  |
| 69  | Fuca1-2Galb1-4(Fuca1-3)GlcNAcb1-3Galb1-4(Fuca1-3)GlcNAcb-Sp0                                                                                 | 13 | 5  | 40  |
| 25  | (3S)Galb1-4Glc-Sp8                                                                                                                           | 13 | 16 | 123 |
| 367 | Neu5Aca2-6GlcNAcb1-4GlcNAcb1-4GlcNAc-Sp21                                                                                                    | 13 | 8  | 62  |
| 402 | GalNAca1-3GalNAcb1-3Gala1-4Galb1-4GlcNAcb-Sp0                                                                                                | 13 | 7  | 57  |
| 510 | Galb1-3(6S)GlcNAcb-Sp8                                                                                                                       | 13 | 5  | 40  |
| 79  | Fuca1-3GlcNAcb-Sp8                                                                                                                           | 12 | 17 | 137 |
| 418 | GalNAca1-3(Fuca1-2)Galb1-4(Fuca1-3)GlcNAcb1-3GalNAc-Sp14                                                                                     | 12 | 9  | 71  |
| 306 | GalNAcb1-3Galb-Sp8                                                                                                                           | 12 | 8  | 67  |
| 126 | Galb1-3(Fuca1-4)GlcNAcb1-3Galb1-4(Fuca1-3)GlcNAcb-Sp0                                                                                        | 12 | 17 | 140 |
| 610 | Galb1-3GalNAcb1-4(Neu5Aca2-8Neu5Aca2-8Neu5Aca2-3)Galb1-4Glc-Sp21                                                                             | 12 | 7  | 56  |
| 37  | (3S)Galb1-4GlcNAcb-Sp8                                                                                                                       | 12 | 11 | 89  |
| 343 | GlcNAca1-4Galb1-4GlcNAcb1-3Galb1-4GlcNAcb-Sp0                                                                                                | 12 | 8  | 67  |
| 48  | Neu5,9Ac <sub>2</sub> a-Sp8                                                                                                                  | 12 | 6  | 51  |
| 492 | (3S)Galb1-3(Fuca1-4)GlcNAcb-Sp0                                                                                                              | 12 | 10 | 83  |
| 512 | (6S)GalNAcb1-4GlcNAc-Sp8                                                                                                                     | 12 | 8  | 69  |
| 557 | Neu5Aca2-8Neu5Aca2-3Galb1-4GlcNAc-Sp0                                                                                                        | 12 | 6  | 52  |
| 66  | Fuca1-2Galb1-3GlcNAcb1-3Galb1-4Glc-Sp10                                                                                                      | 12 | 3  | 22  |
| 382 | Galb1-3GlcNAcb1-3Galb1-4GlcNAcb1-6(Galb1-3GlcNAcb1-3)Galb1-4Glc-Sp0                                                                          | 12 | 5  | 44  |
| 389 | Fuca1-2Galb1-3GalNAca1-3(Fuca1-2)Galb1-4Glc-Sp0                                                                                              | 12 | 6  | 52  |
| 380 | Galb1-3GalNAca1-3(Fuca1-2)Galb1-4Glc-Sp0                                                                                                     | 12 | 8  | 69  |
| 451 | GalNAca1-3(Fuca1-2)Galb1-4GlcNAcb1-6(GalNAca1-3(Fuca1-2)Galb1-4GlcNAcb1-3)GalNAc-Sp14                                                        | 12 | 10 | 87  |
| 18  | GlcN(Gc)b-Sp8                                                                                                                                | 12 | 9  | 79  |
| 307 | GlcAb1-3GlcNAcb-Sp8                                                                                                                          | 11 | 14 | 123 |
| 413 | Gala1-3(Fuca1-2)Galb1-4GlcNAcb1-3GalNAca-Sp14                                                                                                | 11 | 3  | 29  |
| 398 | Galb1-4GlcNAcb1-2Mana1-6(GlcNAcb1-2Mana1-3)Manb1-4GlcNAcb1-4GlcNAc-Sp12                                                                      | 11 | 4  | 39  |
| 537 | Gala1-3(Fuca1-2)Galb1-3GalNAcb1-3Gala1-4Galb1-4Glc-Sp21                                                                                      | 11 | 6  | 57  |
| 465 | Neu5Aca2-6Galb1-4GlcNAcb1-6(Neu5Aca2-6Galb1-4GlcNAcb1-2)Mana1-6(GlcNAcb1-4)(Neu5Aca2-6Galb1-4GlcNAcb1-2Mana1-3)Manb1-4GlcNAcb1-4GlcNAcb-Sp21 | 11 | 8  | 70  |
| 38  | (3S)Galb-Sp8                                                                                                                                 | 11 | 11 | 98  |
| 596 | Neu5Aca2-3Galb1-4GlcNAcb1-3Galb1-4GlcNAcb1-6(Neu5Aca2-3Galb1-4GlcNAcb1-3Galb1-4GlcNAcb1-3)GalNAca-Sp14                                       | 11 | 14 | 130 |
| 470 | Gica1-4Gica1-4Gica1-4Glc-Sp10                                                                                                                | 11 | 4  | 39  |
| 397 | GlcNAcb1-2Mana1-6(Galb1-4GlcNAcb1-2Mana1-3)Manb1-4GlcNAcb1-4GlcNAc-Sp12                                                                      | 11 | 7  | 68  |
| 143 | Galb1-3GalNAcb1-3Gala1-4Galb1-4Glc-Sp0                                                                                                       | 11 | 3  | 25  |
| 219 | (3S)Galb1-4(Fuca1-3)(6S)GlcNAcb-Sp8                                                                                                          | 11 | 7  | 62  |
| 87  | GalNAca1-3(Fuca1-2)Galb1-4Glc-Sp0                                                                                                            | 11 | 4  | 34  |
| 494 | Fuca1-2Galb1-4GlcNAcb1-6GalNAca-Sp14                                                                                                         | 11 | 4  | 39  |

|     |                                                                                                                                               |    |    |     |
|-----|-----------------------------------------------------------------------------------------------------------------------------------------------|----|----|-----|
| 460 | Neu5Aca2-3Galb1-4GlcNAcb1-4Mana1-6(GlcNAcb1-4)(Neu5Aca2-3Galb1-4GlcNAcb1-4)(Neu5Aca2-3Galb1-4GlcNAcb1-2)Mana1-3)Manb1-4GlcNAcb1-4GlcNAcb-Sp21 | 11 | 3  | 26  |
| 422 | Fuca1-2Galb1-3GlcNAcb1-3GalNAc-Sp14                                                                                                           | 11 | 11 | 100 |
| 171 | Galb1-4Glc-Sp0                                                                                                                                | 11 | 2  | 15  |
| 604 | GlcNAcb1-6(Neu5Aca2-3Galb1-3)GalNAc-Sp14                                                                                                      | 11 | 6  | 60  |
| 185 | GlcNAcb1-3Galb1-4Glc-Sp0                                                                                                                      | 11 | 8  | 71  |
| 128 | Galb1-3(Fuca1-4)GlcNAc-Sp0                                                                                                                    | 11 | 14 | 128 |
| 196 | Glc1-4Glc-Sp8                                                                                                                                 | 11 | 5  | 45  |
| 514 | GalNAcb1-4(6S)GlcNAc-Sp8                                                                                                                      | 11 | 12 | 114 |
| 302 | Galb1-4GlcNAcb1-6(Galb1-4GlcNAcb1-3)Galb1-4GlcNAc-Sp0                                                                                         | 11 | 9  | 81  |
| 553 | Neu5Aca2-8Neu5Gca2-3Galb1-4GlcNAc-Sp0                                                                                                         | 11 | 12 | 113 |
| 242 | Neu5Aca2-3Galb1-3(6S)GalNAc-Sp8                                                                                                               | 11 | 7  | 67  |
| 296 | 4S(3S)Galb1-4GlcNAcb-Sp0                                                                                                                      | 11 | 7  | 66  |
| 241 | Neu5Aca2-3Galb1-4(Neu5Aca2-3Galb1-3)GlcNAcb-Sp8                                                                                               | 11 | 4  | 42  |
| 60  | Fuca1-2Galb1-3(Fuca1-4)GlcNAcb-Sp8                                                                                                            | 10 | 5  | 47  |
| 459 | Neu5Aca2-3Galb1-4GlcNAcb1-2Mana1-6(GlcNAcb1-4)(Neu5Aca2-3Galb1-4GlcNAcb1-2Mana1-3)Manb1-4GlcNAcb1-4GlcNAcb-Sp21                               | 10 | 7  | 63  |
| 198 | Glc1-4Glc-Sp8                                                                                                                                 | 10 | 6  | 59  |
| 31  | (3S)Galb1-3GlcNAcb-Sp8                                                                                                                        | 10 | 6  | 61  |
| 322 | Neu5Aca2-8Neu5Aca2-8Neu5Acb-Sp8                                                                                                               | 10 | 4  | 43  |
| 486 | Neu5Aca2-3Galb1-3GlcNAcb1-2Mana1-6(GlcNAcb1-4)(Neu5Aca2-3Galb1-3GlcNAcb1-2Mana1-3)Manb1-4GlcNAcb1-4GlcNAc-Sp21                                | 10 | 3  | 26  |
| 554 | Neu5Gca2-8Neu5Aca2-3Galb1-4GlcNAc-Sp0                                                                                                         | 10 | 6  | 56  |
| 175 | GlcNAcb1-2Galb1-3GalNAc-Sp8                                                                                                                   | 10 | 10 | 94  |
| 204 | GlcAb1-6Galb-Sp8                                                                                                                              | 10 | 6  | 62  |
| 114 | Gala1-3Galb1-3GlcNAcb-Sp0                                                                                                                     | 10 | 5  | 48  |
| 567 | Galb1-3GlcNAcb1-6(Galb1-3)GalNAc-Sp14                                                                                                         | 10 | 6  | 62  |
| 432 | GlcNAcb1-2Mana1-6(GlcNAcb1-4)(GlcNAcb1-4)(GlcNAcb1-2)Mana1-3)Manb1-4GlcNAcb1-4GlcNAc-Sp21                                                     | 10 | 4  | 35  |
| 44  | (6S)Galb1-4GlcNAcb-Sp8                                                                                                                        | 10 | 1  | 9   |
| 168 | Galb1-4GlcNAcb-Sp0                                                                                                                            | 10 | 5  | 54  |
| 139 | Galb1-3GalNAc-Sp8                                                                                                                             | 10 | 15 | 145 |
| 489 | Gala1-3Galb1-3GlcNAcb1-6GalNAc-Sp14                                                                                                           | 10 | 8  | 81  |
| 88  | GlcNAcb1-3Galb1-3GalNAc-Sp8                                                                                                                   | 10 | 3  | 27  |
| 425 | Gala1-3Galb1-3GlcNAcb1-3GalNAc-Sp14                                                                                                           | 10 | 5  | 49  |
| 12  | Galb-Sp8                                                                                                                                      | 10 | 7  | 72  |
| 368 | Galb1-4(Fuca1-3)GlcNAcb1-6(Fuca1-2Galb1-4GlcNAcb1-3)Galb1-4Glc-Sp21                                                                           | 10 | 3  | 30  |
| 55  | Neu5Aca2-6Galb1-4GlcNAcb1-2Mana1-6(Neu5Aca2-6Galb1-4GlcNAcb1-2Mana1-3)Manb1-4GlcNAcb1-4GlcNAcb-Sp12                                           | 10 | 8  | 84  |
| 130 | Fuca1-4(Galb1-3)GlcNAcb-Sp8                                                                                                                   | 10 | 3  | 33  |
| 461 | Neu5Aca2-3Galb1-4GlcNAcb1-6(Neu5Aca2-3Galb1-4GlcNAcb1-2)Mana1-6(GlcNAcb1-4)(Neu5Aca2-3Galb1-4GlcNAcb1-2Mana1-3)Manb1-4GlcNAcb1-4GlcNAcb-Sp21  | 10 | 13 | 131 |
| 391 | Galb1-3GlcNAcb1-3GalNAc-Sp14                                                                                                                  | 9  | 10 | 109 |
| 594 | GlcNAcb1-3Galb1-4GlcNAcb1-6(Galb1-3)GalNAc-Sp14                                                                                               | 9  | 6  | 60  |
| 184 | GlcNAcb1-3Galb1-4GlcNAcb1-3Galb1-4GlcNAcb-Sp0                                                                                                 | 9  | 7  | 75  |
| 439 | Galb1-4Galb-Sp10                                                                                                                              | 9  | 8  | 86  |
| 181 | GlcNAcb1-3Galb-Sp8                                                                                                                            | 9  | 6  | 63  |
| 57  | Neu5Aca2-6Galb1-4GlcNAcb1-2Mana1-6(Neu5Aca2-6Galb1-4GlcNAcb1-2Mana1-3)Manb1-4GlcNAcb1-4GlcNAcb-Sp24                                           | 9  | 6  | 59  |
| 169 | Galb1-4GlcNAcb-Sp8                                                                                                                            | 9  | 8  | 87  |
| 124 | Gala1-6Glc-Sp8                                                                                                                                | 9  | 10 | 108 |
| 595 | GlcNAcb1-3Galb1-4GlcNAcb1-6(GlcNAcb1-3Galb1-4GlcNAcb1-3)GalNAc-Sp14                                                                           | 9  | 8  | 87  |
| 488 | Galb1-3GlcNAcb1-6GalNAc-Sp14                                                                                                                  | 9  | 4  | 42  |
| 29  | (3S)Galb1-3GalNAc-Sp8                                                                                                                         | 9  | 9  | 96  |
| 280 | Neu5Gca2-3Galb1-3(Fuca1-4)GlcNAcb-Sp0                                                                                                         | 9  | 9  | 101 |
| 16  | GlcNAcb-Sp0                                                                                                                                   | 9  | 6  | 64  |
| 152 | Galb1-4(Fuca1-3)GlcNAcb-Sp8                                                                                                                   | 9  | 6  | 63  |
| 415 | GalNAc1-3GalNAcb1-3Gala1-4Galb1-4Glc-Sp0                                                                                                      | 9  | 8  | 84  |
| 110 | Gala1-3GalNAc-Sp8                                                                                                                             | 9  | 11 | 123 |
| 295 | Neu5Aca2-3Galb1-4GlcNAcb1-3Galb1-3GlcNAcb-Sp0                                                                                                 | 9  | 4  | 41  |
| 94  | GalNAcb1-3GalNAc-Sp8                                                                                                                          | 9  | 8  | 90  |
| 515 | (3S)GalNAcb1-4GlcNAc-Sp8                                                                                                                      | 9  | 2  | 18  |
| 151 | Galb1-4(Fuca1-3)GlcNAcb-Sp0                                                                                                                   | 9  | 7  | 77  |
| 340 | GlcNAc1-4Galb1-3GlcNAcb-Sp0                                                                                                                   | 9  | 5  | 59  |
| 172 | Galb1-4Glc-Sp8                                                                                                                                | 9  | 4  | 45  |
| 206 | KDNa2-3Galb1-4GlcNAcb-Sp0                                                                                                                     | 9  | 8  | 87  |
| 93  | GalNAc1-4(Fuca1-2)Galb1-4GlcNAcb-Sp8                                                                                                          | 9  | 13 | 146 |
| 158 | Galb1-4GalNAcb1-3(Fuca1-2)Galb1-4GlcNAcb-Sp8                                                                                                  | 9  | 3  | 37  |
| 27  | (3S)Galb1-4(6S)Glc-Sp8                                                                                                                        | 9  | 5  | 62  |
| 288 | Neu5Aca2-3Galb1-4GlcNAcb1-6(Galb1-3)GalNAc-Sp14                                                                                               | 9  | 5  | 58  |
| 80  | Fuca1-4GlcNAcb-Sp8                                                                                                                            | 9  | 3  | 30  |
| 149 | Galb1-3GlcNAcb-Sp0                                                                                                                            | 9  | 3  | 32  |
| 374 | Gala1-3(Fuca1-2)Galb1-3GlcNAcb1-2Mana1-6(Gala1-3(Fuca1-2)Galb1-3GlcNAcb1-2Mana1-3)Manb1-4GlcNAcb1-4GlcNAcb-Sp20                               | 9  | 6  | 73  |
| 146 | Galb1-3Galb-Sp8                                                                                                                               | 9  | 5  | 53  |
| 257 | Neu5Aca2-3Galb1-4(Fuca1-3)GlcNAcb1-3Galb1-4GlcNAcb-Sp8                                                                                        | 9  | 2  | 20  |
| 208 | Mana1-2Mana1-6(Mana1-2Mana1-3)Mana-Sp9                                                                                                        | 8  | 11 | 132 |
| 65  | Fuca1-2Galb1-3GlcNAcb1-3Galb1-4Glc-Sp8                                                                                                        | 8  | 3  | 35  |

|     |                                                                                                                                                                            |   |    |     |
|-----|----------------------------------------------------------------------------------------------------------------------------------------------------------------------------|---|----|-----|
| 441 | Neu5Aca2-3Galb1-4GlcNAcb1-3Galb-Sp8                                                                                                                                        | 8 | 3  | 37  |
| 203 | GlcAb1-3Galb-Sp8                                                                                                                                                           | 8 | 5  | 54  |
| 276 | Neu5Aca2-8Neu5Aca2-3Galb1-4Glc-Sp0                                                                                                                                         | 8 | 8  | 99  |
| 134 | GlcNAcb1-6(Galb1-3)GalNAca-Sp14                                                                                                                                            | 8 | 2  | 28  |
| 236 | Neu5Aca2-3GalNAca-Sp8                                                                                                                                                      | 8 | 8  | 95  |
| 437 | Galb1-4GlcNAcb1-6(Galb1-4GlcNAcb1-2)Mana1-6(GlcNAcb1-4)(Galb1-4GlcNAcb1-2Mana1-3)Manb1-4GlcNAcb1-4GlcNAc-Sp21                                                              | 8 | 4  | 52  |
| 411 | Galb1-3GalNAcb1-4(Neu5Aca2-8Neu5Aca2-3)Galb1-4Glc-Sp0                                                                                                                      | 8 | 7  | 81  |
| 538 | Galb1-3GalNAcb1-3Gal-Sp21                                                                                                                                                  | 8 | 6  | 68  |
| 513 | (3S)GalNAcb1-4(3S)GlcNAc-Sp8                                                                                                                                               | 8 | 3  | 37  |
| 524 | Galb1-3GlcNAcb1-2Mana-Sp0                                                                                                                                                  | 8 | 6  | 73  |
| 468 | Gala1-3(Fuca1-2)Galb1-3GalNAcb-Sp8                                                                                                                                         | 8 | 4  | 53  |
| 381 | Galb1-3GalNAca1-3(Fuca1-2)Galb1-4GlcNAc-Sp0                                                                                                                                | 8 | 7  | 84  |
| 407 | Galb1-3GlcNAca1-6Galb1-4GlcNAcb-Sp0                                                                                                                                        | 8 | 3  | 42  |
| 182 | GlcNAcb1-3Galb1-4GlcNAcb-Sp0                                                                                                                                               | 8 | 4  | 50  |
| 303 | GlcNAcb1-6(Galb1-4GlcNAcb1-3)Galb1-4GlcNAc-Sp0                                                                                                                             | 8 | 2  | 30  |
| 81  | Fucb1-3GlcNAcb-Sp8                                                                                                                                                         | 8 | 3  | 32  |
| 58  | Fuca1-2Galb1-3GalNAcb1-3Gala-Sp9                                                                                                                                           | 8 | 5  | 69  |
| 305 | Galb1-4GlcNAcb1-6Galb1-4GlcNAcb-Sp0                                                                                                                                        | 8 | 3  | 33  |
| 202 | GlcAb-Sp8                                                                                                                                                                  | 8 | 9  | 113 |
| 480 | Neu5Aca2-6Galb1-4GlcNAcb1-6GalNAca-Sp14                                                                                                                                    | 8 | 10 | 130 |
| 174 | GlcNAca1-6Galb1-4GlcNAcb-Sp8                                                                                                                                               | 8 | 10 | 124 |
| 95  | GalNAcb1-3(Fuca1-2)Galb-Sp8                                                                                                                                                | 8 | 7  | 94  |
| 7   | Fuca-Sp9                                                                                                                                                                   | 8 | 4  | 45  |
| 400 | Fuca1-2Galb1-4GlcNAcb1-3GalNAca-Sp14                                                                                                                                       | 8 | 6  | 80  |
| 67  | Fuca1-2Galb1-3GlcNAcb-Sp0                                                                                                                                                  | 8 | 5  | 65  |
| 34  | (3S)Galb1-4(6S)GlcNAcb-Sp0                                                                                                                                                 | 8 | 3  | 41  |
| 491 | Neu5Aca2-3Galb1-3GlcNAcb1-6GalNAca-Sp14                                                                                                                                    | 8 | 8  | 106 |
| 339 | GlcNAca1-4Galb1-4GlcNAcb-Sp0                                                                                                                                               | 8 | 6  | 81  |
| 281 | Neu5Gca2-3Galb1-3GlcNAcb-Sp0                                                                                                                                               | 8 | 12 | 150 |
| 561 | GlcNAcb1-3Galb1-4GlcNAcb1-6(GlcNAcb1-3Galb1-3)GalNAca-Sp14                                                                                                                 | 8 | 9  | 113 |
| 8   | Rhaa-Sp8                                                                                                                                                                   | 8 | 8  | 107 |
| 463 | Neu5Aca2-6Galb1-4GlcNAcb1-2Mana1-6(GlcNAcb1-4)(Neu5Aca2-6Galb1-4GlcNAcb1-2Mana1-3)Manb1-4GlcNAcb1-4GlcNAcb-Sp21                                                            | 8 | 8  | 104 |
| 522 | Gala1-3(Fuca1-2)Galb1-4GlcNAcb1-2Mana-Sp0                                                                                                                                  | 8 | 10 | 126 |
| 230 | Neu5Aca2-3(6S)Galb1-4(Fuca1-3)GlcNAcb-Sp8                                                                                                                                  | 8 | 8  | 109 |
| 52  | GlcNAcb1-2Mana1-6(GlcNAcb1-2Mana1-3)Manb1-4GlcNAcb1-4GlcNAcb-Sp12                                                                                                          | 8 | 3  | 38  |
| 377 | Neu5Aca2-6Galb1-4GlcNAcb1-3GalNAc-Sp14                                                                                                                                     | 8 | 3  | 43  |
| 39  | (6S)(4S)Galb1-4GlcNAcb-Sp0                                                                                                                                                 | 7 | 3  | 46  |
| 11  | Neu5Acb-Sp8                                                                                                                                                                | 7 | 5  | 71  |
| 235 | Neu5Aca2-6(Neu5Aca2-3)GalNAca-Sp8                                                                                                                                          | 7 | 7  | 94  |
| 224 | Neu5Aca2-3Galb1-3GalNAca-Sp14                                                                                                                                              | 7 | 7  | 94  |
| 269 | Neu5Aca2-6Galb1-4GlcNAcb-Sp8                                                                                                                                               | 7 | 6  | 76  |
| 266 | Neu5Aca2-6GalNAcb1-4GlcNAcb-Sp0                                                                                                                                            | 7 | 18 | 245 |
| 141 | Galb1-3GalNAca-Sp16                                                                                                                                                        | 7 | 6  | 78  |
| 338 | GlcNAca1-4Galb1-4GlcNAcb1-3Galb1-4GlcNAcb1-3Galb1-4GlcNAcb-Sp0                                                                                                             | 7 | 7  | 95  |
| 14  | Manb-Sp8                                                                                                                                                                   | 7 | 14 | 186 |
| 462 | Neu5Aca2-3Galb1-4GlcNAcb1-6(Neu5Aca2-3Galb1-4GlcNAcb1-2)Mana1-6(GlcNAcb1-4)(Neu5Aca2-3Galb1-4GlcNAcb1-4)(Neu5Aca2-3Galb1-4GlcNAcb1-2)Mana1-3)Manb1-4GlcNAcb1-4GlcNAcb-Sp21 | 7 | 6  | 86  |
| 129 | Galb1-3(Fuca1-4)GlcNAc-Sp8                                                                                                                                                 | 7 | 13 | 183 |
| 75  | Fuca1-2Galb1-4GlcNAcb-Sp0                                                                                                                                                  | 7 | 7  | 93  |
| 72  | Fuca1-2Galb1-4(Fuca1-3)GlcNAcb-Sp8                                                                                                                                         | 7 | 6  | 88  |
| 500 | Fuca1-2Galb1-3(6S)GlcNAcb-Sp0                                                                                                                                              | 7 | 14 | 203 |
| 142 | Galb1-3GalNAcb-Sp8                                                                                                                                                         | 7 | 4  | 61  |
| 78  | Fuca1-2Galb-Sp8                                                                                                                                                            | 7 | 7  | 105 |
| 186 | GlcNAcb1-4-MDPLys                                                                                                                                                          | 7 | 8  | 117 |
| 477 | Neu5Aca2-6Galb1-4GlcNAcb1-6(Galb1-3GlcNAcb1-3)Galb1-4Glc-Sp21                                                                                                              | 7 | 9  | 137 |
| 518 | (6P)Galb1-4GlcNAcb-Sp0                                                                                                                                                     | 7 | 16 | 238 |
| 113 | Gala1-3Galb1-4(Fuca1-3)GlcNAcb-Sp8                                                                                                                                         | 7 | 2  | 35  |
| 507 | GlcNAcb1-6(GlcNAcb1-2)Mana1-6(GlcNAcb1-4)(GlcNAcb1-4(GlcNAcb1-2)Mana1-3)Manb1-4GlcNAcb1-4(Fuca1-6)GlcNAc-Sp21                                                              | 7 | 6  | 87  |
| 209 | Mana1-2Mana1-3Mana-Sp9                                                                                                                                                     | 7 | 5  | 71  |
| 312 | MurNAcb1-4GlcNAcb-Sp10                                                                                                                                                     | 7 | 4  | 53  |
| 119 | Gala1-4(Fuca1-2)Galb1-4GlcNAcb-Sp8                                                                                                                                         | 7 | 5  | 75  |
| 77  | Fuca1-2Galb1-4Glc-Sp0                                                                                                                                                      | 7 | 6  | 86  |
| 506 | GalNAca1-3(Fuca1-2)Galb1-3GlcNAcb1-6GalNAca-Sp14                                                                                                                           | 7 | 5  | 79  |
| 337 | Neu5Aca2-3Galb1-4(Fuca1-3)GlcNAcb1-6(Neu5Aca2-3Galb1-3)GalNAc-Sp14                                                                                                         | 7 | 10 | 154 |
| 341 | GlcNAca1-4Galb1-4GlcNAcb1-3Galb1-4Glc-Sp0                                                                                                                                  | 7 | 10 | 146 |
| 140 | Galb1-3GalNAca-Sp14                                                                                                                                                        | 7 | 5  | 71  |
| 92  | GalNAca1-3Galb-Sp8                                                                                                                                                         | 7 | 6  | 90  |
| 475 | GlcNAcb1-6(GlcNAcb1-2)Mana1-6(GlcNAcb1-2Mana1-3)Manb1-4GlcNAcb1-4(Fuca1-6)GlcNAcb-Sp24                                                                                     | 7 | 9  | 143 |
| 35  | (3S)Galb1-4(6S)GlcNAcb-Sp8                                                                                                                                                 | 6 | 4  | 67  |
| 63  | Fuca1-2Galb1-3GalNAcb1-4(Neu5Aca2-3)Galb1-4Glc-Sp0                                                                                                                         | 6 | 3  | 47  |
| 552 | Neu5Gca2-8Neu5Gca2-3Galb1-4GlcNAc-Sp0                                                                                                                                      | 6 | 2  | 27  |
| 298 | (6P)Glc-Sp10                                                                                                                                                               | 6 | 4  | 68  |
| 237 | Neu5Aca2-3GalNAcb1-4GlcNAcb-Sp0                                                                                                                                            | 6 | 4  | 69  |

|     |                                                                                                                                       |   |    |     |
|-----|---------------------------------------------------------------------------------------------------------------------------------------|---|----|-----|
| 246 | Neu5Aca2-3Galb1-3GalNAcb1-3Gala1-4Galb1-4Glc-Sp0                                                                                      | 6 | 6  | 99  |
| 183 | GlcNAcb1-3Galb1-4GlcNAcb-Sp8                                                                                                          | 6 | 17 | 269 |
| 521 | Gala1-3Galb1-4GlcNAcb1-2Mana-Sp0                                                                                                      | 6 | 14 | 224 |
| 555 | Neu5Gca2-8Neu5Gca2-3Galb1-4GlcNAcb1-3Galb1-4GlcNAc-Sp0                                                                                | 6 | 2  | 37  |
| 150 | Galb1-3GlcNAcb-Sp8                                                                                                                    | 6 | 6  | 100 |
| 527 | Gala1-3Galb1-3GlcNAcb1-2Mana-Sp0                                                                                                      | 6 | 20 | 328 |
| 283 | Neu5Gca2-3Galb1-4GlcNAcb-Sp0                                                                                                          | 6 | 8  | 127 |
| 107 | Gala1-3(Fuca1-2)Galb-Sp8                                                                                                              | 6 | 3  | 48  |
| 21  | GlcNAcb1-6(GlcNAcb1-4)(GlcNAcb1-3)GlcNAc-Sp8                                                                                          | 6 | 5  | 81  |
| 180 | GlcNAcb1-3GalNAca-Sp14                                                                                                                | 6 | 9  | 160 |
| 148 | Galb1-3GlcNAcb1-3Galb1-4Glc-Sp10                                                                                                      | 6 | 3  | 45  |
| 405 | Gala1-3Galb1-4GlcNAcb1-3GalNAca-Sp14                                                                                                  | 6 | 3  | 51  |
| 592 | Neu5Aca2-3Galb1-4GlcNAcb1-3Galb1-4GlcNAcb1-3GalNAca-Sp14                                                                              | 6 | 9  | 151 |
| 89  | GalNAca1-3(Fuca1-2)Galb-Sp8                                                                                                           | 6 | 2  | 39  |
| 502 | Neu5Aca2-6GalNAcb1-4(6S)GlcNAcb-Sp8                                                                                                   | 6 | 10 | 185 |
| 318 | Neu5Aca2-6Galb1-4GlcNAcb1-2Mana1-6(Neu5Aca2-3Galb1-4GlcNAcb1-2Mana1-3)Manb1-4GlcNAcb1-4GlcNAcb-Sp12                                   | 6 | 3  | 61  |
| 108 | Gala1-3(Fuca1-2)Galb-Sp18                                                                                                             | 6 | 3  | 51  |
| 408 | GalNAcb1-3Gala1-6Galb1-4Glc-Sp8                                                                                                       | 6 | 4  | 77  |
| 239 | Neu5Aca2-3Galb1-3(Fuca1-4)GlcNAcb-Sp8                                                                                                 | 5 | 4  | 73  |
| 222 | Fuca1-2(6S)Galb1-4(6S)Glc-Sp0                                                                                                         | 5 | 18 | 324 |
| 106 | Gala1-3(Fuca1-2)Galb1-4Glc-Sp0                                                                                                        | 5 | 4  | 74  |
| 593 | GlcNAcb1-3Galb1-4GlcNAcb1-3GalNAca-Sp14                                                                                               | 5 | 2  | 38  |
| 56  | Neu5Aca2-6Galb1-4GlcNAcb1-2Mana1-6(Neu5Aca2-6Galb1-4GlcNAcb1-2Man-a1-3)Manb1-4GlcNAcb1-4GlcNAcb-Sp21                                  | 5 | 3  | 58  |
| 484 | Mana1-6(Mana1-3)Manb1-4GlcNAcb1-4(Fuca1-6)GlcNAcb-Sp19                                                                                | 5 | 3  | 64  |
| 487 | Neu5Aca2-6Galb1-4GlcNAcb1-6(Fuca1-2Galb1-4(Fuca1-3)GlcNAcb1-3)Galb1-4Glc-Sp21                                                         | 5 | 4  | 79  |
| 467 | Gala1-3(Fuca1-2)Galb1-3GalNAca-Sp8                                                                                                    | 5 | 4  | 79  |
| 430 | Fuca1-3GlcNAcb1-6(Galb1-4GlcNAcb1-3)Galb1-4Glc-Sp21                                                                                   | 5 | 5  | 88  |
| 503 | GalNAcb1-4(Fuca1-3)(6S)GlcNAcb-Sp8                                                                                                    | 5 | 5  | 88  |
| 516 | (4S)GalNAcb-Sp10                                                                                                                      | 5 | 2  | 46  |
| 53  | GlcNAcb1-2Mana1-6(GlcNAcb1-2Mana1-3)Manb1-4GlcNAcb1-4GlcNAcb-Sp13                                                                     | 5 | 8  | 151 |
| 163 | Galb1-4GlcNAcb1-3Galb1-4GlcNAcb-Sp0                                                                                                   | 5 | 3  | 59  |
| 293 | Galb1-4GlcNAcb1-3Galb1-3GlcNAcb-Sp0                                                                                                   | 5 | 5  | 95  |
| 519 | GalNAca1-3(Fuca1-2)Galb1-4GlcNAcb1-6GalNAc-Sp14                                                                                       | 5 | 10 | 201 |
| 13  | Glc-Sp8                                                                                                                               | 5 | 9  | 177 |
| 177 | GlcNAcb1-6(GlcNAcb1-3)GalNAca-Sp14                                                                                                    | 5 | 5  | 97  |
| 387 | Galb1-4GlcNAcb1-6(Galb1-4GlcNAcb1-2)Mana1-6(Galb1-4GlcNAcb1-4(Galb1-4GlcNAcb1-2)Mana1-3)Manb1-4GlcNAcb1-4GlcNAcb-Sp21                 | 5 | 9  | 171 |
| 383 | Galb1-4(Fuca1-3)GlcNAcb1-6(Galb1-3GlcNAcb1-3)Galb1-4Glc-Sp21                                                                          | 5 | 4  | 87  |
| 399 | Neu5Aca2-3Galb1-3GlcNAcb1-3GalNAca-Sp14                                                                                               | 5 | 6  | 128 |
| 178 | GlcNAcb1-6(GlcNAcb1-3)Galb1-4GlcNAcb-Sp8                                                                                              | 5 | 10 | 217 |
| 498 | Gala1-3(Fuca1-2)Galb1-4GlcNAcb1-6GalNAca-Sp14                                                                                         | 5 | 6  | 125 |
| 210 | Mana1-6(Mana1-2Mana1-3)Mana1-6(Mana1-2Mana1-3)Manb1-4GlcNAcb1-4GlcNAcb-Sp12                                                           | 5 | 6  | 119 |
| 546 | GlcNAcb1-3Galb1-4GlcNAcb1-3Galb1-4GlcNAcb1-2Mana1-6(GlcNAcb1-3Galb1-4GlcNAcb1-3Galb1-4GlcNAcb1-2Mana1-3)Manb1-4GlcNAcb1-4GlcNAcb-Sp25 | 5 | 7  | 144 |
| 315 | Mana1-2Mana1-6(Mana1-3)Mana1-6(Mana1-2Mana1-2Mana1-3)Mana-Sp9                                                                         | 5 | 8  | 179 |
| 414 | GalNAca1-3(Fuca1-2)Galb1-4GlcNAcb1-3GalNAca-Sp14                                                                                      | 5 | 9  | 200 |
| 314 | Mana1-6(Mana1-3)Mana1-6(Mana1-3)Manb-Sp10                                                                                             | 5 | 3  | 57  |
| 539 | GlcNAcb1-3Galb1-4GlcNAcb1-2Mana1-6(GlcNAcb1-3Galb1-4GlcNAcb1-2Mana1-3)Manb1-4GlcNAcb1-4GlcNAcb-Sp12                                   | 4 | 11 | 245 |
| 59  | Fuca1-2Galb1-3GalNAcb1-3Gala1-4Galb1-4Glc-Sp9                                                                                         | 4 | 5  | 119 |
| 10  | Neu5Aca-Sp11                                                                                                                          | 4 | 6  | 147 |
| 323 | Neu5Gcb2-6Galb1-4GlcNAc-Sp8                                                                                                           | 4 | 6  | 136 |
| 90  | GalNAca1-3(Fuca1-2)Galb-Sp18                                                                                                          | 4 | 4  | 86  |
| 560 | Gala1-3Galb1-4GlcNAcb1-2Mana1-6(Gala1-3Galb1-4GlcNAcb1-2Mana1-3)Manb1-4GlcNAcb1-4GlcNAc-Sp24                                          | 4 | 29 | 690 |
| 599 | Galb1-4GlcNAcb1-3Galb1-3GalNAca-Sp14                                                                                                  | 4 | 7  | 165 |
| 195 | Glc1-4Glc-Sp8                                                                                                                         | 4 | 9  | 206 |
| 603 | Neu5Aca2-3Galb1-4GlcNAcb1-3Galb1-4GlcNAcb1-2Mana1-6(Neu5Aca2-3Galb1-4GlcNAcb1-3Galb1-4GlcNAcb1-2Mana1-3)Manb1-4GlcNAcb1-4GlcNAcb-Sp12 | 4 | 9  | 214 |
| 267 | Neu5Aca2-6Galb1-4(6S)GlcNAcb-Sp8                                                                                                      | 4 | 4  | 91  |
| 268 | Neu5Aca2-6Galb1-4GlcNAcb-Sp0                                                                                                          | 4 | 9  | 214 |
| 600 | Neu5Aca2-3Galb1-4GlcNAcb1-3Galb1-4GlcNAcb1-6(Galb1-3)GalNAca-Sp14                                                                     | 4 | 5  | 136 |
| 19  | Galb1-4GlcNAcb1-6(Galb1-4GlcNAcb1-3)GalNAca-Sp8                                                                                       | 4 | 4  | 103 |
| 62  | Fuca1-2Galb1-3GalNAca-Sp14                                                                                                            | 4 | 3  | 73  |
| 434 | GlcNAcb1-6(GlcNAcb1-2)Mana1-6(GlcNAcb1-4)(GlcNAcb1-4)(GlcNAcb1-2)Mana1-3)Manb1-4GlcNAcb1-4GlcNAc-Sp21                                 | 4 | 5  | 136 |
| 157 | Galb1-4GalNAca1-3(Fuca1-2)Galb1-4GlcNAcb-Sp8                                                                                          | 4 | 3  | 81  |
| 131 | Galb1-4GlcNAcb1-6GalNAca-Sp8                                                                                                          | 4 | 4  | 110 |
| 272 | Neu5Aca2-6Galb1-4Glc-Sp0                                                                                                              | 4 | 6  | 160 |
| 286 | Neu5Gca2-6Galb1-4GlcNAcb-Sp0                                                                                                          | 4 | 6  | 167 |
| 435 | Galb1-4GlcNAcb1-2Mana1-6(GlcNAcb1-4)(Galb1-4GlcNAcb1-2Mana1-3)Manb1-4GlcNAcb1-4GlcNAc-Sp21                                            | 4 | 4  | 104 |
| 386 | Galb1-3GlcNAcb1-3Galb1-4(Fuca1-3)GlcNAcb1-6(Galb1-3GlcNAcb1-3)Galb1-4Glc-Sp21                                                         | 4 | 7  | 188 |
| 433 | GlcNAcb1-6(GlcNAcb1-2)Mana1-6(GlcNAcb1-4)(GlcNAcb1-2Mana1-3)Manb1-4GlcNAcb1-4GlcNAc-Sp21                                              | 4 | 6  | 162 |
| 17  | GlcNAcb-Sp8                                                                                                                           | 4 | 5  | 154 |
| 173 | GlcNAca1-3Galb1-4GlcNAcb-Sp8                                                                                                          | 3 | 6  | 187 |
| 154 | Galb1-4(Fuca1-3)GlcNAcb1-3Galb1-4(Fuca1-3)GlcNAcb1-3Galb1-4(Fuca1-3)GlcNAcb-Sp0                                                       | 3 | 6  | 174 |
| 265 | Neu5Aca2-6GalNAca-Sp8                                                                                                                 | 3 | 10 | 297 |

|     |                                                                                                             |     |    |       |
|-----|-------------------------------------------------------------------------------------------------------------|-----|----|-------|
| 279 | Neu5Acb2-6Galb1-4GlcNAcb-Sp8                                                                                | 3   | 5  | 158   |
| 218 | Neu5Aca2-3Galb1-4GlcNAcb1-3Galb1-4(Fuca1-3)GlcNAcb-Sp0                                                      | 3   | 8  | 257   |
| 390 | Fuca1-2Galb1-3GalNAca1-3(Fuca1-2)Galb1-4GlcNAcb-Sp0                                                         | 3   | 2  | 80    |
| 443 | (6S)Galb1-3GlcNAcb-Sp0                                                                                      | 3   | 14 | 504   |
| 309 | GlcNAcb1-3Man-Sp10                                                                                          | 3   | 6  | 222   |
| 401 | Galb1-4(Fuca1-3)GlcNAcb1-3GalNAca-Sp14                                                                      | 3   | 4  | 144   |
| 112 | Gala1-3GalNAcb-Sp8                                                                                          | 3   | 4  | 152   |
| 191 | GlcNAcb1-4GlcNAcb1-4GlcNAcb-Sp8                                                                             | 3   | 6  | 210   |
| 525 | Gala1-3(Fuca1-2)Galb1-3GlcNAcb1-6GalNAc-Sp14                                                                | 3   | 4  | 142   |
| 569 | (3S)GlcAb1-3Galb1-4GlcNAcb1-3Galb1-4Glc-Sp0                                                                 | 3   | 6  | 245   |
| 566 | GlcNAcb1-3Galb1-3GalNAc-Sp14                                                                                | 2   | 5  | 204   |
| 73  | Fuca1-2Galb1-4GlcNAcb1-3Galb1-4GlcNAcb-Sp0                                                                  | 2   | 3  | 113   |
| 162 | Galb1-4GlcNAcb1-3Galb1-4GlcNAcb1-3Galb1-4GlcNAcb-Sp0                                                        | 2   | 4  | 173   |
| 54  | Galb1-4GlcNAcb1-2Mana1-6(Galb1-4GlcNAcb1-2Mana1-3)Manb1-4GlcNAcb1-4GlcNAcb-Sp12                             | 2   | 6  | 253   |
| 329 | Neu5Ac2a2-3Galb1-3GlcNAcb-Sp0                                                                               | 2   | 4  | 228   |
| 271 | Neu5Aca2-6Galb1-4GlcNAcb1-3Galb1-4GlcNAcb-Sp0                                                               | 2   | 6  | 326   |
| 250 | Neu5Aca2-3Galb1-3GlcNAcb-Sp8                                                                                | 2   | 6  | 340   |
| 197 | GlcA1-6GlcA1-6Glc-Sp8                                                                                       | 2   | 4  | 264   |
| 409 | Gala1-3(Fuca1-2)Galb1-4(Fuca1-3)Glc-Sp21                                                                    | 2   | 2  | 137   |
| 50  | Mana1-6(Mana1-3)Manb1-4GlcNAcb1-4GlcNAcb-Sp12                                                               | 2   | 3  | 219   |
| 214 | Mana1-2Mana1-2Mana1-6(Mana1-3)Mana-Sp9                                                                      | 1   | 5  | 332   |
| 137 | Neu5Acb2-6(Galb1-3)GalNAca-Sp8                                                                              | 1   | 4  | 303   |
| 526 | Neu5Aca2-3Galb1-3GlcNAcb1-2Mana-Sp0                                                                         | 1   | 6  | 495   |
| 529 | Neu5Aca2-3Galb1-3GlcNAcb1-4Galb1-4Glc-Sp0                                                                   | 1   | 3  | 235   |
| 562 | GalNAcb1-3GlcNAcb-Sp0                                                                                       | 1   | 7  | 657   |
| 273 | Neu5Aca2-6Galb1-4Glc-Sp8                                                                                    | 1   | 4  | 542   |
| 421 | GlcNAcb1-2(GlcNAcb1-6)Mana1-6(GlcNAcb1-2Mana1-3)Manb1-4GlcNAcb1-4GlcNAcb-Sp19                               | 1   | 4  | 576   |
| 384 | Galb1-4GlcNAcb1-6(Fuca1-4(Fuca1-2Galb1-3)GlcNAcb1-3)Galb1-4Glc-Sp21                                         | 1   | 2  | 386   |
| 30  | (3S)Galb1-3GlcNAcb-Sp0                                                                                      | 1   | 8  | 1397  |
| 166 | Galb1-4GlcNAcb1-6(Galb1-3)GalNAca-Sp8                                                                       | 0   | 2  | 502   |
| 292 | Galb1-4(Fuca1-3)GlcNAcb1-3Galb1-3(Fuca1-4)GlcNAcb-Sp0                                                       | 0   | 7  | 2362  |
| 189 | GlcNAcb1-4GlcNAcb1-4GlcNAcb1-4GlcNAcb1-4GlcNAcb1-4GlcNAcb1-Sp8                                              | 0   | 6  | 2209  |
| 297 | (6S)Galb1-4(6S)GlcNAcb-Sp0                                                                                  | 0   | 4  | 2762  |
| 3   | Mana-Sp8                                                                                                    | 0   | 3  | 2170  |
| 232 | GalNAcb1-4(Neu5Aca2-3)Galb1-4GlcNAcb-Sp8                                                                    | 0   | 4  | -7445 |
| 497 | Fuca1-2(6S)Galb1-3GlcNAcb-Sp0                                                                               | 0   | 10 | -5710 |
| 120 | Gala1-4Galb1-4GlcNAcb-Sp0                                                                                   | 0   | 7  | -2298 |
| 331 | Neu5Aca2-3Galb1-3(Fuca1-4)GlcNAcb1-3Galb1-3(Fuca1-4)GlcNAcb-Sp0                                             | 0   | 7  | -2070 |
| 609 | GlcNAcb1-3Fuca-Sp21                                                                                         | 0   | 5  | -1390 |
| 43  | (6S)Galb1-4Glc-Sp8                                                                                          | -1  | 5  | -763  |
| 96  | GalNAcb1-3Gala1-4Galb1-4GlcNAcb-Sp0                                                                         | -1  | 8  | -1245 |
| 505 | Fuca1-2Galb1-3GlcNAcb1-6(Fuca1-2Galb1-3GlcNAcb1-3)GalNAca-Sp14                                              | -1  | 4  | -546  |
| 282 | Neu5Gca2-3Galb1-4(Fuca1-3)GlcNAcb-Sp0                                                                       | -1  | 4  | -566  |
| 170 | Galb1-4GlcNAcb-Sp23                                                                                         | -1  | 4  | -427  |
| 597 | Neu5Aca2-6Galb1-4GlcNAcb1-3Galb1-4GlcNAcb1-3GalNAca-Sp14                                                    | -1  | 3  | -362  |
| 410 | Galb1-4GlcNAcb1-6(Neu5Aca2-6Galb1-3GlcNAcb1-3)Galb1-4Glc-Sp21                                               | -1  | 10 | -970  |
| 23  | 6S(3S)Galb1-4GlcNAcb-Sp0                                                                                    | -1  | 9  | -738  |
| 385 | Galb1-4(Fuca1-3)GlcNAcb1-6(Fuca1-4(Fuca1-2Galb1-3)GlcNAcb1-3)Galb1-4Glc-Sp21                                | -1  | 12 | -962  |
| 366 | Neu5Aca2-6GlcNAcb1-4GlcNAc-Sp21                                                                             | -2  | 4  | -196  |
| 220 | Fuca1-2(6S)Galb1-4GlcNAcb-Sp0                                                                               | -2  | 12 | -540  |
| 300 | Galb1-3Galb1-4GlcNAcb-Sp8                                                                                   | -2  | 3  | -131  |
| 602 | Neu5Aca2-6Galb1-4GlcNAcb1-6(Galb1-3)GalNAca-Sp14                                                            | -3  | 7  | -249  |
| 532 | Galb1-4GlcNAcb1-2 Mana1-6(Galb1-4GlcNAcb1-4)(Galb1-4GlcNAcb1-2Mana1-3)Manb1-4GlcNAcb1-4(Fuca1-6)GlcNAc-Sp21 | -3  | 11 | -408  |
| 517 | Galb1-4(6P)GlcNAcb-Sp0                                                                                      | -3  | 11 | -394  |
| 536 | GalNAca1-3(Fuca1-2)Galb1-3GalNAcb1-3Gala1-4Galb1-4Glc-Sp21                                                  | -3  | 19 | -616  |
| 530 | GlcNAcb1-2 Mana1-6(GlcNAcb1-4)(GlcNAcb1-2Mana1-3)Manb1-4GlcNAcb1-4(Fuca1-6)GlcNAc-Sp21                      | -3  | 2  | -57   |
| 258 | Neu5Aca2-3Galb1-4GlcNAcb1-3Galb1-4GlcNAcb1-3Galb1-4GlcNAcb-Sp0                                              | -3  | 6  | -195  |
| 122 | Gala1-4Galb1-4Glc-Sp0                                                                                       | -4  | 17 | -476  |
| 26  | (3S)Galb1-4(6S)Glc-Sp0                                                                                      | -4  | 8  | -185  |
| 534 | Neu5Aca2-3Galb1-4(Fuca1-3)GlcNAcb1-2Mana-Sp0                                                                | -4  | 11 | -269  |
| 528 | GalNAcb1-4GlcNAcb1-2Mana-Sp0                                                                                | -4  | 6  | -139  |
| 61  | Fuca1-2Galb1-3GalNAca-Sp8                                                                                   | -4  | 4  | -91   |
| 452 | Neu5Aca2-8Neu5Aca2-3Galb1-3GalNAcb1-4(Neu5Aca2-8Neu5Aca2-3)Galb1-4Glc-Sp0                                   | -4  | 6  | -145  |
| 262 | Fuca1-2Galb1-4(6S)Glc-Sp0                                                                                   | -5  | 11 | -225  |
| 264 | Neu5Aca2-3Galb1-4Glc-Sp8                                                                                    | -5  | 3  | -49   |
| 133 | GlcNAcb1-6(Galb1-3)GalNAca-Sp8                                                                              | -6  | 8  | -128  |
| 255 | Neu5Aca2-3Galb1-4(Fuca1-3)GlcNAcb-Sp8                                                                       | -6  | 8  | -134  |
| 105 | Gala1-3(Fuca1-2)Galb1-4GlcNAc-Sp0                                                                           | -7  | 3  | -46   |
| 289 | Galb1-3GlcNAcb1-3Galb1-3GlcNAcb-Sp0                                                                         | -7  | 10 | -144  |
| 99  | GalNAcb1-4GlcNAcb-Sp8                                                                                       | -9  | 5  | -49   |
| 304 | Galb1-4GlcNAca1-6Galb1-4GlcNAcb-Sp0                                                                         | -10 | 7  | -69   |
| 125 | Galb1-2Galb-Sp8                                                                                             | -10 | 8  | -74   |
| 260 | Neu5Aca2-3Galb1-4GlcNAcb-Sp8                                                                                | -14 | 9  | -64   |



Average RFU: indicates the average fluorescent unites from 4 independent determinations

STDv: standard deviation

% CV: variation coeficient
